# Supplementary material for: Resurrecting ancestral structural dynamics of an antiviral immune receptor: adaptive binding pocket reorganization repeatedly shifts RNA preference
Source: PubMed Central journal article supplement (PMC5101713; doi:10.1186/s12862-016-0818-6), 2016-11-08
Supplement: 12862_2016_818_MOESM1_ESM.pdf [file 12862_2016_818_MOESM1_ESM.pdf]

## Additional File 1

### Supplementary Figures

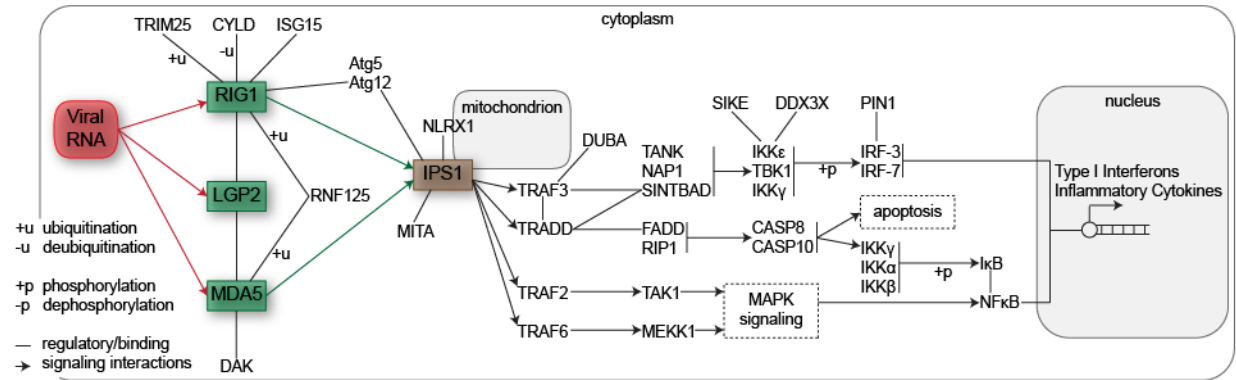

**Figure S1. RIG-like receptors (RLRs) bind viral RNA and initiate immune-signaling cascades through direct interactions with IPS1.** We show a simplified diagram of the main protein-protein interactions involved in immune signaling by RLRs, taken largely from the human “RIG-I-like receptor signaling pathway” in KEGG [1] and review of relevant literature. The RLRs are shown in green, with IPS1 in brown and viral RNA ligands in red. Primary signaling interactions are displayed by arrows, with plain lines indicating regulatory or physical interactions. Cellular compartments are outlined and shaded. Collapsed sub-networks are displayed using dotted outlines. Important (de)ubiquitination and (de)phosphorylation reactions are indicated. Although all three RLRs bind viral RNA, only RIG-I and MDA5 interact directly with the signal-transducing protein, IPS1 [2]. LGP2 appears to play regulatory roles during some viral infections, although the precise mechanisms are unknown [3-5]. Cellular results of RLR-initiated immune signaling include activation of type I interferons and inflammatory cytokines as well as initiation of apoptosis and direct activation of the inflammasome.

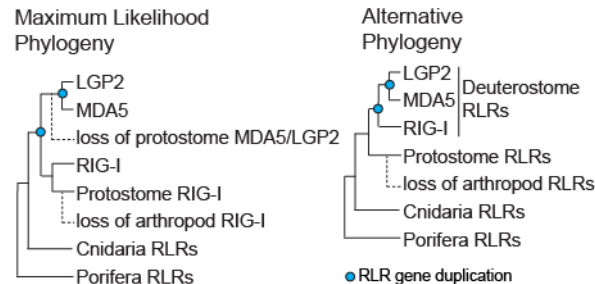

**Figure S2. Statistical topology tests reject deuterostome-specific expansion of RIG-like receptors (RLRs).** We compared the statistical support for the maximum likelihood phylogeny (left) to the alternative tree (right), in which all RLR gene duplications occurred after the protostome-deuterostome split. The AU test rejected the alternative phylogeny, assuming both PROBALIGN ( $p=0.023$ ) and MAFFT ( $p=0.018$ ) alignments. Dotted lines indicate inferred gene loss events, given each phylogeny.

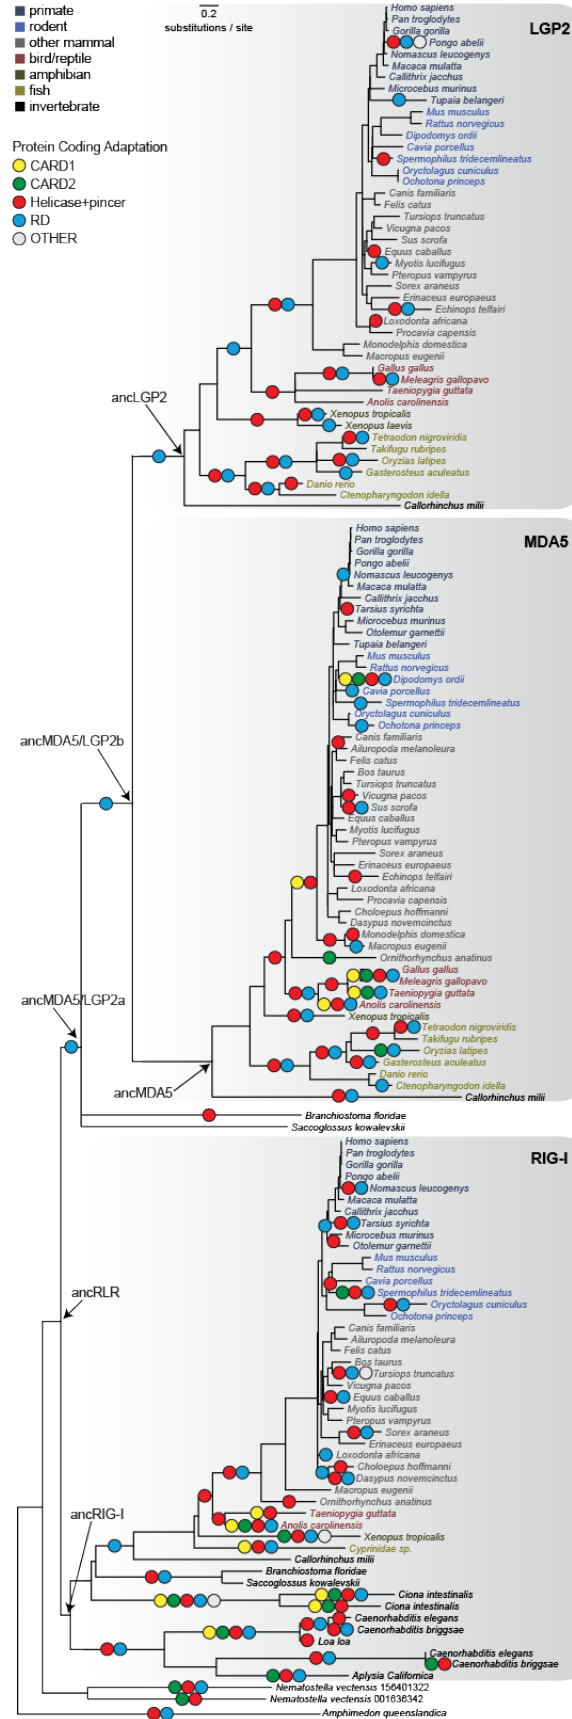

**Figure S3. Protein-coding adaptation affected only the RD early in RLR evolutionary history.** After reducing the number of vertebrate sequences by including only representative species, we tested each branch on the RLR phylogeny for protein-coding adaptation targeting specific functional domains (CARD1, CARD2, Helicase+pincer, RD or other regions of the protein sequence) using a branch-sites test (see Methods). Colored circles indicate significant support for protein-coding adaptation specific to the indicated domain ( $p < 0.05$  after correction for multiple tests).

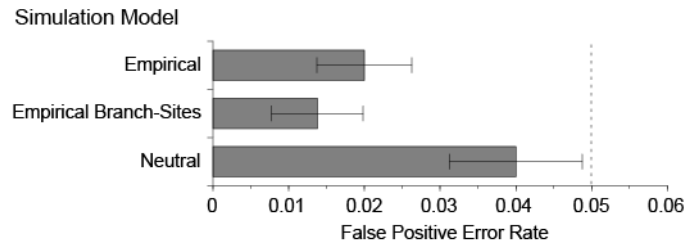

**Figure S4. Simulations suggest low expected false-positive error rates for branch-sites tests of positive selection on the RLR phylogeny.** We used PAML v4.7 to simulate 100 replicates of codon sequence data along the maximum-likelihood RLR phylogeny using three simulation models. The Empirical model estimated all simulation parameters from our empirical sequence data assuming a 'sites' model, in which an inferred proportion of sites evolve with nonsynonymous/synonymous rate ratio,  $\omega < 1$ , and the remaining sites evolve with  $\omega = 1$ . The Empirical Branch-Sites model is the same as the Empirical model, except all sites are released from selective constraint ( $\omega = 1$ ) on the specific branch being tested. The Neutral model allows all sites to evolve neutrally ( $\omega = 1$ ) on all branches. All other model parameters were estimated by maximum likelihood. We analyzed each replicate data set using the same procedure used to test our empirical data for protein-coding adaptation on specific branches (see Methods). We plot the mean and standard error in false-positive error rate over the 100 data sets simulated using each model. Dotted line indicates false-positive rate of 0.05.

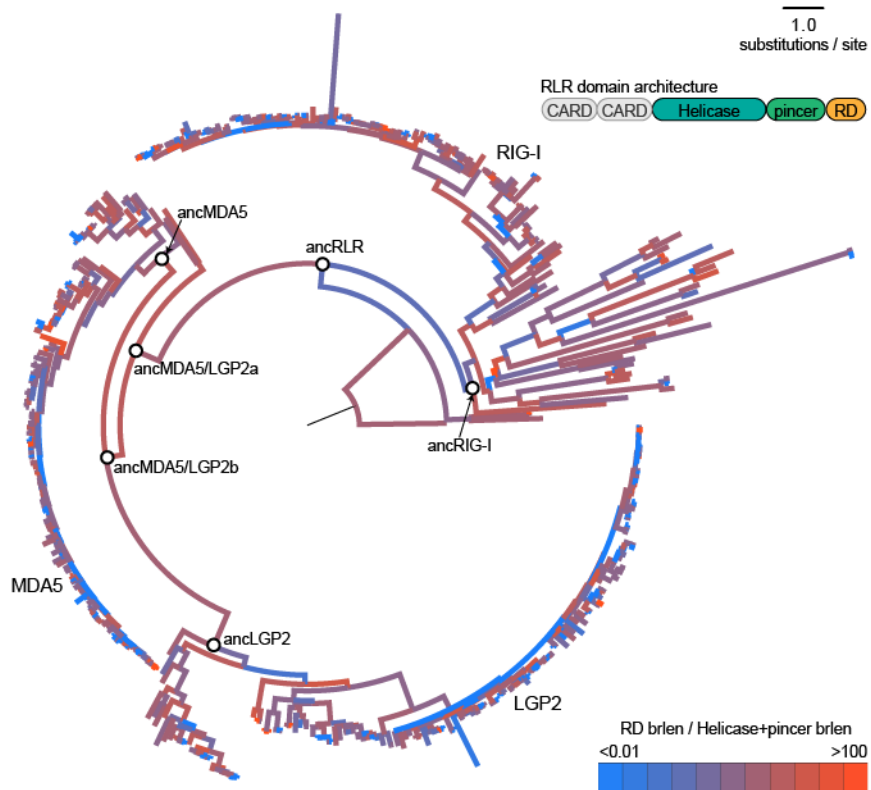

**Figure S5. RLR RD evolved more rapidly than combined Helicase+pincer domains along the early branches of the RLR phylogeny between ancRLR and the MDA5/LGP2 lineages.** We reconstructed the RLR gene phylogeny by maximum likelihood using two different alignments of all available RLR protein sequences (see Methods, Fig. 1). Branch lengths are scaled to the average number of substitutions/site across PROBALIGN and MAFFT alignments. We colored each branch according to the ratio of the length estimated using only the RD portion of the sequence alignment to the length estimated using the Helicase+pincer portion of the alignment. Blue indicates branches on which the Helicase+pincer evolved more rapidly than the RD, whereas red indicates branches on which the RD evolved faster than the Helicase+pincer.



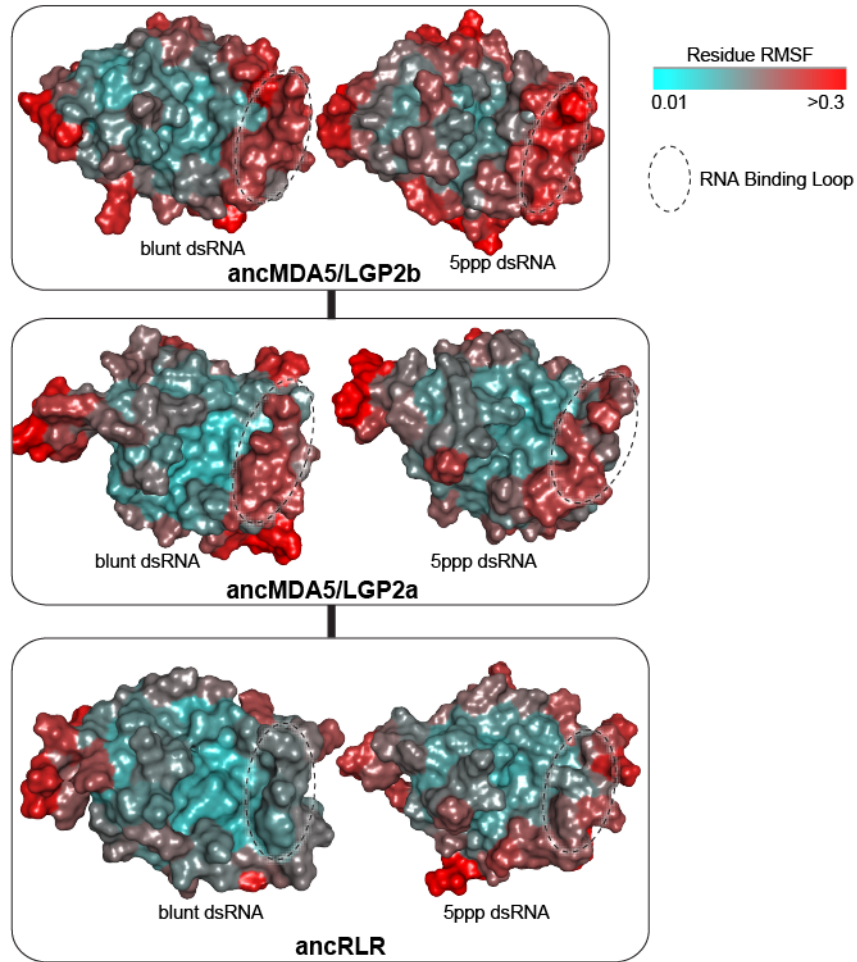

**Figure S6. Fluctuation of the RNA-binding loop increased in ancMDA5/LGP2a and ancMDA5/LGP2b, compared to ancRLR.** We plot the root mean squared fluctuation (RMSF) of each residue on the molecular surface of ancestral RLR RNA-recognition domains (RD), averaged over replicate molecular dynamics simulations of the combined helicase+pincer+RD bound to each type of RNA (see Methods). Higher values of RMSF indicate that the residue moved more over the course of the dynamics simulations. Dotted oval indicates location of the RNA-binding loop on each structure. See Figs. 1,2 for locations of each ancestral RLR on the phylogeny and ancestral RD sequences, respectively.

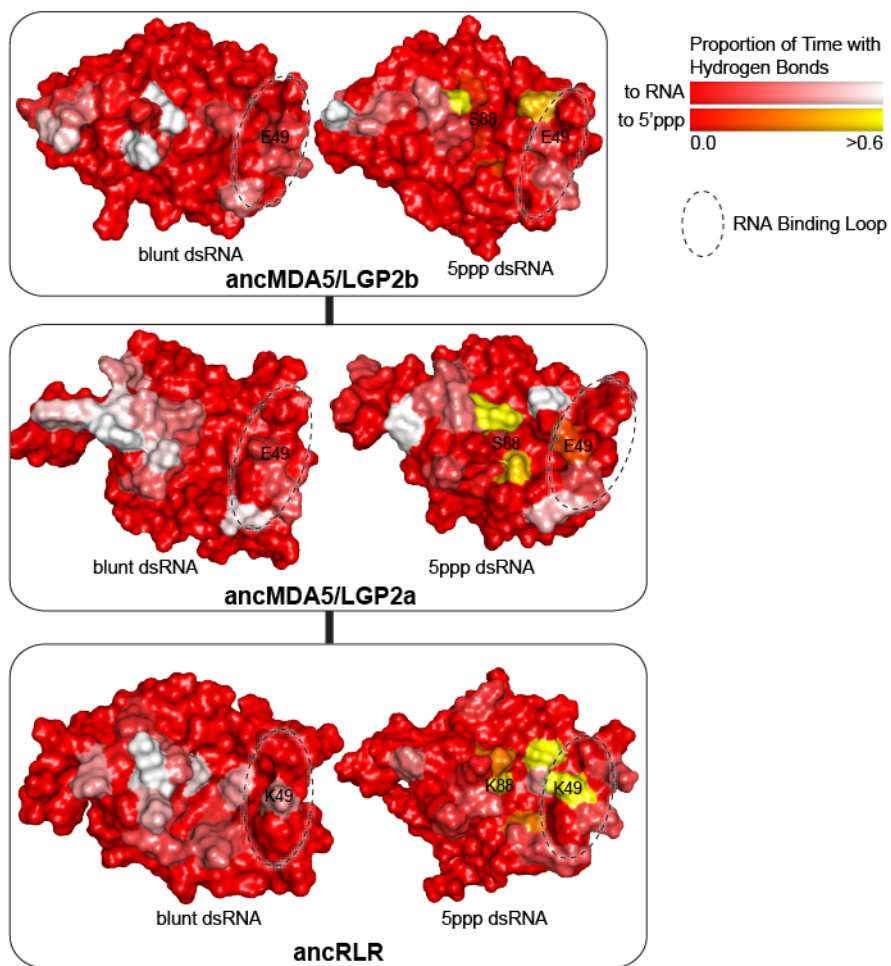

**Figure S7. The RNA-binding loop loses hydrogen bonding to RNA ligands in the MDA5/LGP2 lineage after the first RLR gene duplication.** We plot the proportion of molecular dynamics time points during which each residue was observed to form hydrogen bonds with the RNA ligand (red-white gradient) or the 5'ppp moiety in particular (red-yellow gradient), averaged over replicate simulations of ancestral RLR helicase+pincer+RD domains (see Methods). The RNA-binding loop and specific residues exhibiting reduced hydrogen bonding to 5'ppp dsRNA in ancMDA5/LGP2a-b are indicated.

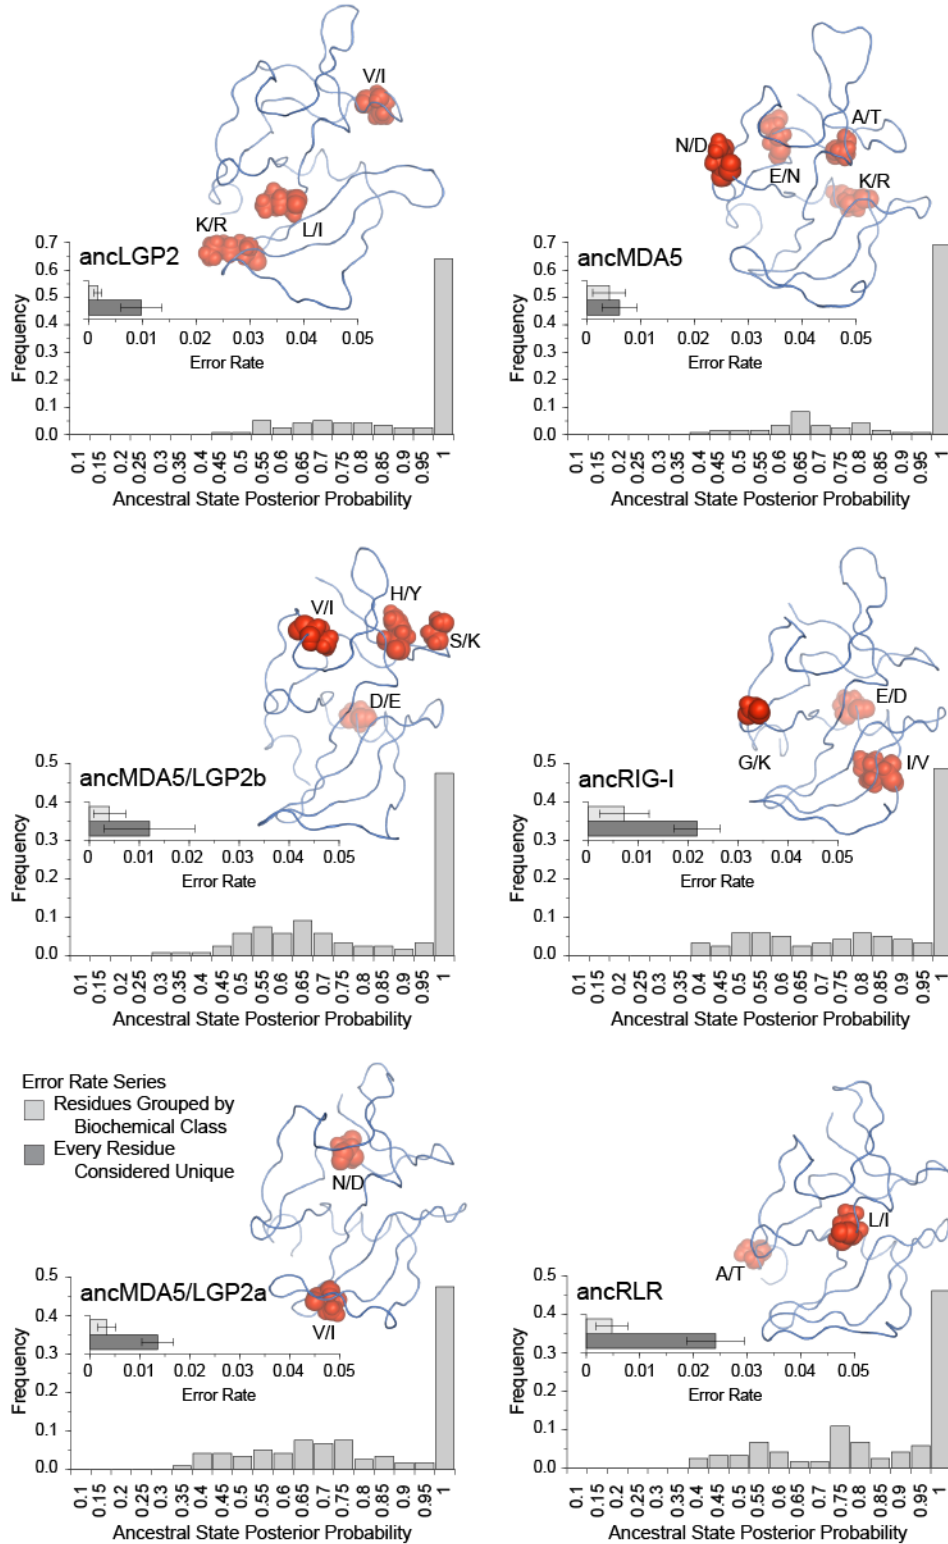

**Figure S8. Ancestral RLR RD protein sequences were reconstructed with high confidence and low ambiguity.** We reconstructed the ancestral sequences of key nodes on the RLR phylogeny (see Figs. 1,2). For each sequence, we plot the frequency with which individual residues were reconstructed with posterior probability ranging from 0.0 to 1.0, binned every 0.05. Inset into each graph, we simulated protein sequence data along the maximum-likelihood phylogeny using the best-fit evolutionary model and

plot the proportion of ancestral residues incorrectly inferred at each node. Dark series indicate error rates when each residue is considered unique, whereas light series indicate error rates when residues with similar biochemical properties are treated as equivalent; bars indicate standard errors. We show the locations on the RD structural models of residues having alternative ancestral reconstructions with posterior probability > 0.3.

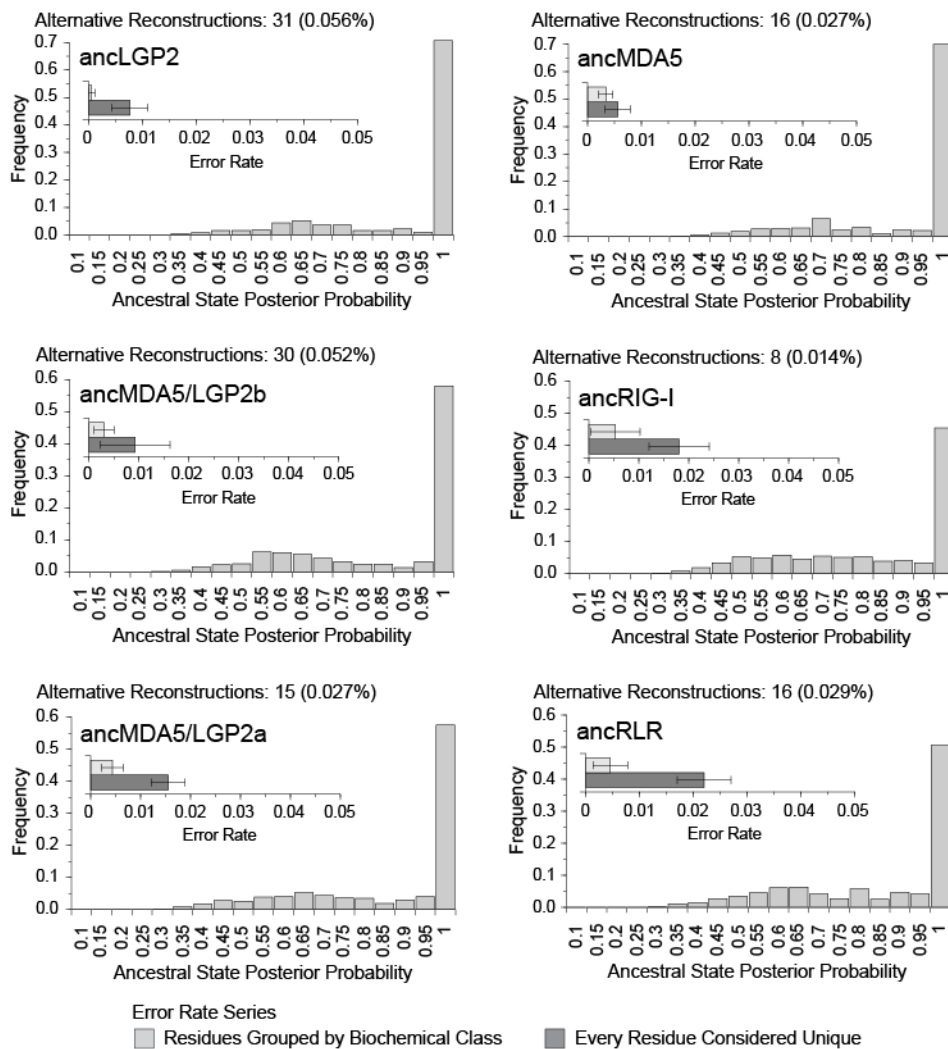

**Figure S9. Ancestral RLR helicase+pincer protein sequences were reconstructed with high confidence and low ambiguity.** We reconstructed the ancestral helicase+pincer sequences of key nodes on the RLR phylogeny (see Fig. 1). For each sequence, we plot the frequency with which individual residues were reconstructed with posterior probability ranging from 0.0 to 1.0, binned every 0.05. Inset into each graph, we simulated protein sequence data along the maximum-likelihood phylogeny using the best-fit evolutionary model and plot the proportion of ancestral residues incorrectly inferred at each node. Dark series indicate error rates when each residue is considered unique, whereas light series indicate error rates when residues with similar biochemical properties are treated as equivalent; bars indicate standard errors. We indicate the number (and percentage) of helicase+pincer residues having alternative ancestral reconstructions with posterior probability > 0.3.

**A**

```

alternative ancMDA5LGP2b EVRFRFCRCNCKLVCVHGSIDLVIEGMHHVVTPEFKIYKVRREHTPEPKKELDWEVNGEISCRKCGITWGMVMVHRGVNLPCLIKKFEVVE--PDQRR--LYKKWNEVPPRIPEFDYIEY
ancMDA5LGP2b EVVKLBCRCNCKKFCACNGEDIRKIEGMHHVVTNDFEKRYKVRREHTPEPKKEDDWEVNGKISCRKCGDVGMMVMVYKGVNLPCLIKKFEVLEY--PDGKR--LYKKWKDVPFPVPEFDYAEY
alternative ancMDA5LGP2a EVVGFRCRCNIVVACNGKDLRVIEGMHHVVDPEPKFYKVRREHTPEPKKEDDWEVNGKIBCRKCGDVGMMVMVHRGVNLPCLIKKFEVVE--NDGKR--LPKKWKDVPFQIPEFDYIEY
ancMDA5LGP2a EVVKLBCRCNCKKFCACNADDIRKIEGMHHVVDPEPKERYKVRREHTPEPKKEDDWEVNGKIBCRKCGDVGMMVMVYKGMELPCLIKKFEVLEY--PDGKR--LYKKWKDVPFAIPEFDYAEY
alternative ancRLR EDVKLFCRCNCKKFCACNGDIDRVIEGMHHVVDPEPKERYKVRPH--EKPKKEDDWEVNGKIBCRKCGDVGIMVMVHRGVNLPCLIKKFEVLEYDDKGRRLYKKWKDVPFTIPEFDYIEY
ancRLR EDVKLBCRCNCKKFCACNADDIRKIEGMHHVVDPELERIKVRPH--EKPKKEDDWEVNGKIBCRKCGDVGIMVMVYKGMELPCLIKKFEVLEYFADGRRRLYKKWKDVPFAIKDFDFAEY
1.....10.....20.....30.....40.....50.....60.....70.....80.....90.....100.....110.....120

```

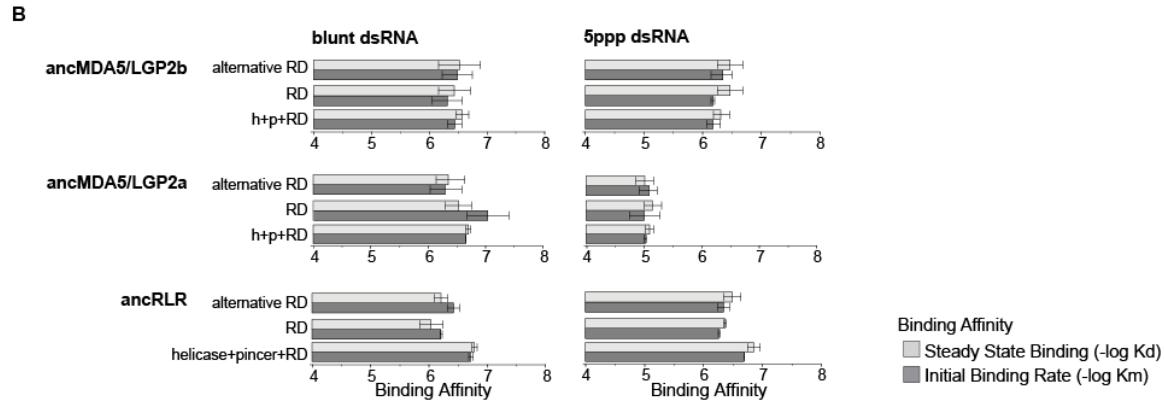

**Figure S10. Ancestral sequence reconstructions were similar across different alignments and exhibited similar RNA affinities.** We reconstructed ancestral RD sequences at key nodes on the RLR phylogeny (see Fig. 1) using the MAFFT protein sequence alignment (indicated as “alternative”). **A.** We compare ancestral RD protein sequences between the alternative MAFFT reconstruction and the original reconstruction using the PROBALIGN alignment. **B.** We measured steady-state ( $K_d$ ) and initial ( $K_m$ ) RNA binding affinities for each ancestral RLR to blunt and 5'ppp dsRNA (see Methods). We plot  $-\log$ -transformed binding affinities, with longer bars indicating higher affinity. Standard errors over three replicates are indicated. We compare RNA binding affinities measured for the PROBALIGN-reconstructed RDs and combined helicase+pincer+RD domains to the alternative MAFFT RD reconstructions.

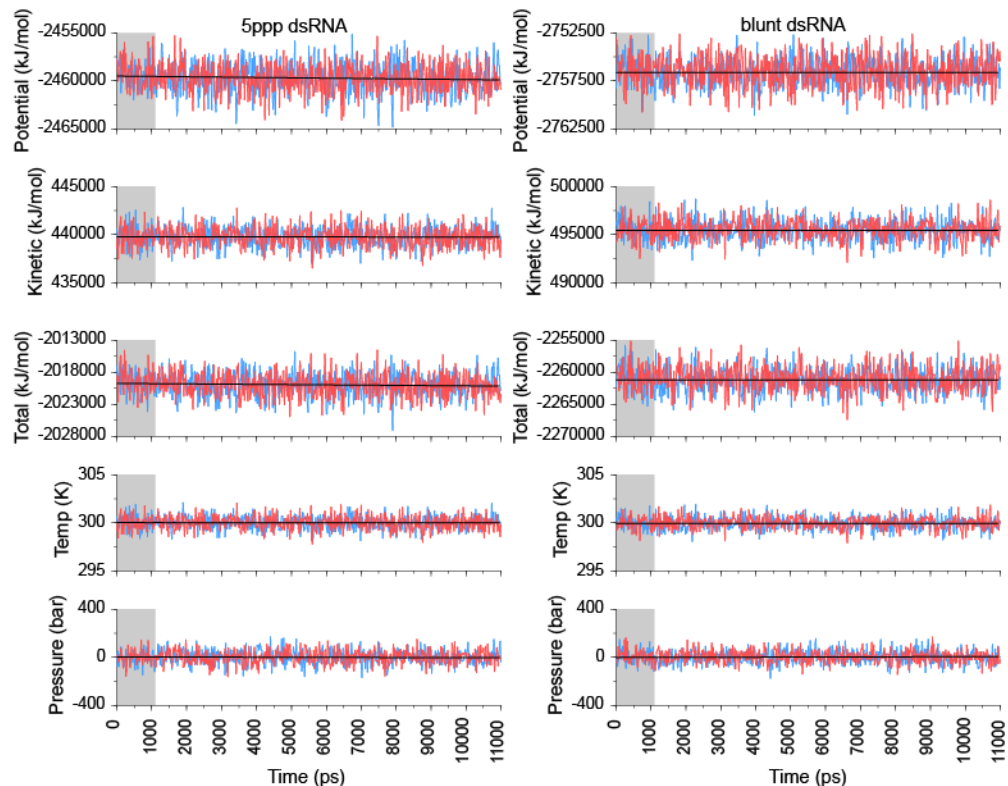

Figure S11 Part 1. ancLGP2.

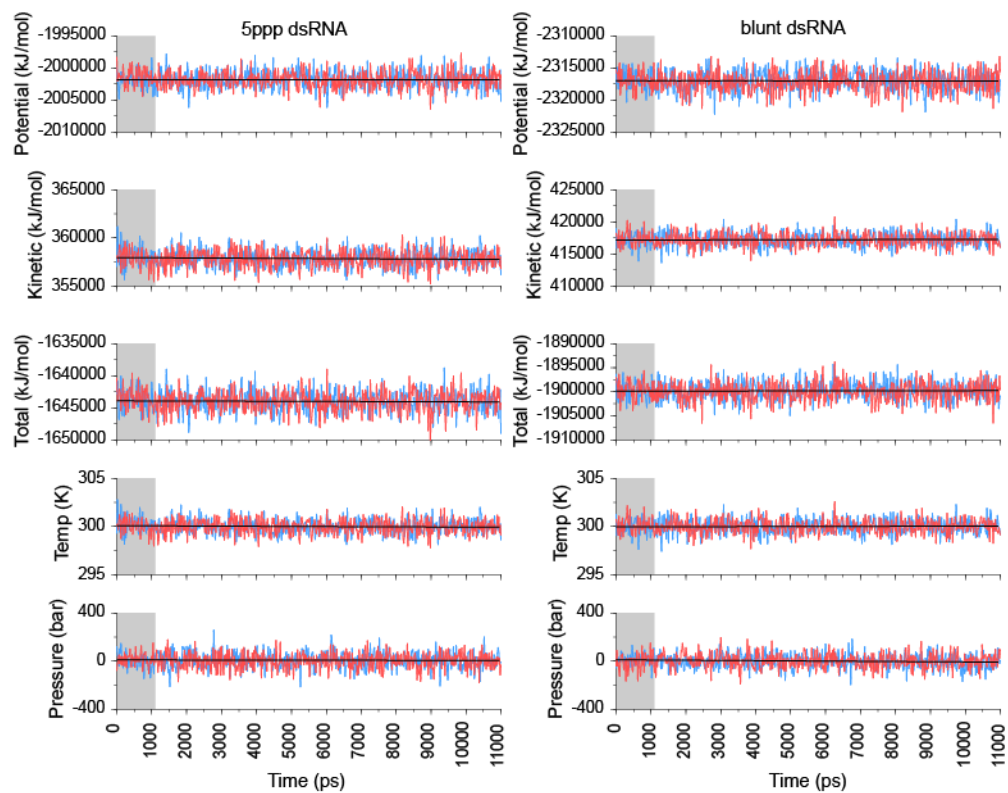

Figure S11 Part 2. ancMDA5.



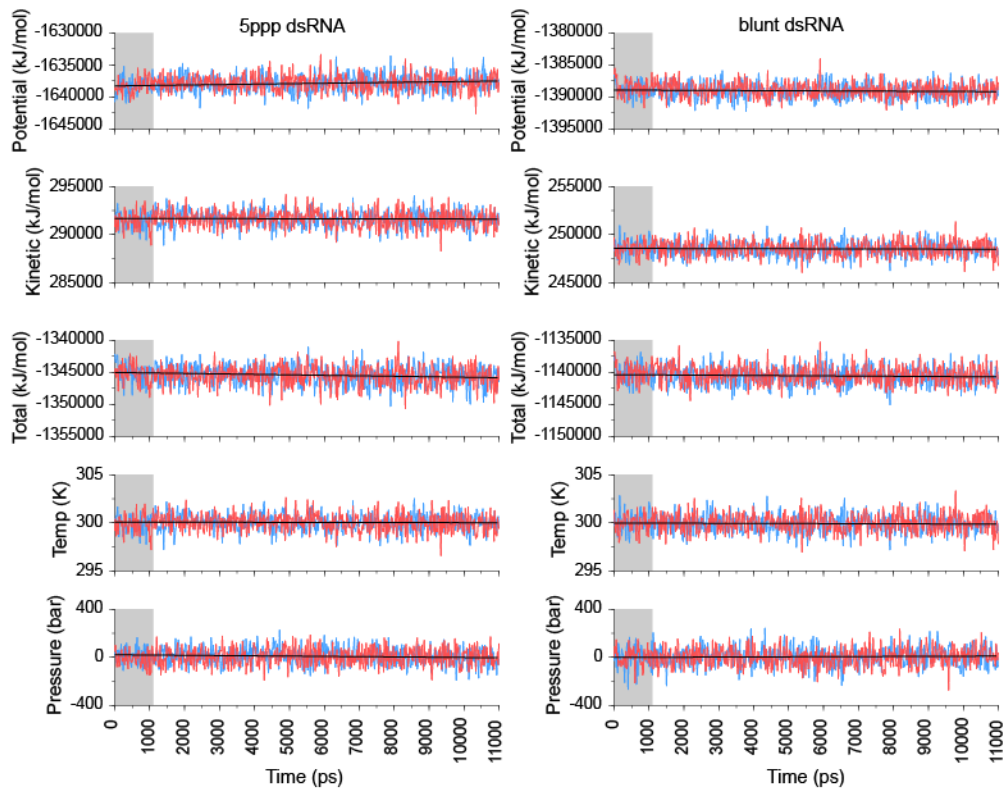

Figure S11 Part 3. ancMDA5/LGP2b.

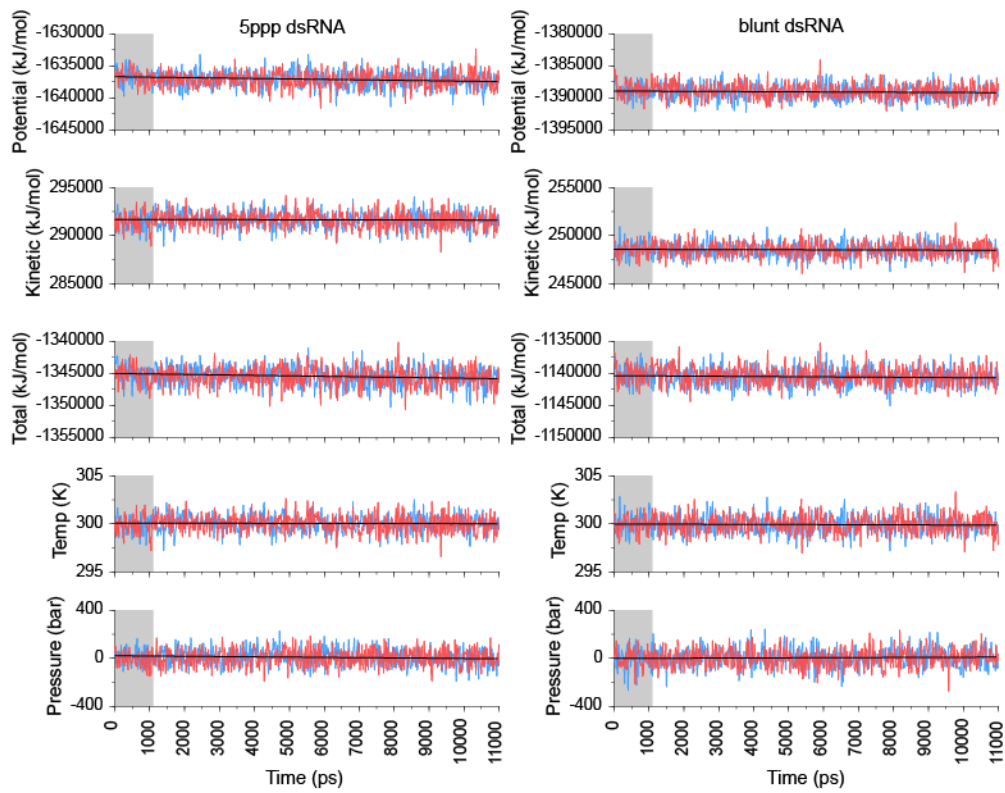

**Figure S11 Part 4. ancMDA5/LGP2a.**

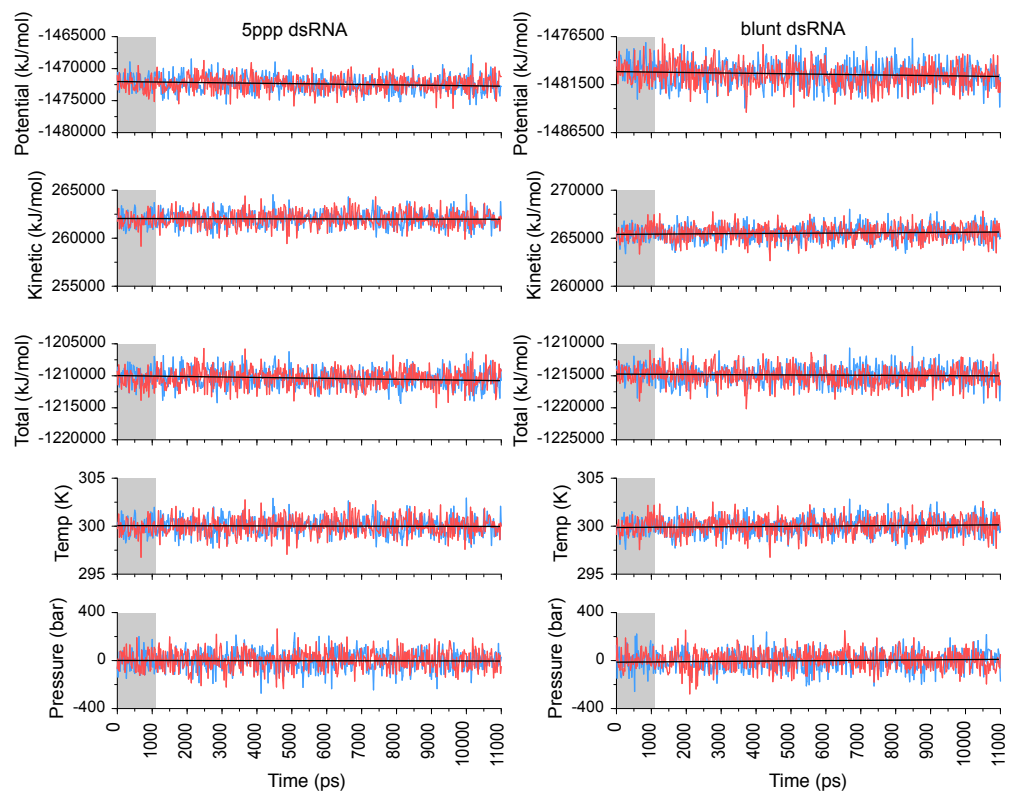

**Figure S11 Part 5. ancRIG-I.**



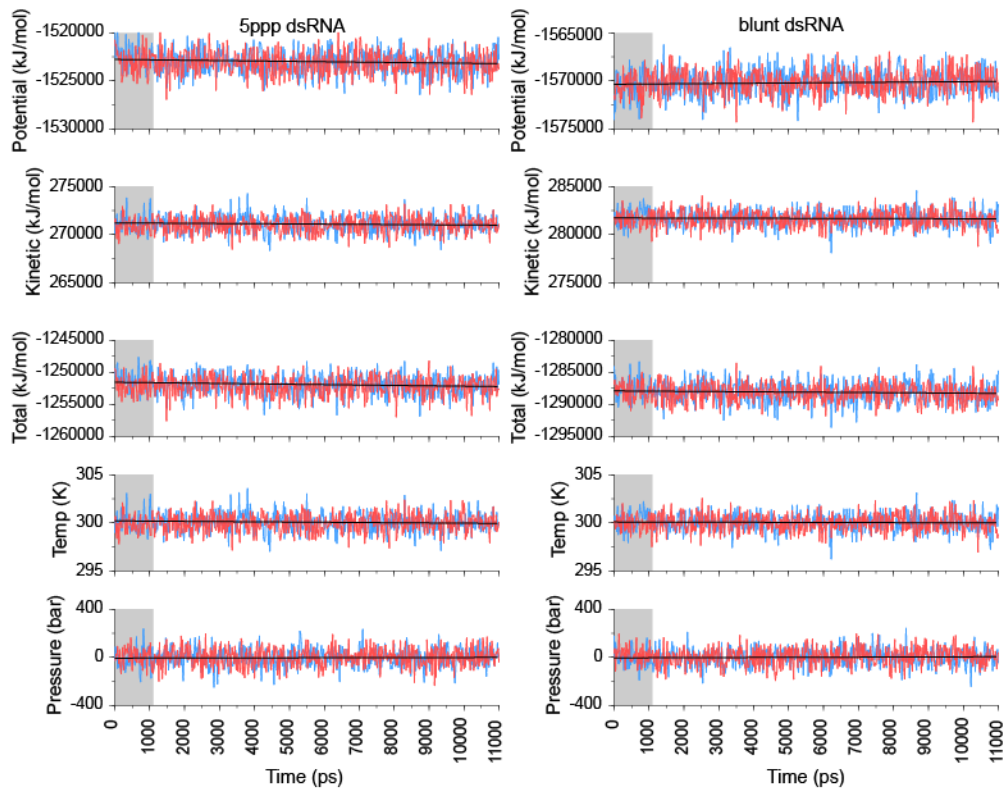

Figure S11 Part 6. ancRLR.

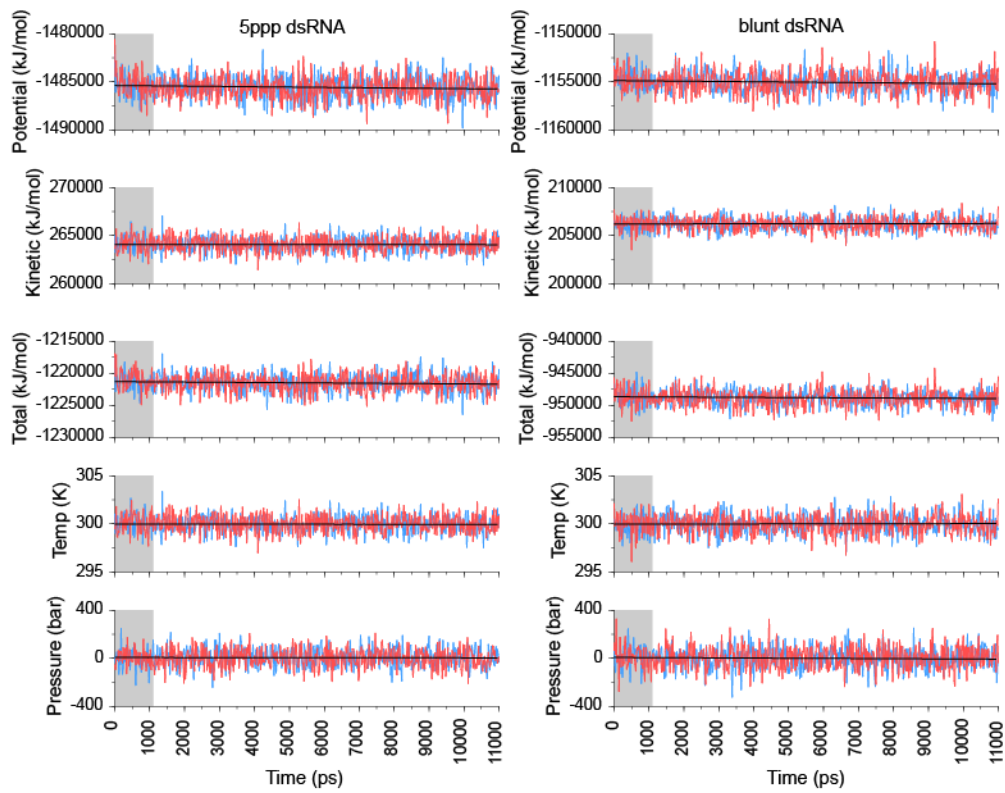

Figure S11 Part 7. ancMDA5/LGP2a<sup>H63S</sup>.

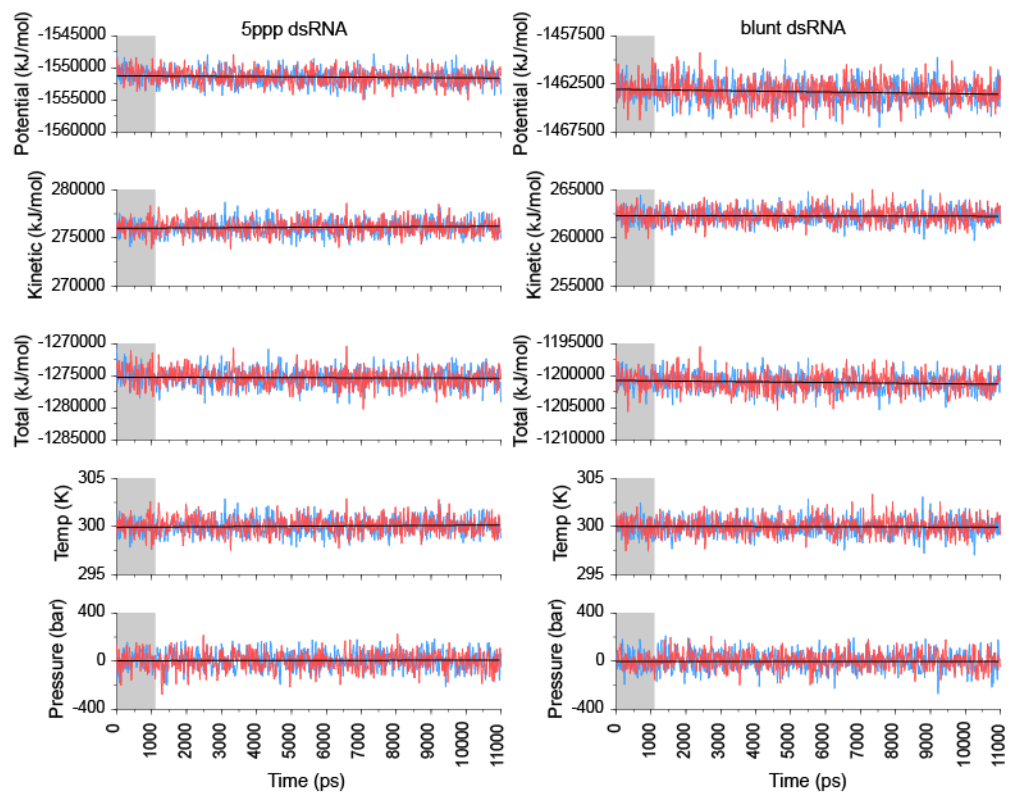

Figure S11 Part 8. ancMDA5/LGP2a<sup>TEE47ΔEK</sup>.

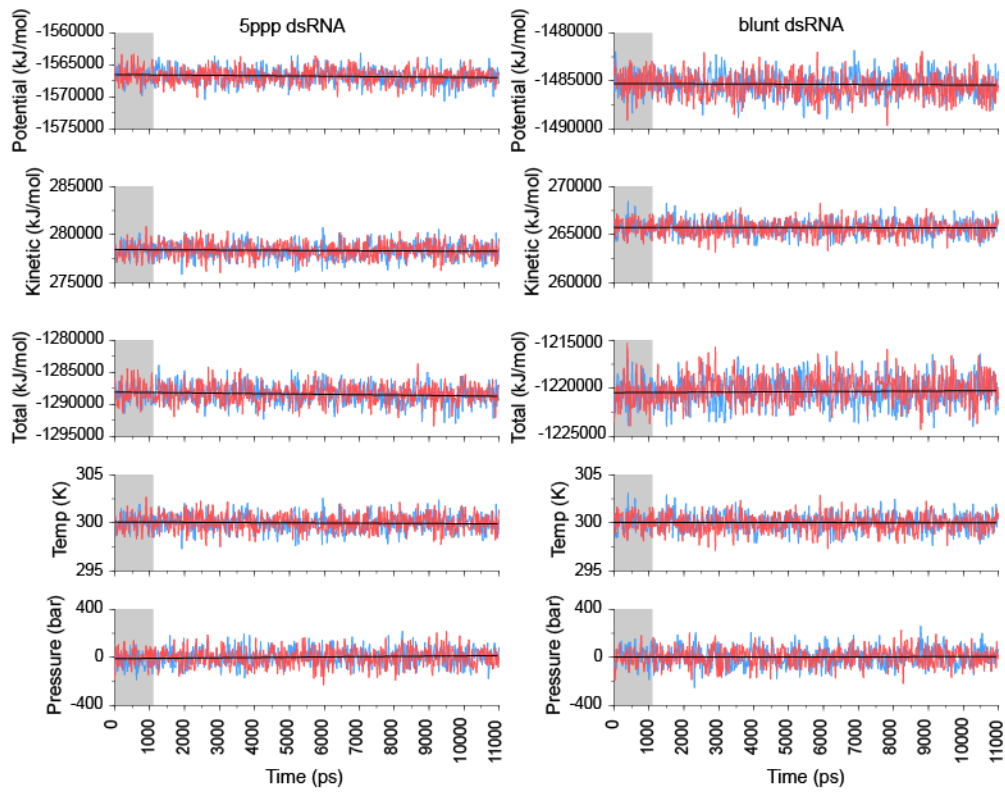

Figure S11 Part 9. ancRLR<sup>ΔEK47TEE,K88S</sup>.

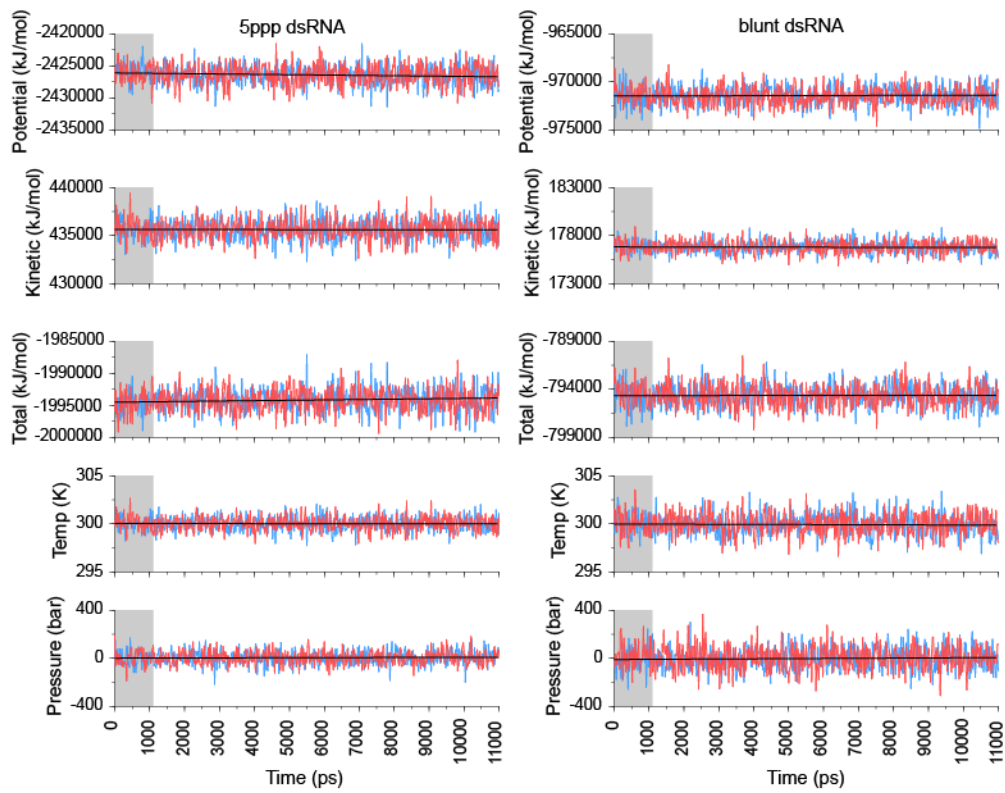

Figure S11 Part 10. Human LGP2.

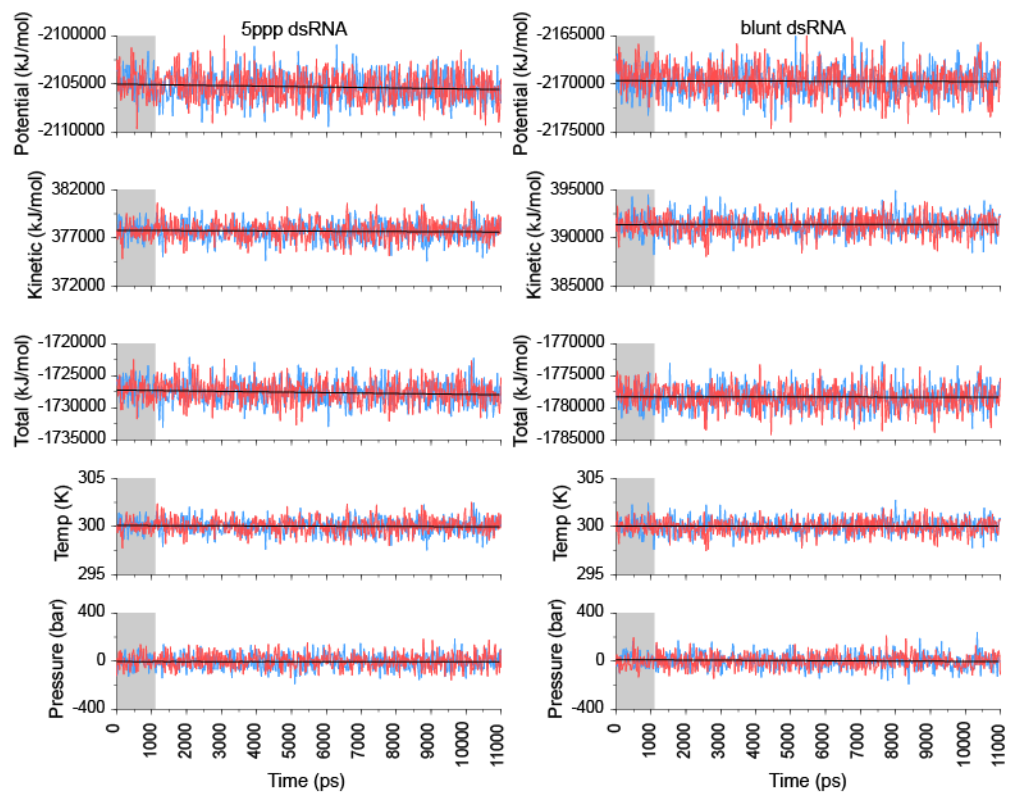

Figure S11 Part 11. Human MDA5.

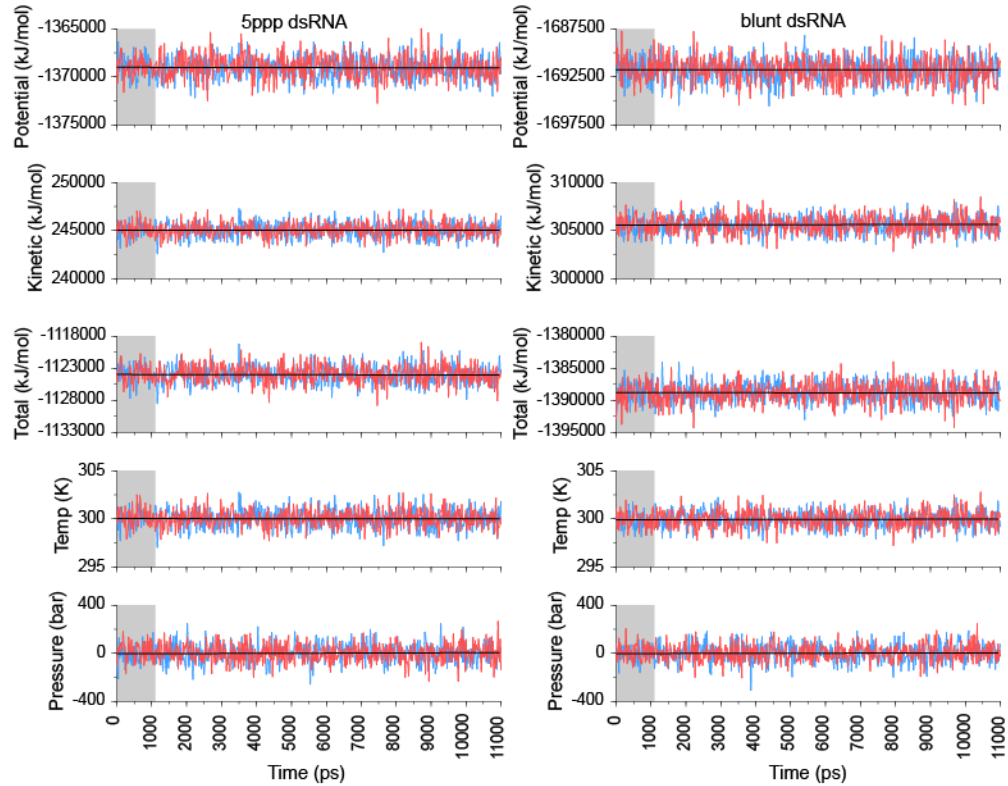

**Figure S11 Part 12. Human RIG-I.**

**Figure S11. Energy parameters were well-behaved across molecular dynamics simulations of human and ancestral RLR RDs bound to 5'ppp and blunt-ended dsRNA.** We plot potential, kinetic and total energy, as well as temperature and pressure, across the time course of each molecular dynamics simulation. Red and blue series indicate independent simulations of two RD proteins bound to either end of a double-stranded RNA molecule. We verified that characteristics of the RD-RNA complexes were less correlated between RDs in the same simulation than they were across simulations and considered each RD-RNA complex as an independent replicate for further analysis. Gray box indicates the first nanosecond of simulation, which we excluded from downstream analyses.

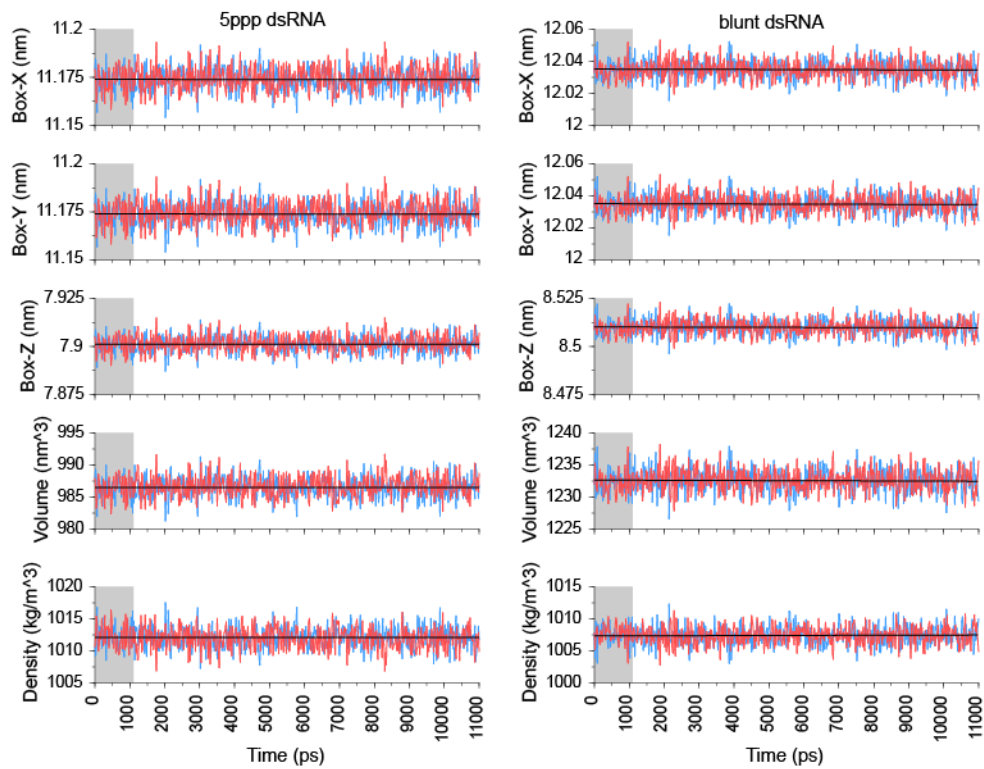

Figure S12 Part 1. ancLGP2.

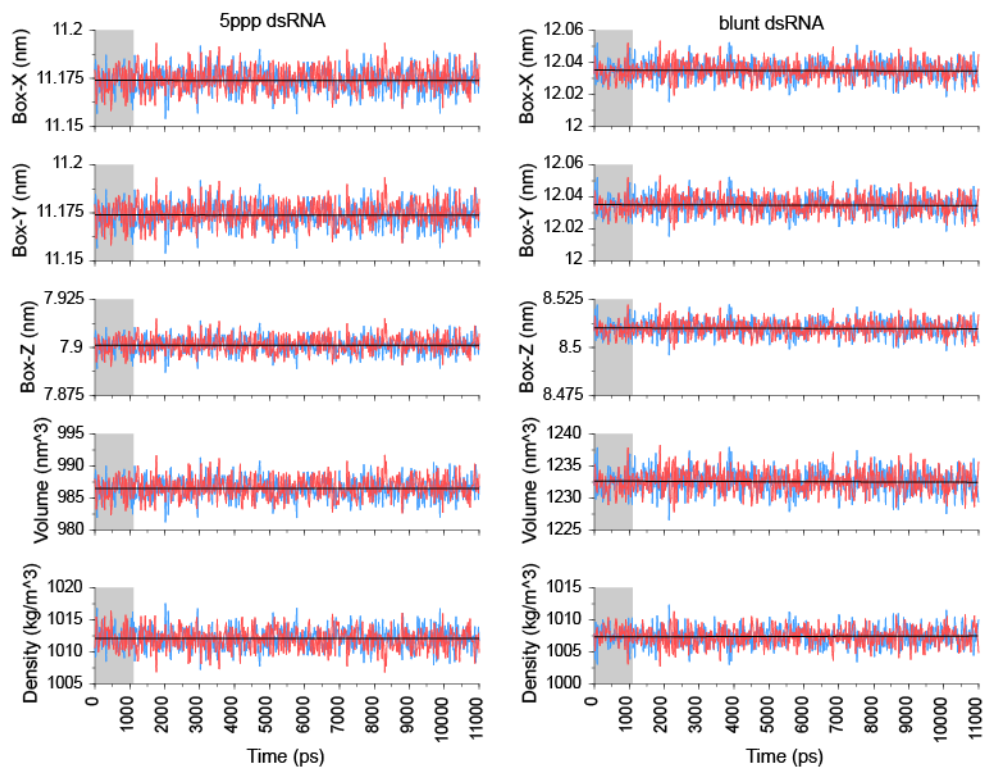

Figure S12 Part 2. ancMDA5.



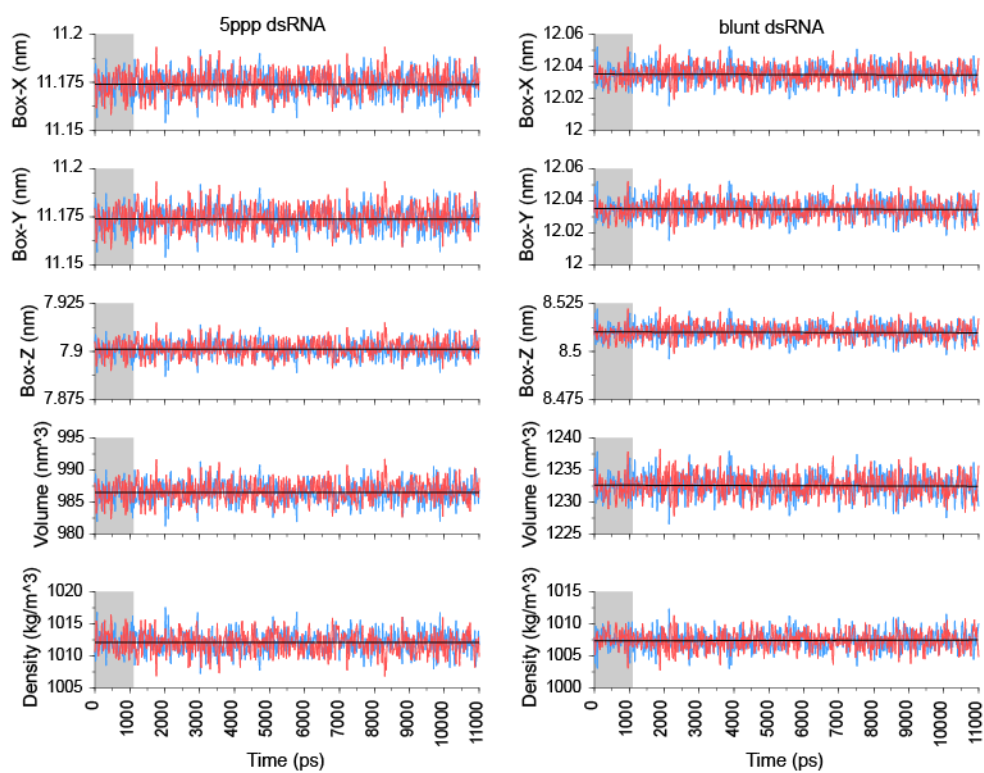

Figure S12 Part 3. ancMDA5/LGP2b.

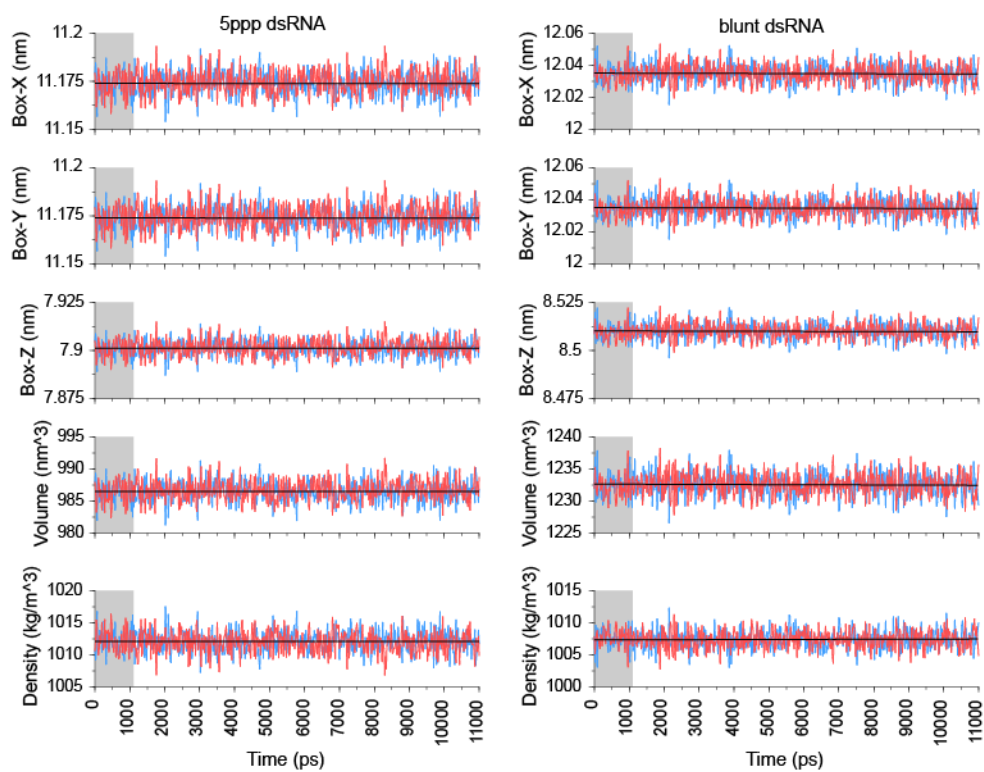

Figure S12 Part 4. ancMDA5/LGP2a.

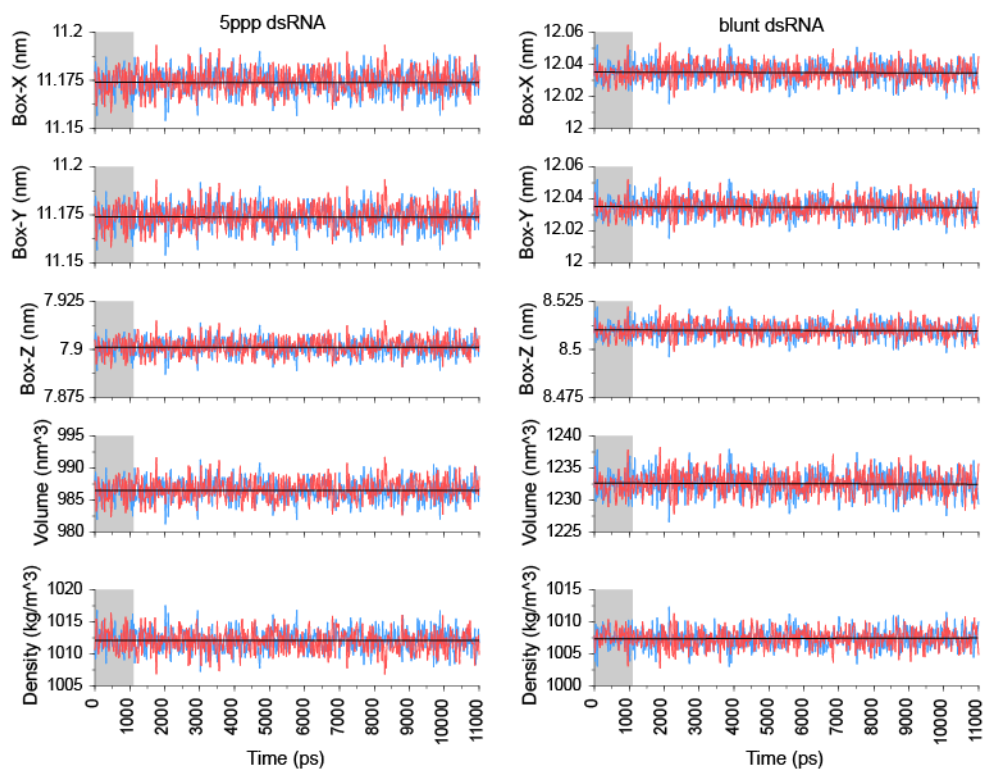

Figure S12 Part 5. ancRIG-I.





Figure S12 Part 6. ancRLR.



Figure S12 Part 7. ancMDA5/LGP2a<sup>H63S</sup>.



Figure S12 Part 8. ancMDA5/LGP2a<sup>TEE47ΔEK</sup>.

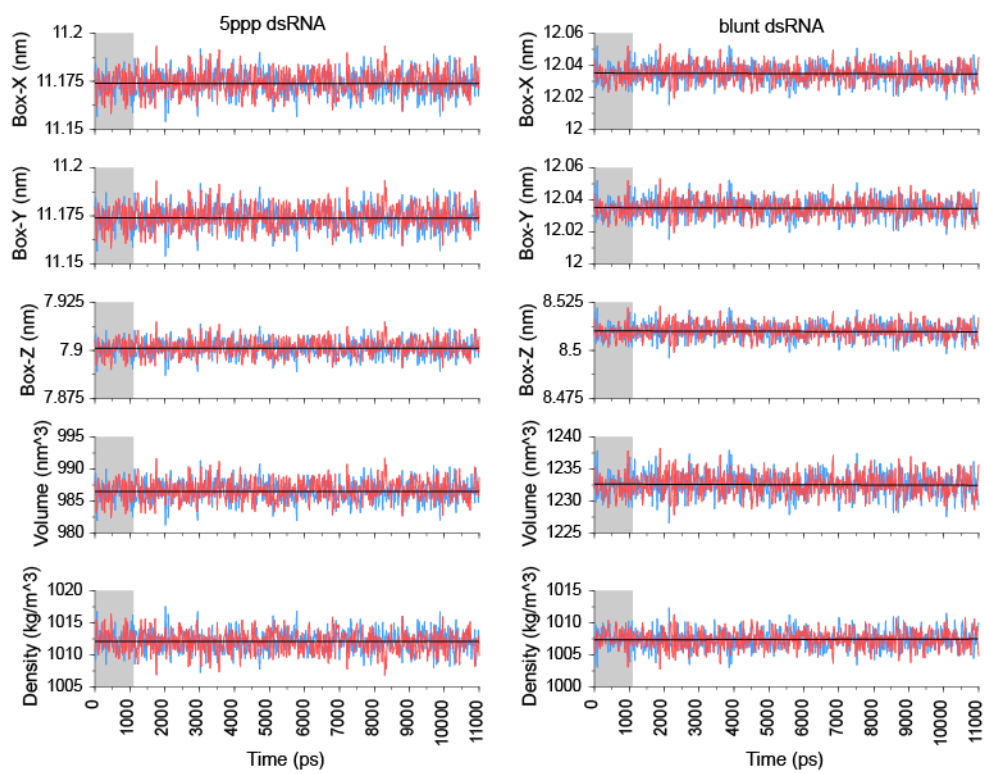

Figure S12 Part 9. ancRLR<sup>ΔEK47TEE,K88S</sup>

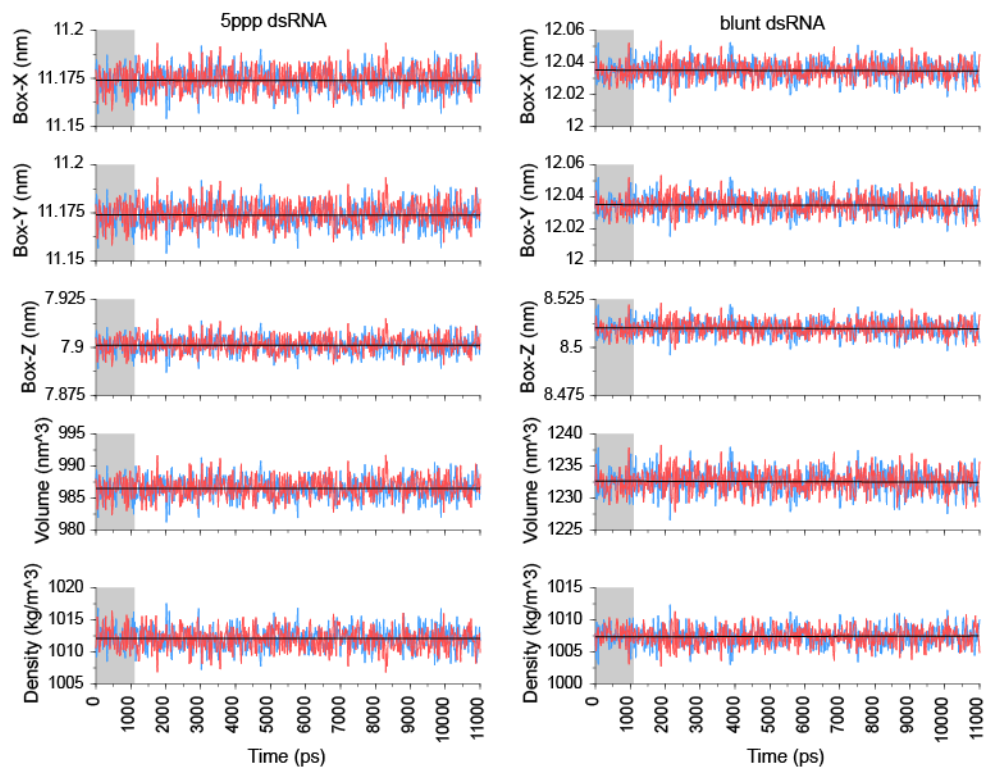

Figure S12 Part 10. Human LGP2.

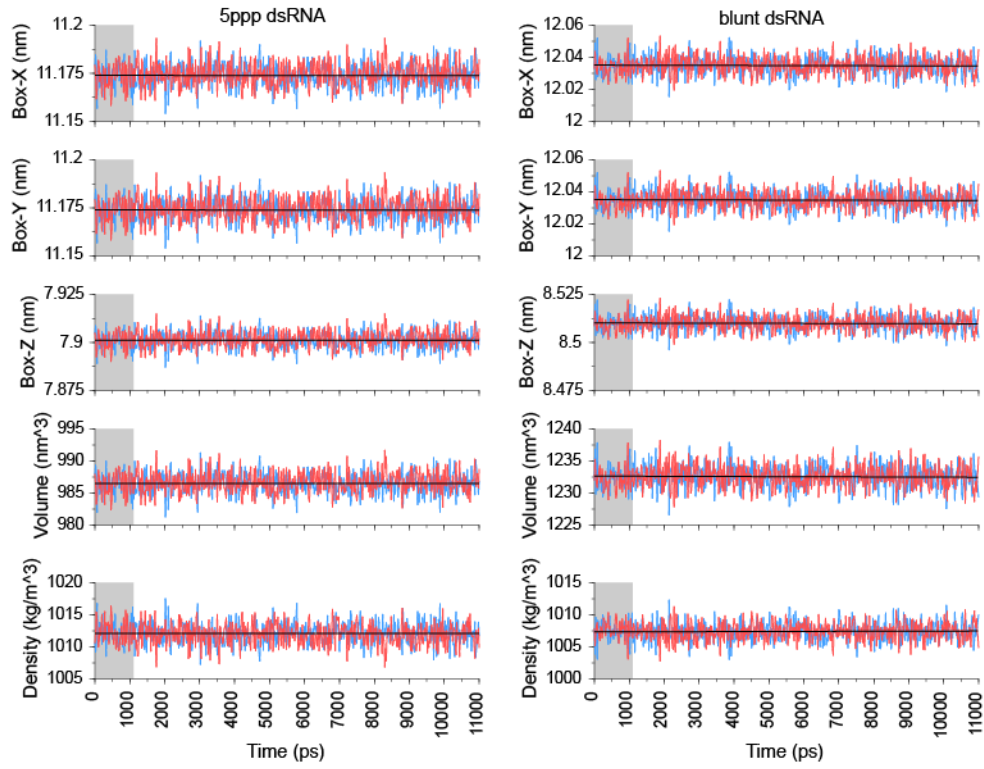

Figure S12 Part 11. Human MDA5.

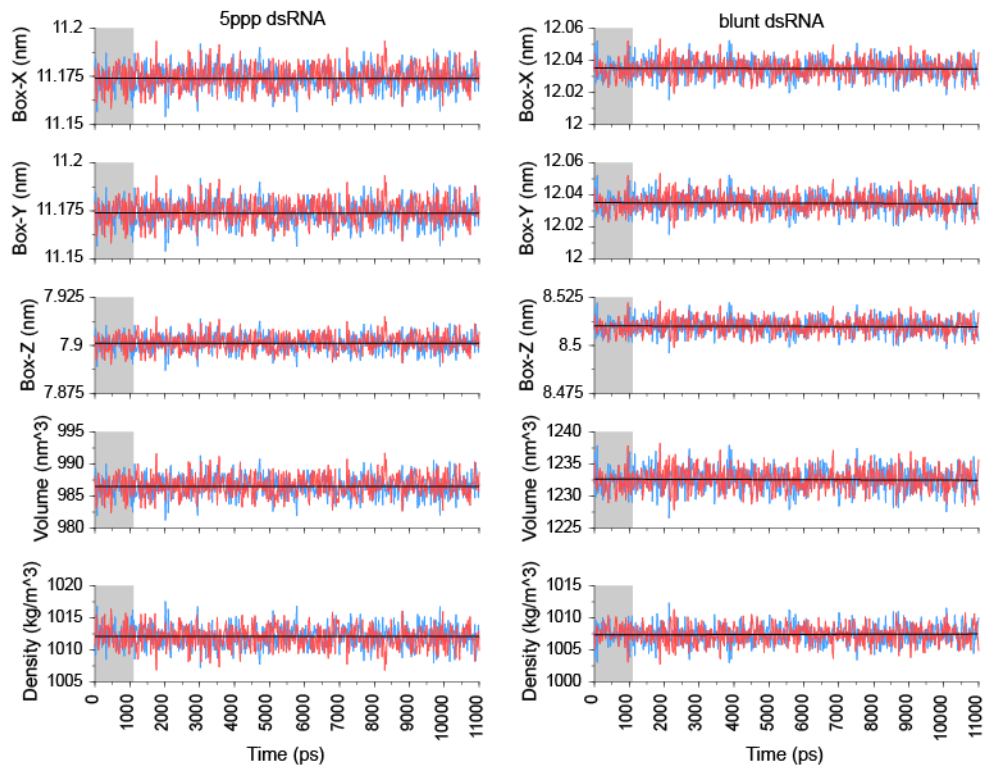

Figure S12 Part 12. Human RIG-I.

**Figure S12. Volumetric parameters were well-behaved across molecular dynamics simulations of human and ancestral RLR RDs bound to 5'ppp and blunt-ended dsRNA.** We plot the X, Y and Z dimensions of the simulated solvent box, as well as its volume and density, across the time course of each molecular dynamics simulation. Red and blue series indicate independent simulations of two RD proteins bound to either end of a double-stranded RNA molecule. We verified that characteristics of the RD-RNA complexes were less correlated between RDs in the same simulation than they were across simulations and considered each RD-RNA complex as an independent replicate for further analysis. Gray box indicates the first nanosecond of simulation, which we excluded from downstream analyses.

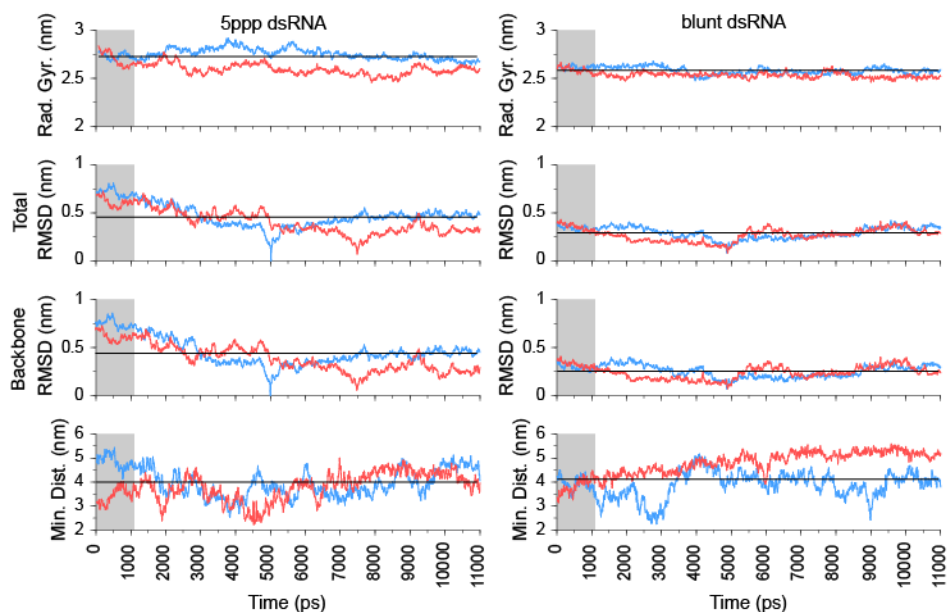

**Figure S13 Part 1. ancLGP2.**

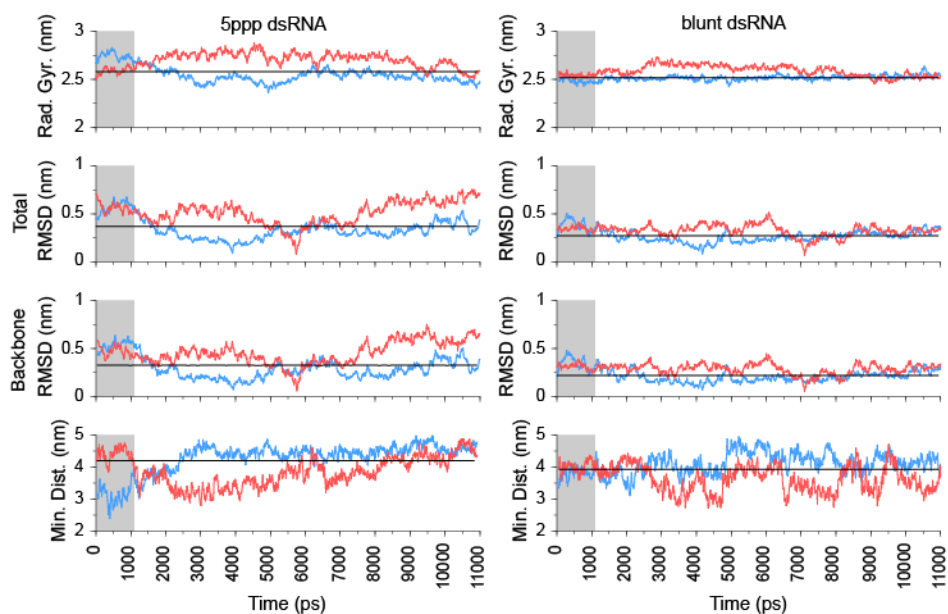

**Figure S13 Part 2. ancMDA5.**



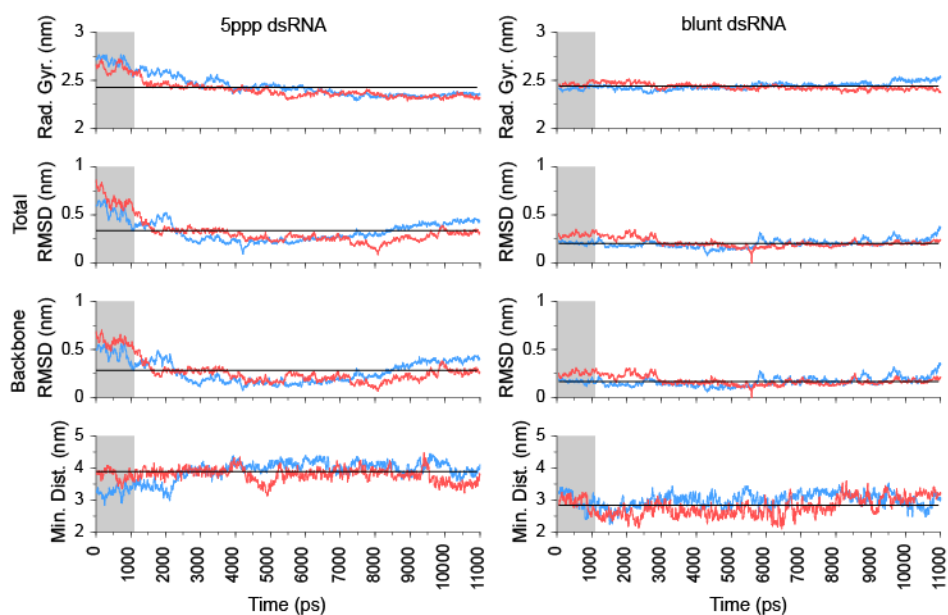

Figure S13 Part 3. ancMDA5/LGP2b.

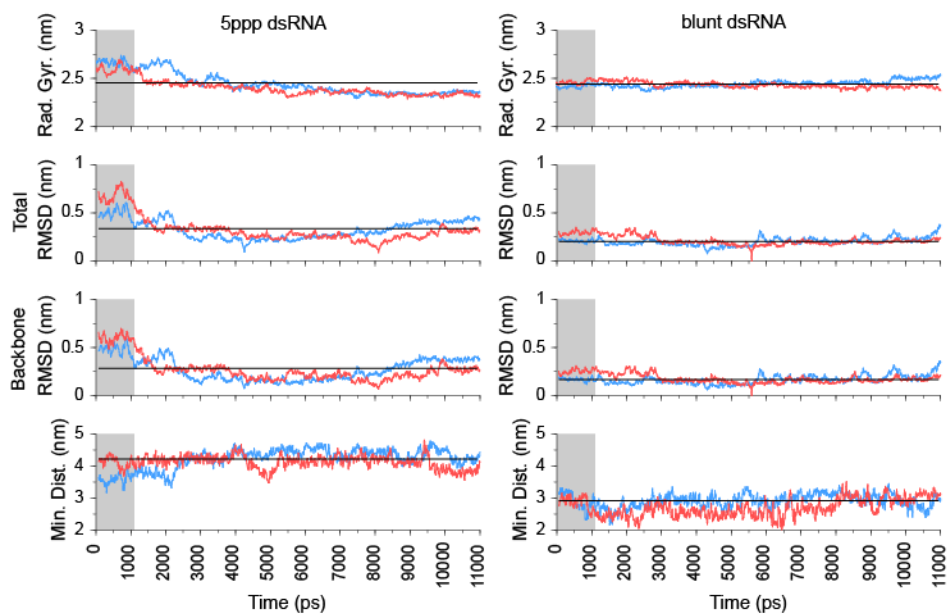

Figure S13 Part 4. ancMDA5/LGP2a.

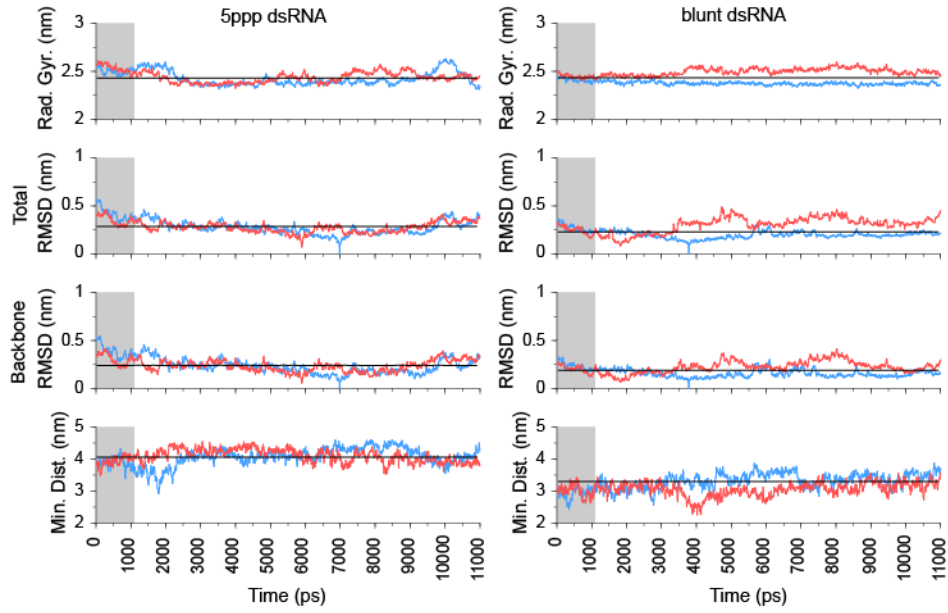

Figure S13 Part 5. ancRIG-I.

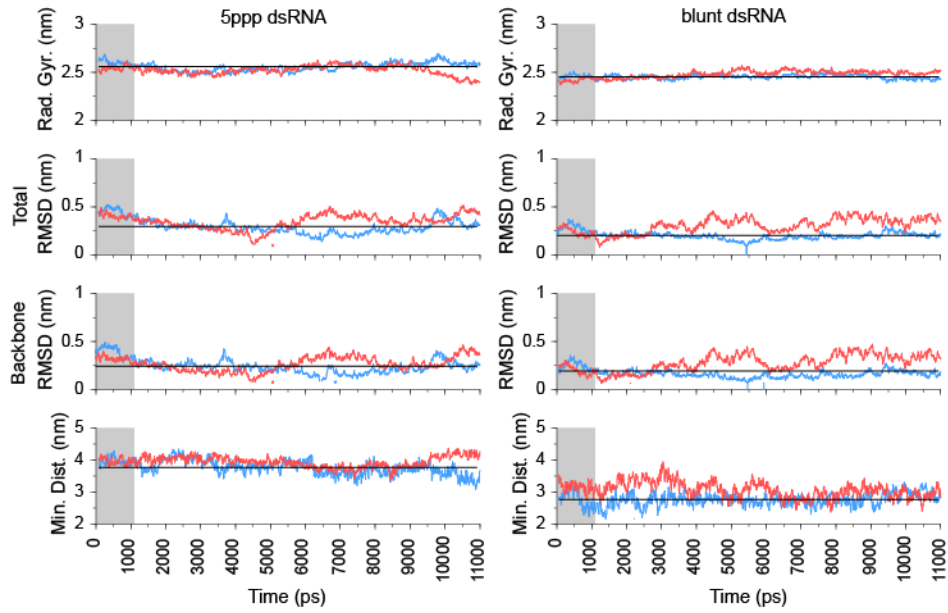

Figure S13 Part 6. ancRLR.

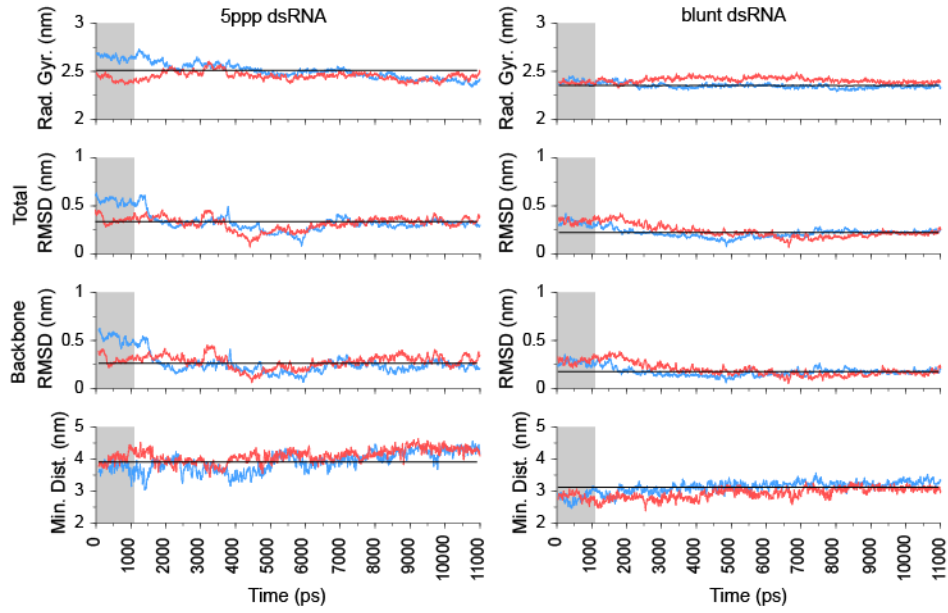

Figure S13 Part 7. ancMDA5/LGP2a<sup>H63S</sup>.

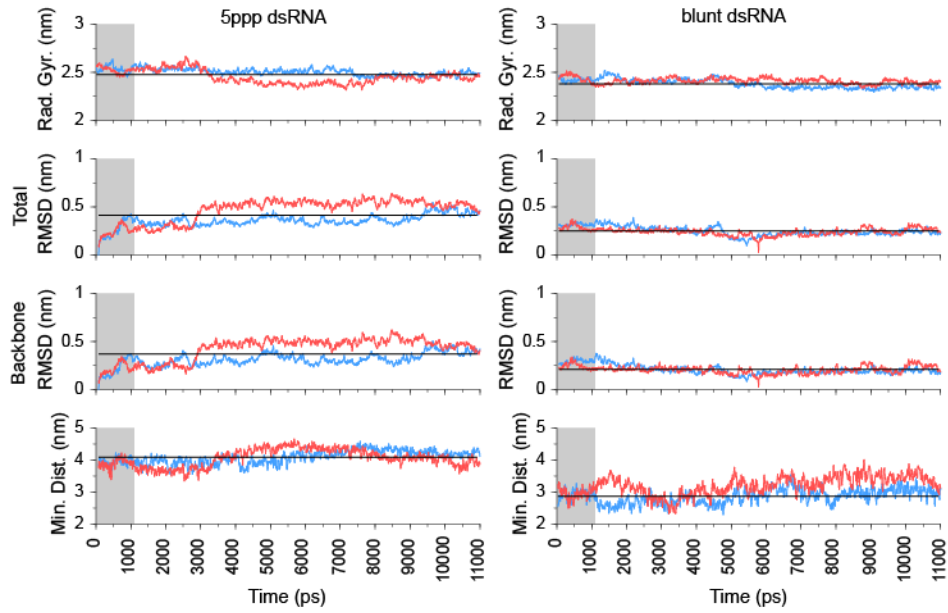

Figure S13 Part 8. ancMDA5/LGP2a<sup>TEE47ΔEK</sup>.



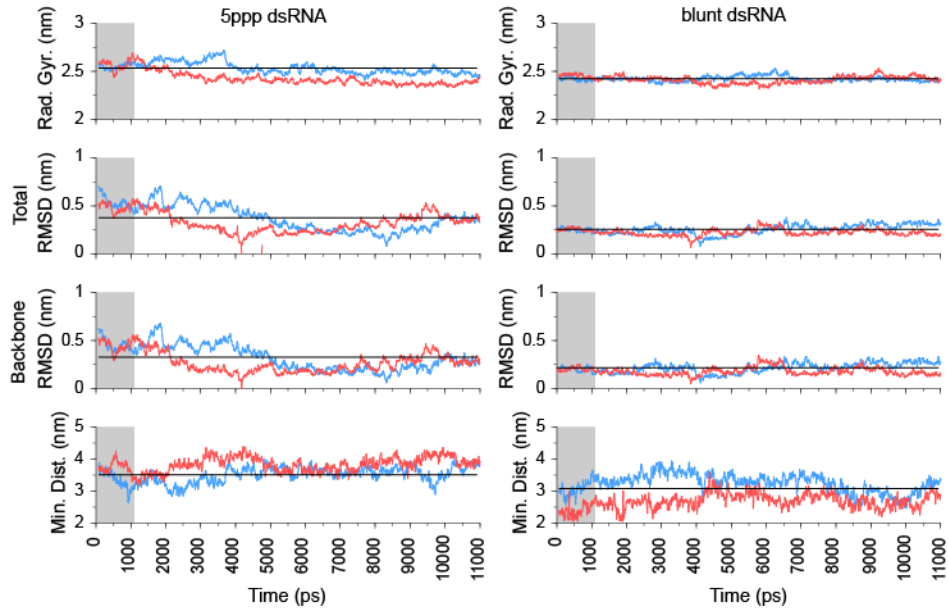

Figure S13 Part 9. ancRLR<sup>ΔEK47TEE,K88S</sup>.

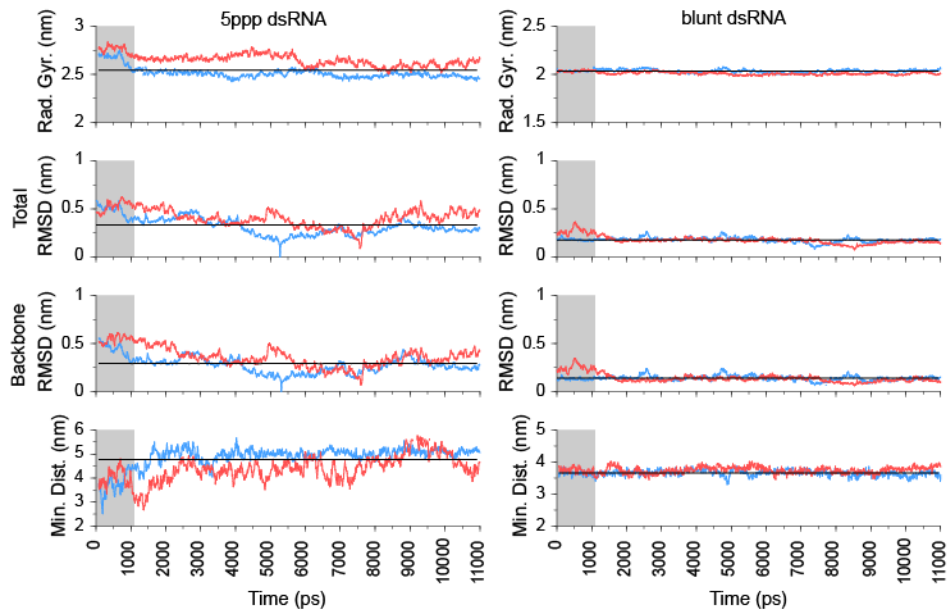

Figure S13 Part 10. Human LGP2.

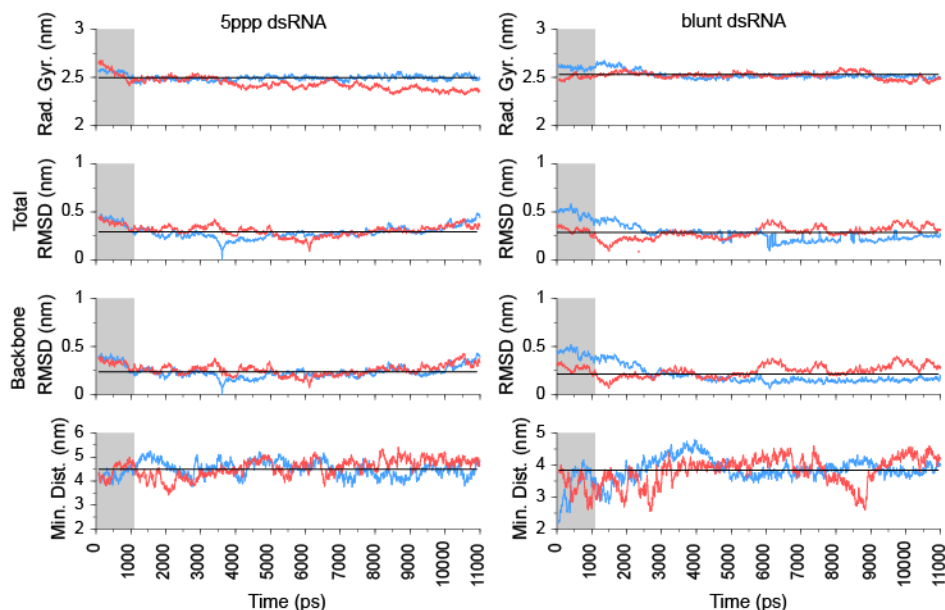

**Figure S13 Part 11. Human MDA5.**

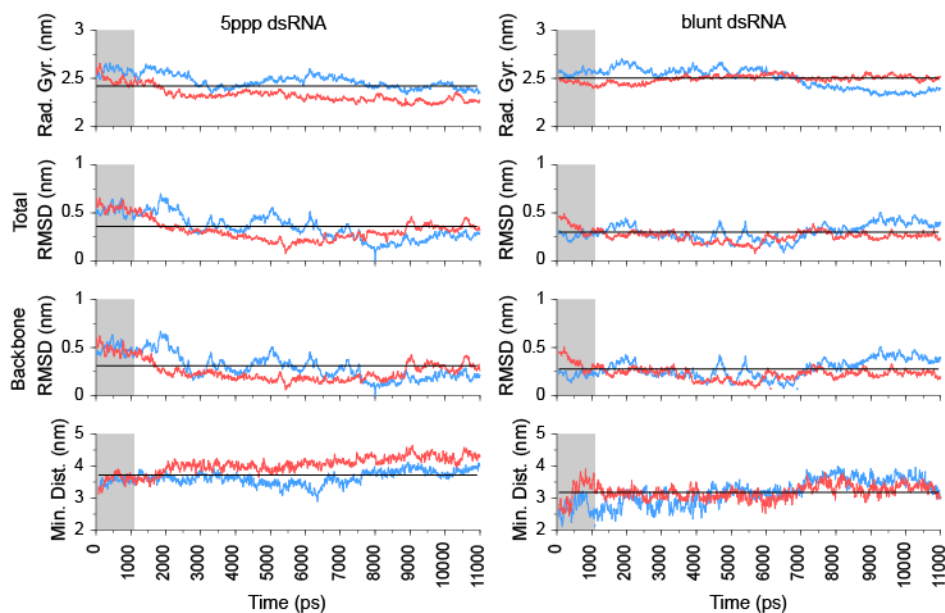

**Figure S13 Part 12. Human RIG-I.**

**Figure S13. Physical characteristics of the RLR-RNA complex were well-behaved across molecular dynamics simulations of human and ancestral RLR RDs bound to 5'ppp and blunt-ended dsRNA.** We plot the radius of gyration, total and background RMSD and minimum atom-atom distance, across the time course of each molecular dynamics simulation. Red and blue series indicate independent simulations of two RD proteins bound to either end of a double-stranded RNA molecule. We verified that characteristics of the RD-RNA complexes were less correlated between RDs in the same simulation than they were across simulations and considered each RD-RNA complex as an independent replicate for further analysis. Gray box indicates the first nanosecond of simulation, which we excluded from downstream analyses.

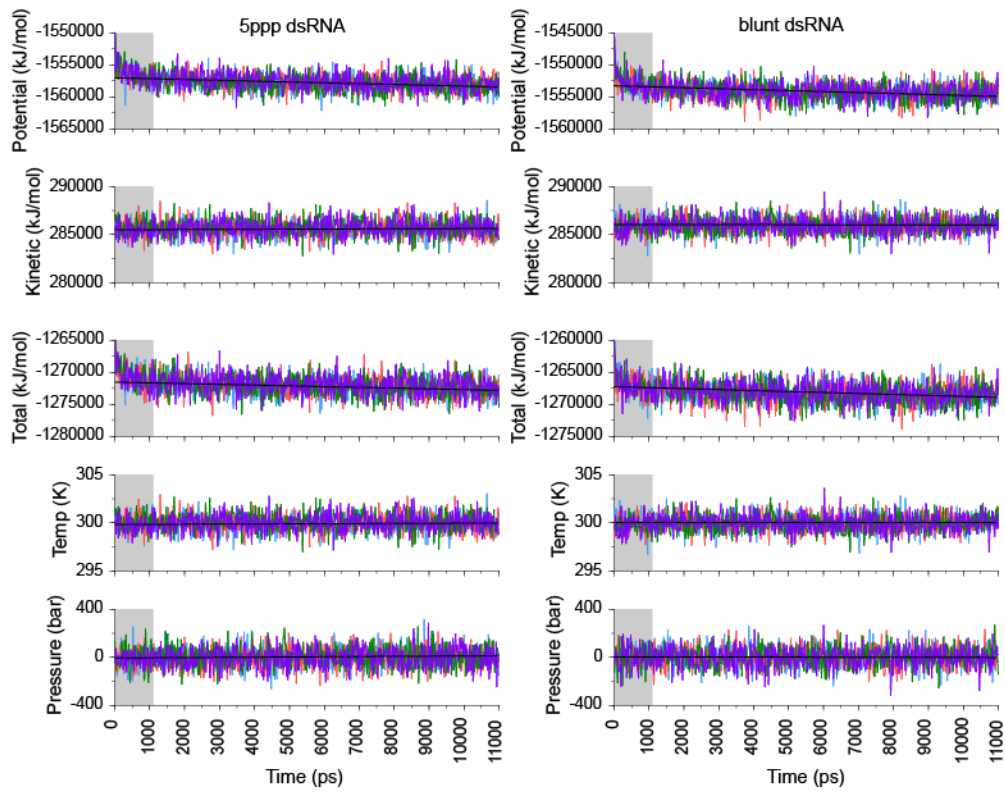

Figure S14 Part 1. ancMDA5/LGP2b.

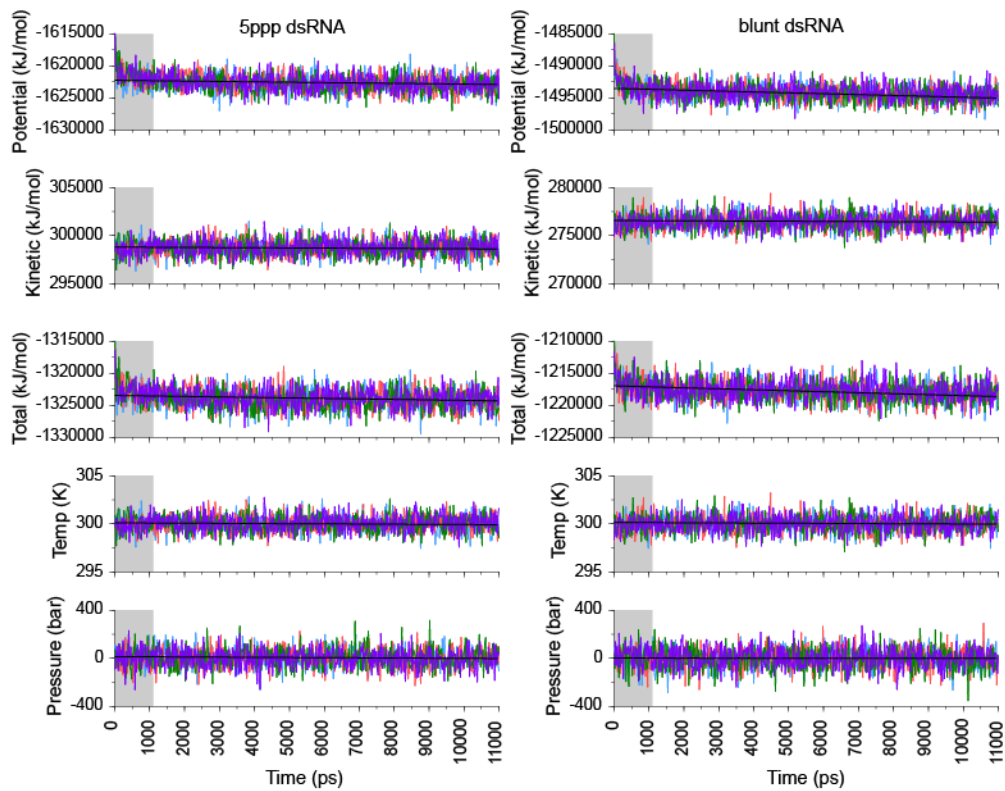

**Figure S14 Part 2. ancMDA5/LGP2a.**

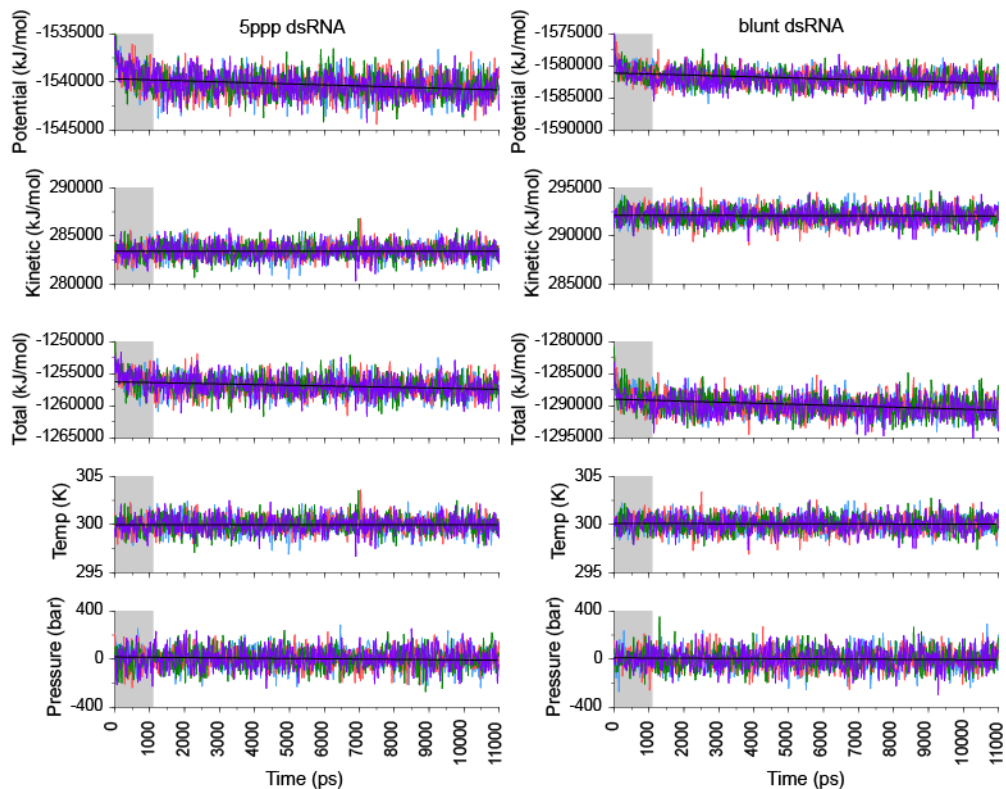

**Figure S14 Part 3. ancRLR.**

**Figure S14. Energy parameters were well-behaved across molecular dynamics simulations of ancestral RLR helicase+pincer+RD domains bound to 5'ppp and blunt-ended dsRNA.** We plot potential, kinetic and total energy, as well as temperature and pressure, across the time course of each molecular dynamics simulation. Each series indicates an independent simulation of one helicase+pincer+RD protein bound to a double-stranded RNA molecule. Gray box indicates the first nanosecond of simulation, which we excluded from downstream analyses.

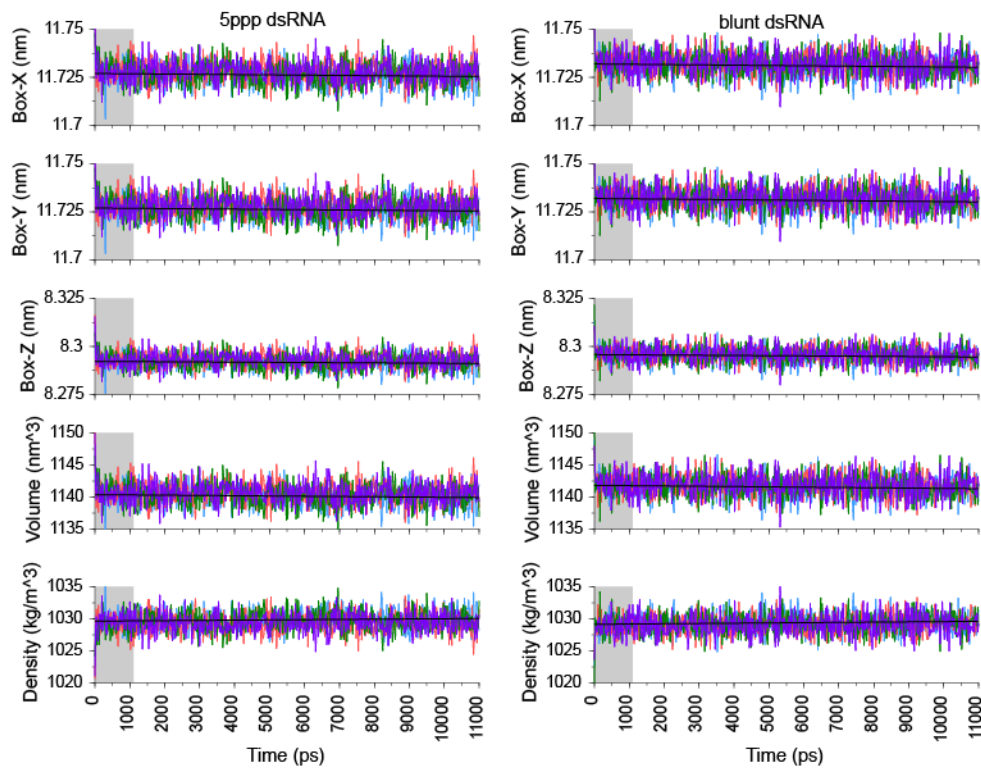

Figure S15 Part 1. ancMDA5/LGP2b.

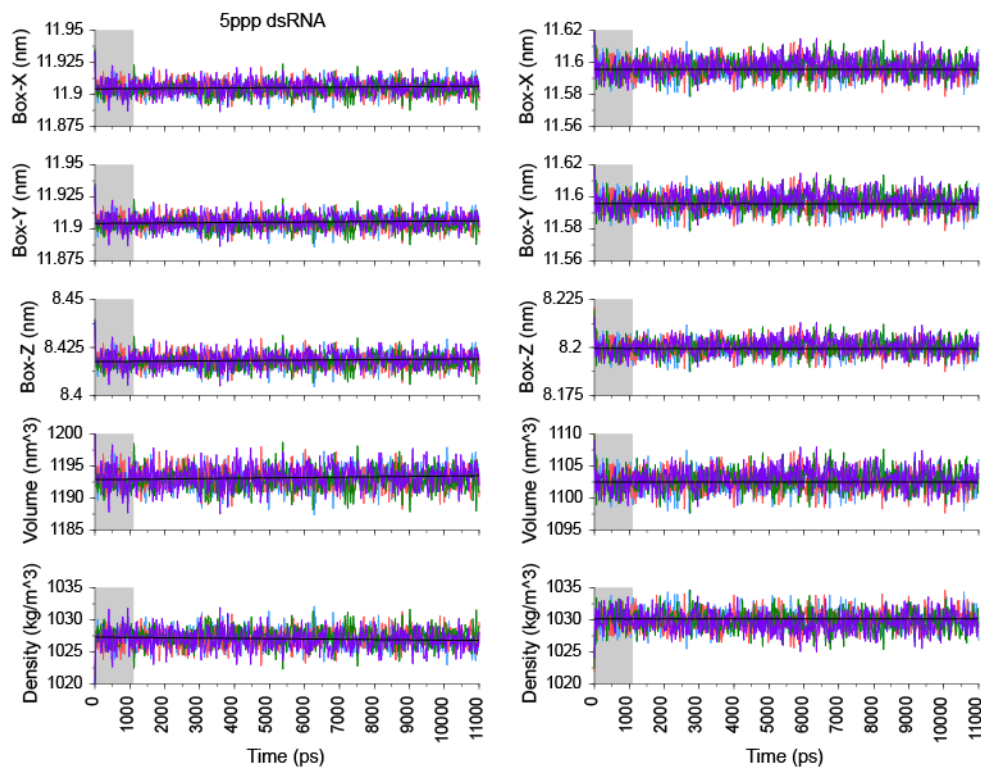

Figure S15 Part 2. ancMDA5/LGP2a.



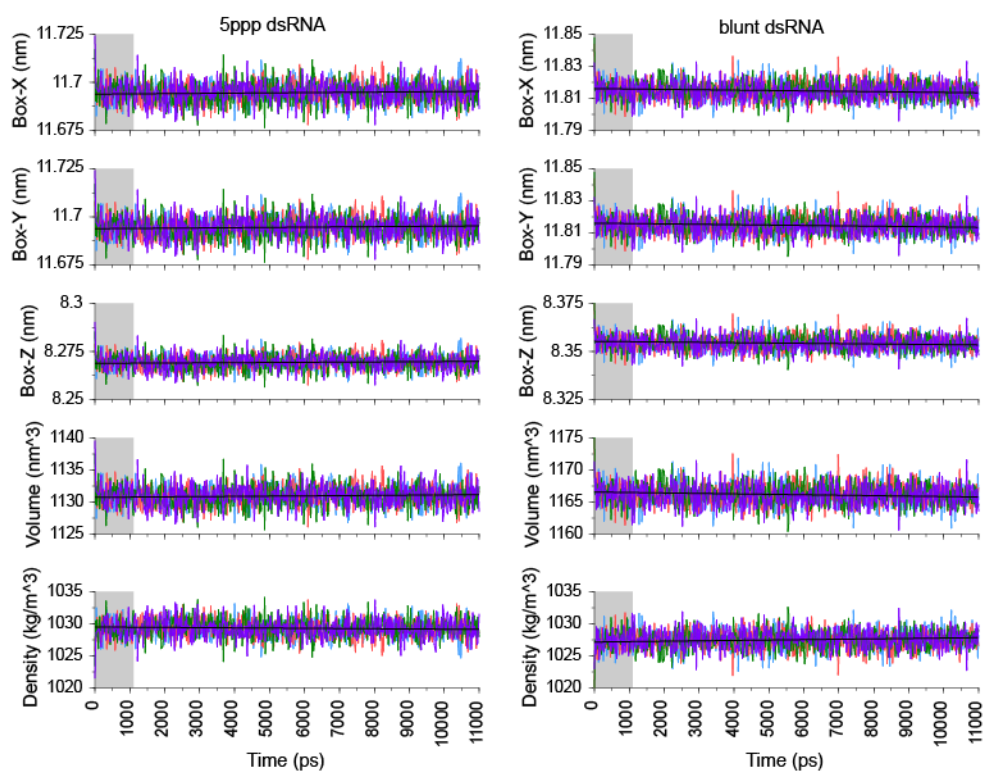

**Figure S15 Part 3. ancRLR.**

**Figure S15. Volumetric parameters were well-behaved across molecular dynamics simulations of ancestral RLR helicase+pincer+RD domains bound to 5'ppp and blunt-ended dsRNA.** We plot the X, Y and Z dimensions of the simulated solvent box, as well as its volume and density, across the time course of each molecular dynamics simulation. Each series indicates an independent simulation of one helicase+pincer+RD protein bound to a double-stranded RNA molecule. Gray box indicates the first nanosecond of simulation, which we excluded from downstream analyses.

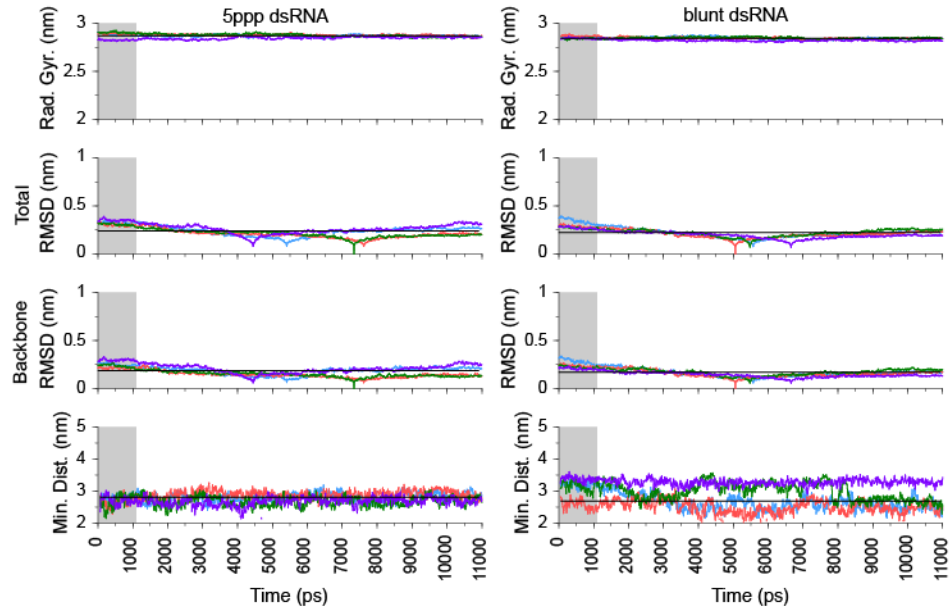

Figure S16 Part 1. ancMDA5/LGP2b.

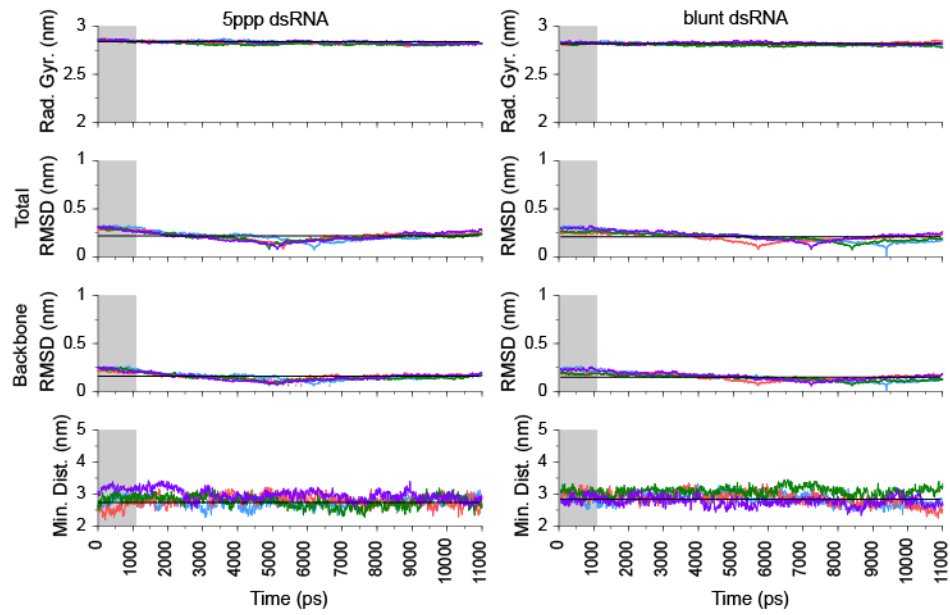

Figure S16 Part 2. ancMDA5/LGP2a.

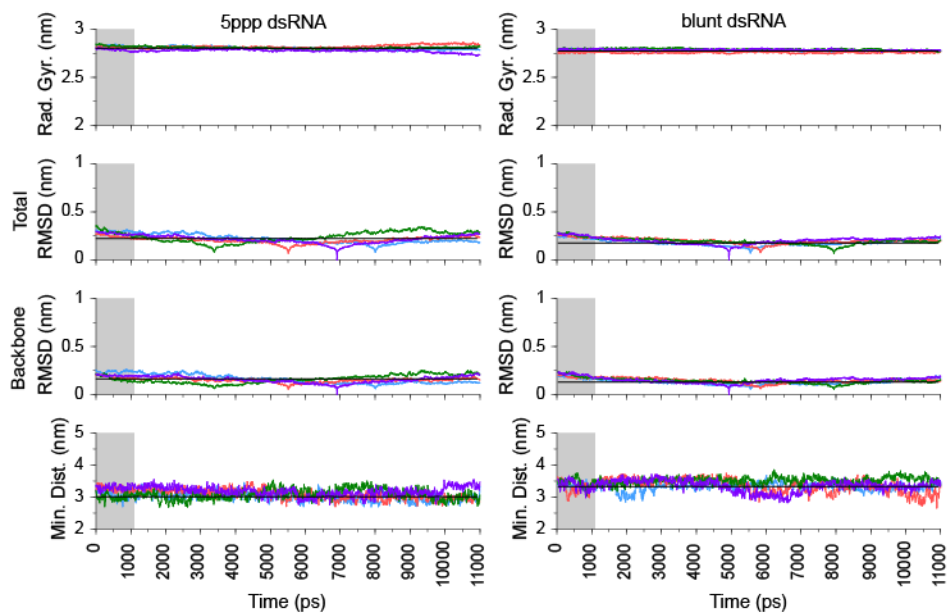

**Figure S16 Part 3. ancRLR.**

**Figure S16. Physical characteristics of the RLR-RNA complex were well-behaved across molecular dynamics simulations of ancestral RLR helicase+pincer+RD domains bound to 5'ppp and blunt-ended dsRNA.** We plot the radius of gyration, total and background RMSD and minimum atom-atom distance, across the time course of each molecular dynamics simulation. Each series indicates an independent simulation of one helicase+pincer+RD protein bound to a double-stranded RNA molecule. Gray box indicates the first nanosecond of simulation, which we excluded from downstream analyses.



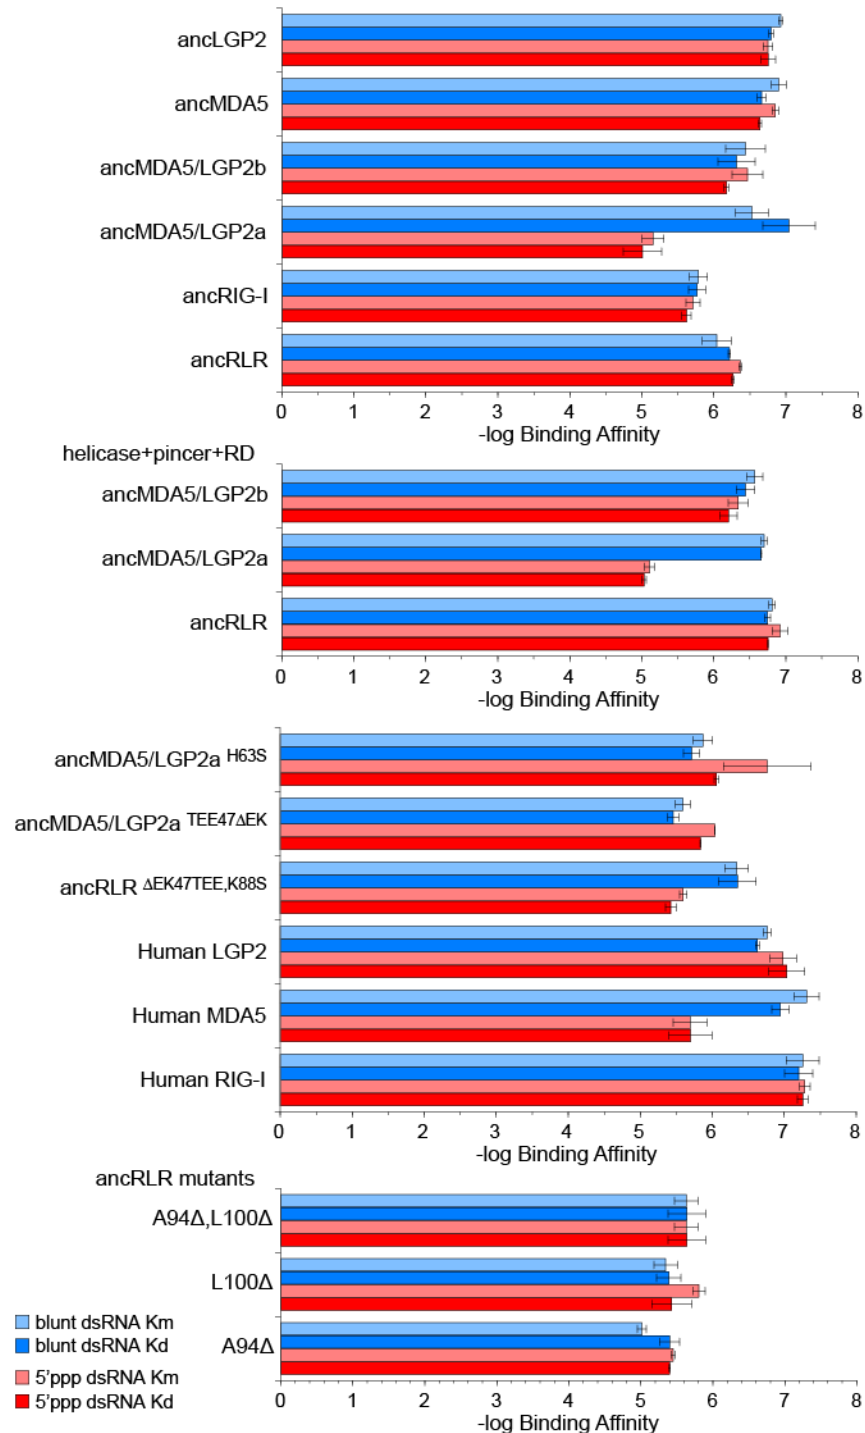

**Figure S17. We summarize binding kinetics results for all ancestral, human and mutant RLR constructs used in the study.** We measured the steady-state binding affinities (Kd, dark series) and initial RNA binding rates (Km, light series) of ancestral, mutant, and human RLRs bound to blunt-ended (blue) and 5'ppp dsRNA (red) using a label-free kinetics assay (see Methods). For each RLR and RNA type we plot  $-\log$  binding affinities, with longer bars indicating stronger affinity. Standard errors over three replicates are indicated. Constructs other than those listed as “helicase+pincer+RD” consisted of only the RD domain.

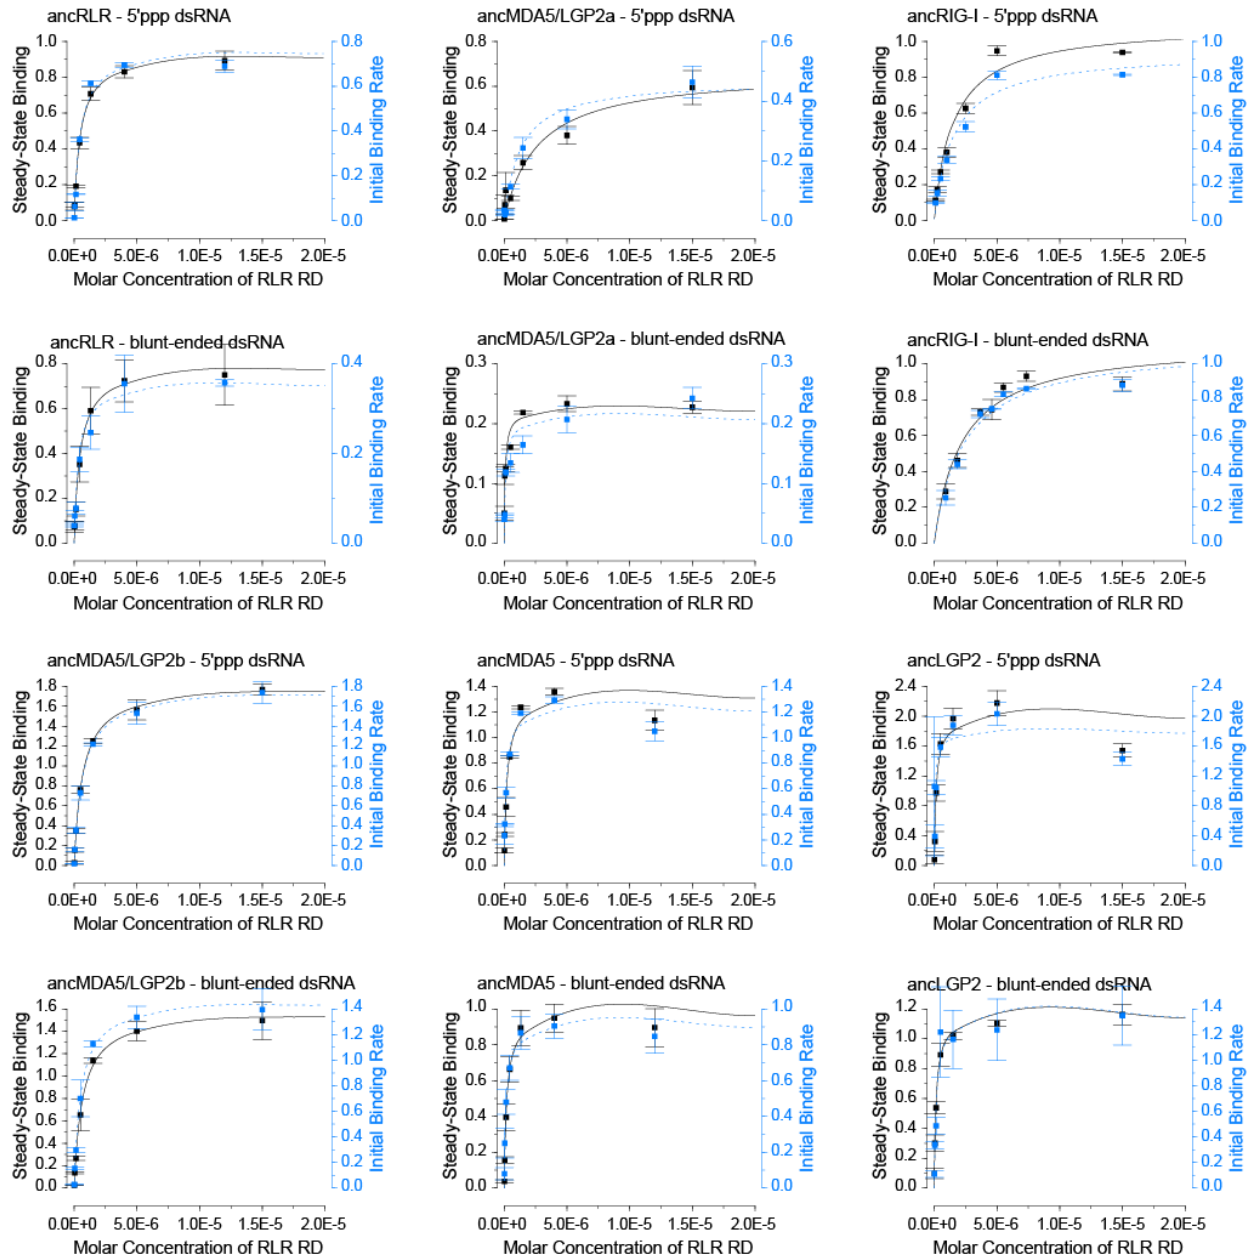

Figure S18, Part 1.

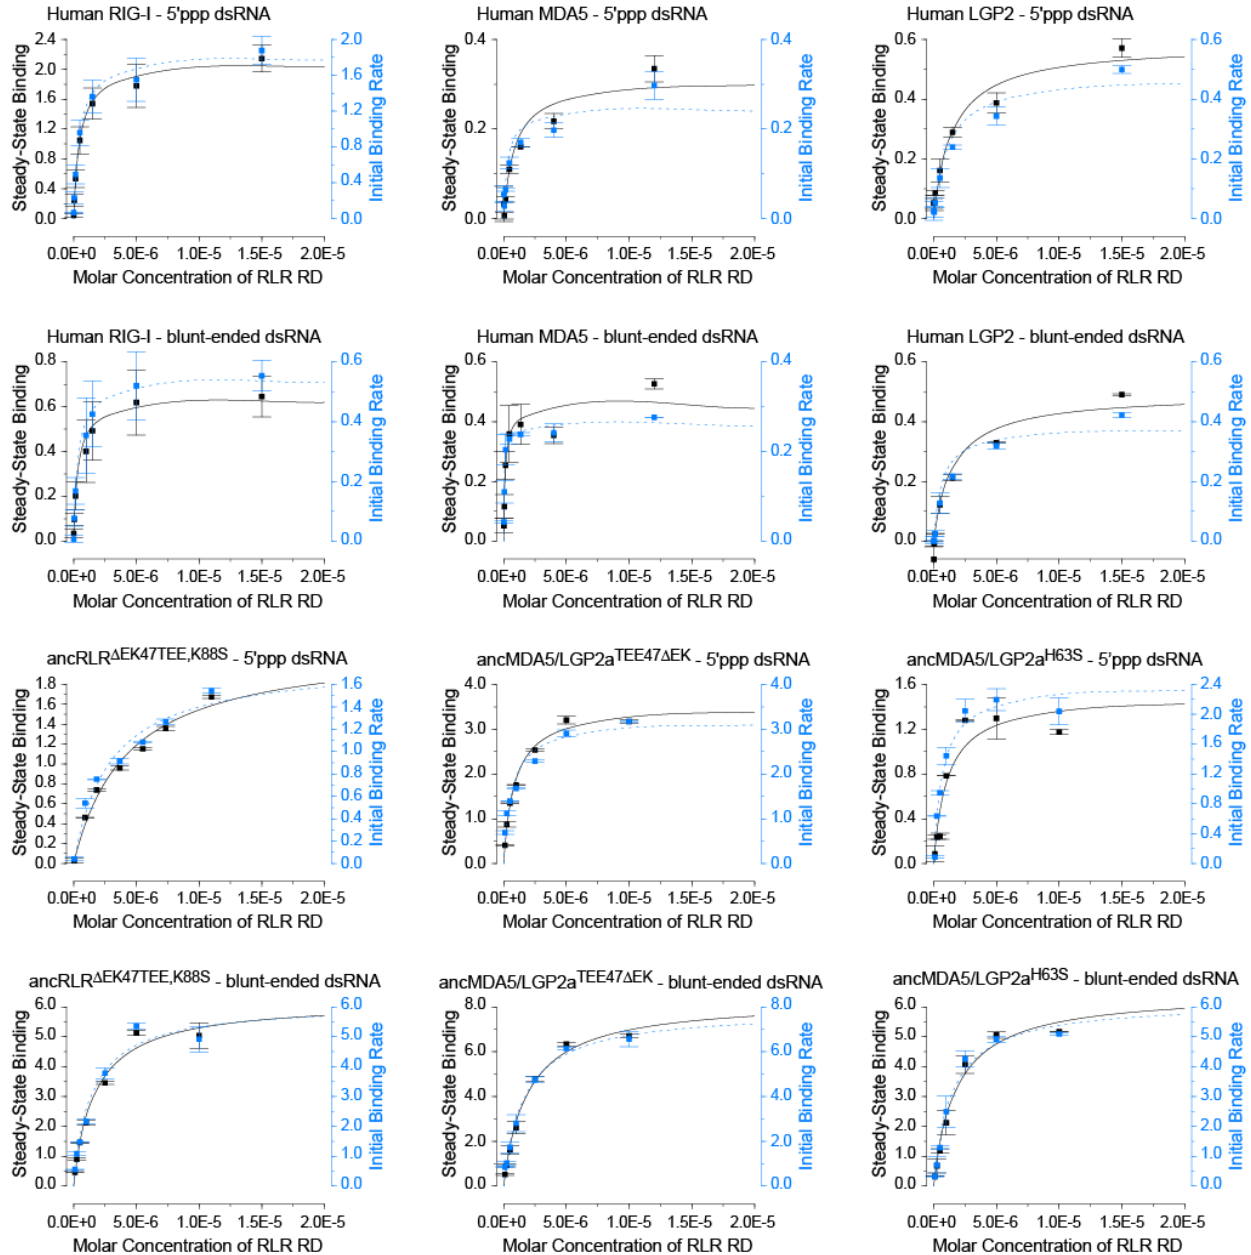

**Figure S18. We show binding kinetics curves for all ancestral, human and mutant RLR RDs used in the study.** We measured the steady-state binding affinities ( $K_d$ , black dots) and initial RNA binding rates ( $K_m$ , blue dots) of ancestral, mutant and human RLR RDs bound to blunt-ended and 5'ppp dsRNA molecules (see Methods). For each RD and RNA, we plot the average and standard error in RD-RNA binding across RD concentration. We used nonlinear regression to fit a single-site binding curve to each plot.

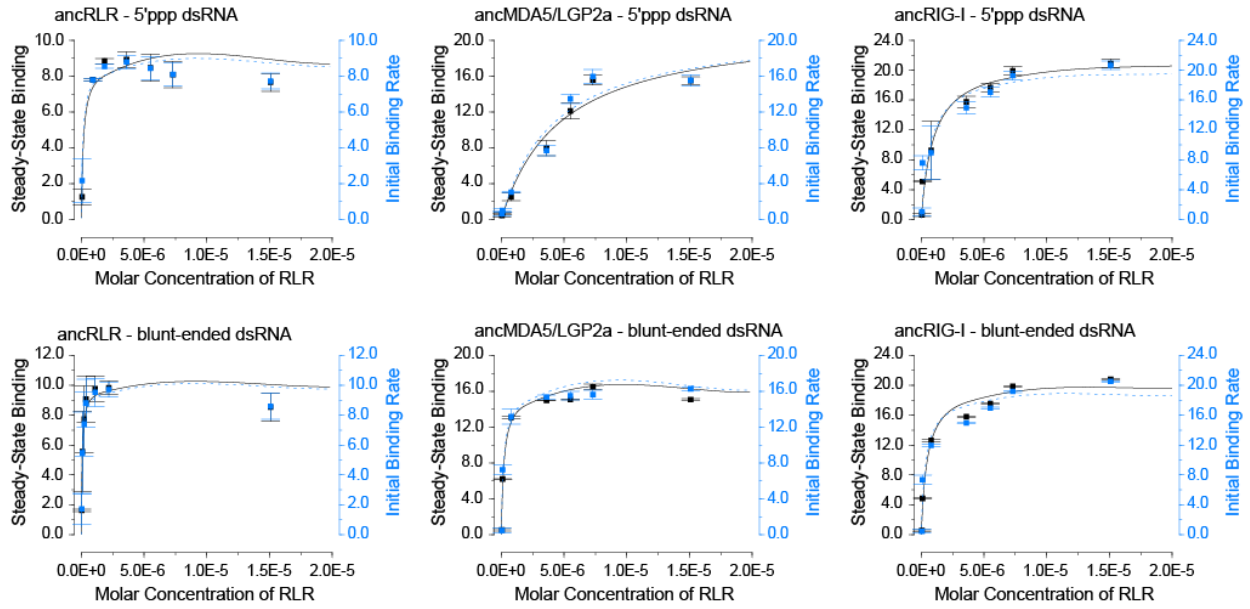

**Figure S19. We show binding kinetics curves for all ancestral RLR helicase+pincer+RDs used in the study.** We measured the steady-state binding affinities ( $K_d$ , black dots) and initial RNA binding rates ( $K_m$ , blue dots) of ancestral RLR helicase+pincer+RD constructs bound to blunt-ended and 5'ppp dsRNA molecules (see Methods). For each RLR and RNA, we plot the average and standard error in RLR-RNA binding across RLR concentration. We used nonlinear regression to fit a single-site binding curve to each plot.

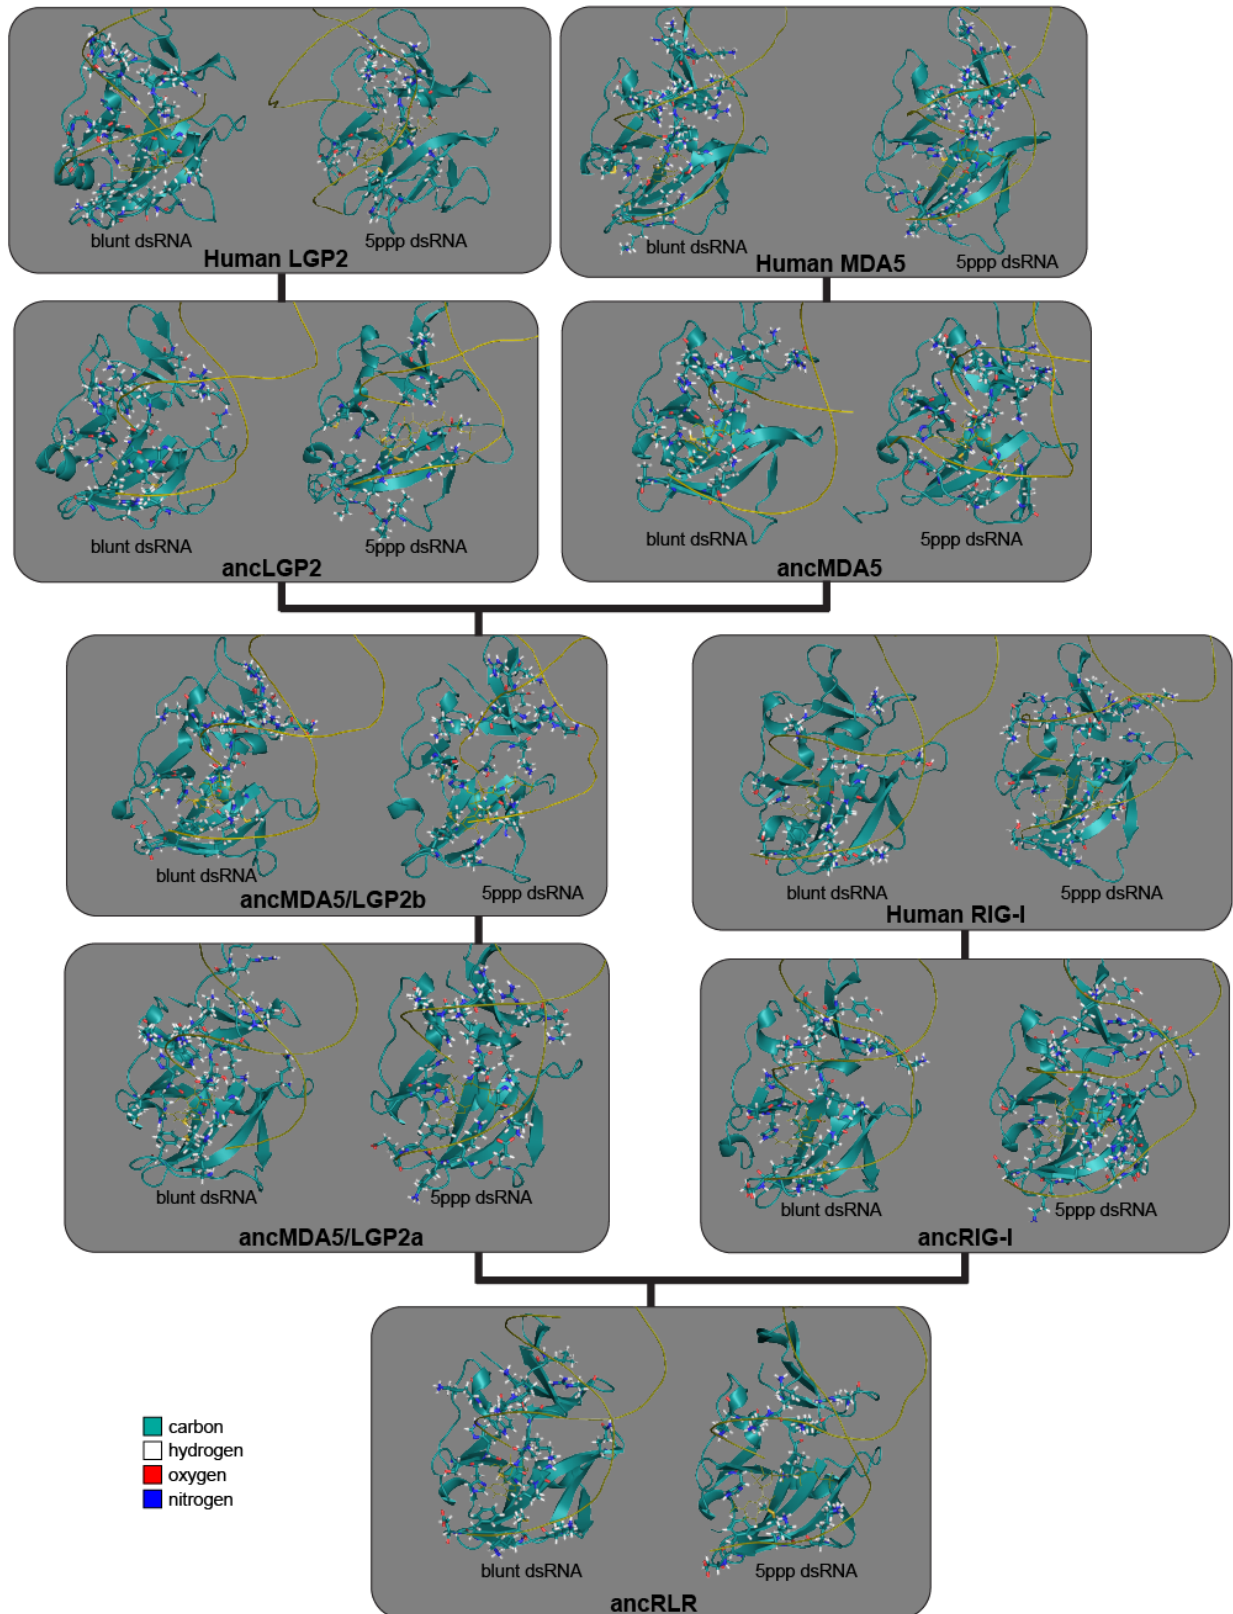

**Figure S20. Ionizable residues nearby RNA ligands are heavily protonated during molecular dynamics simulations.** We show the central structure of each RD-RNA from replicate molecular

dynamics simulations. Residues within 4 angstroms of the RNA are shown as stick models, with atoms colored according to type.

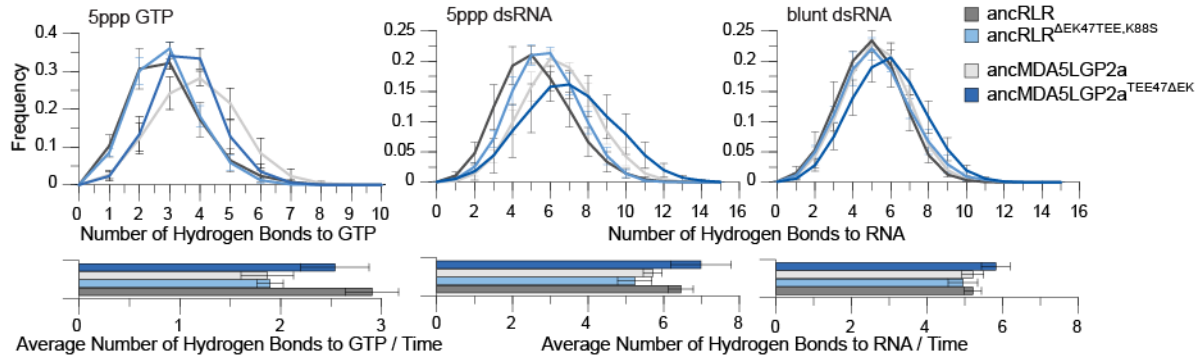

**Figure S21. Hydrogen bonding between ancestral RNA recognition domains (RDs) and RNA ligands changes from ancRLR to ancMDA5/LGP2a.** We performed replicate molecular dynamics simulations of each ancestral or mutant RLR RD bound to blunt-ended or 5'ppp dsRNA (see Methods). Top panels plot the proportion of simulation samples from which we observed each number of hydrogen bonds between the RD and its RNA ligand, with bars indicating standard errors. Bottom panels plot the average and standard error of the number of hydrogen bonds between the RD and its RNA ligand over all sampled molecular dynamics time points.



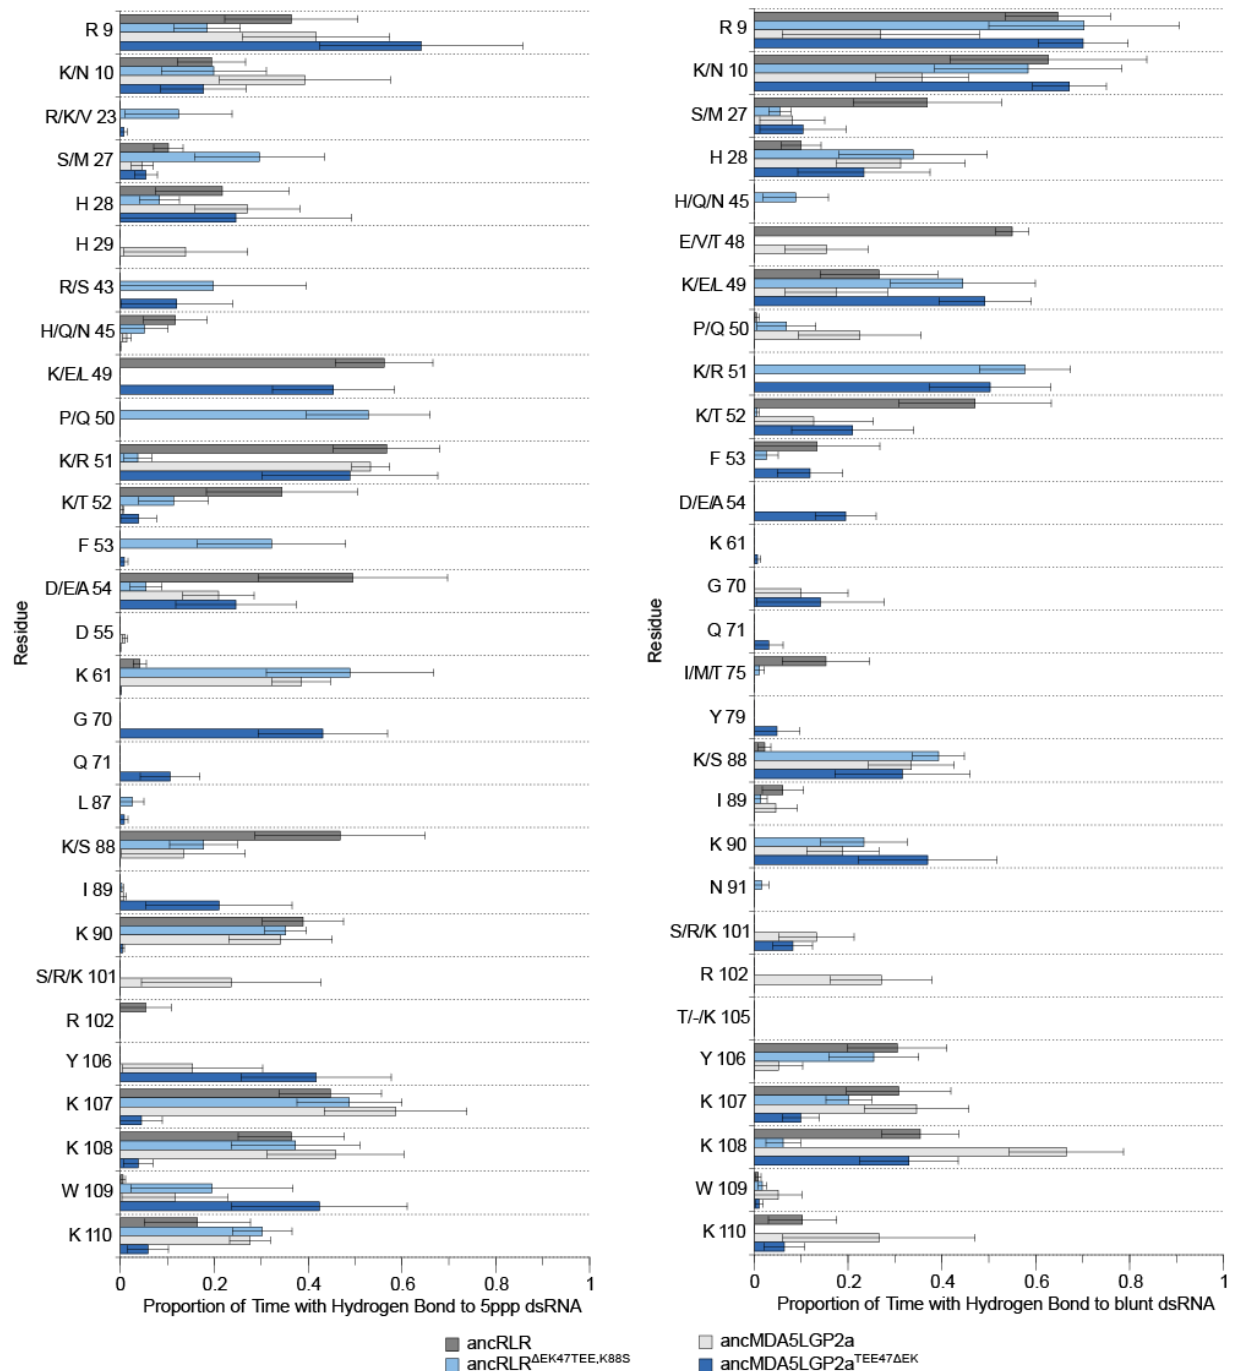

**Figure S22. The capacity of specific residues to form hydrogen bonds to the RNA ligand changes between ancRLR and ancMDA5/LGP2a.** We performed replicate molecular dynamics simulations of each RLR RD bound to blunt-ended and 5'ppp dsRNA (see Methods). We plot the average proportion of time each residue formed hydrogen bonds with its RNA ligand over the course of molecular dynamics simulations. Bars indicate standard errors over four replicate dynamics simulations.

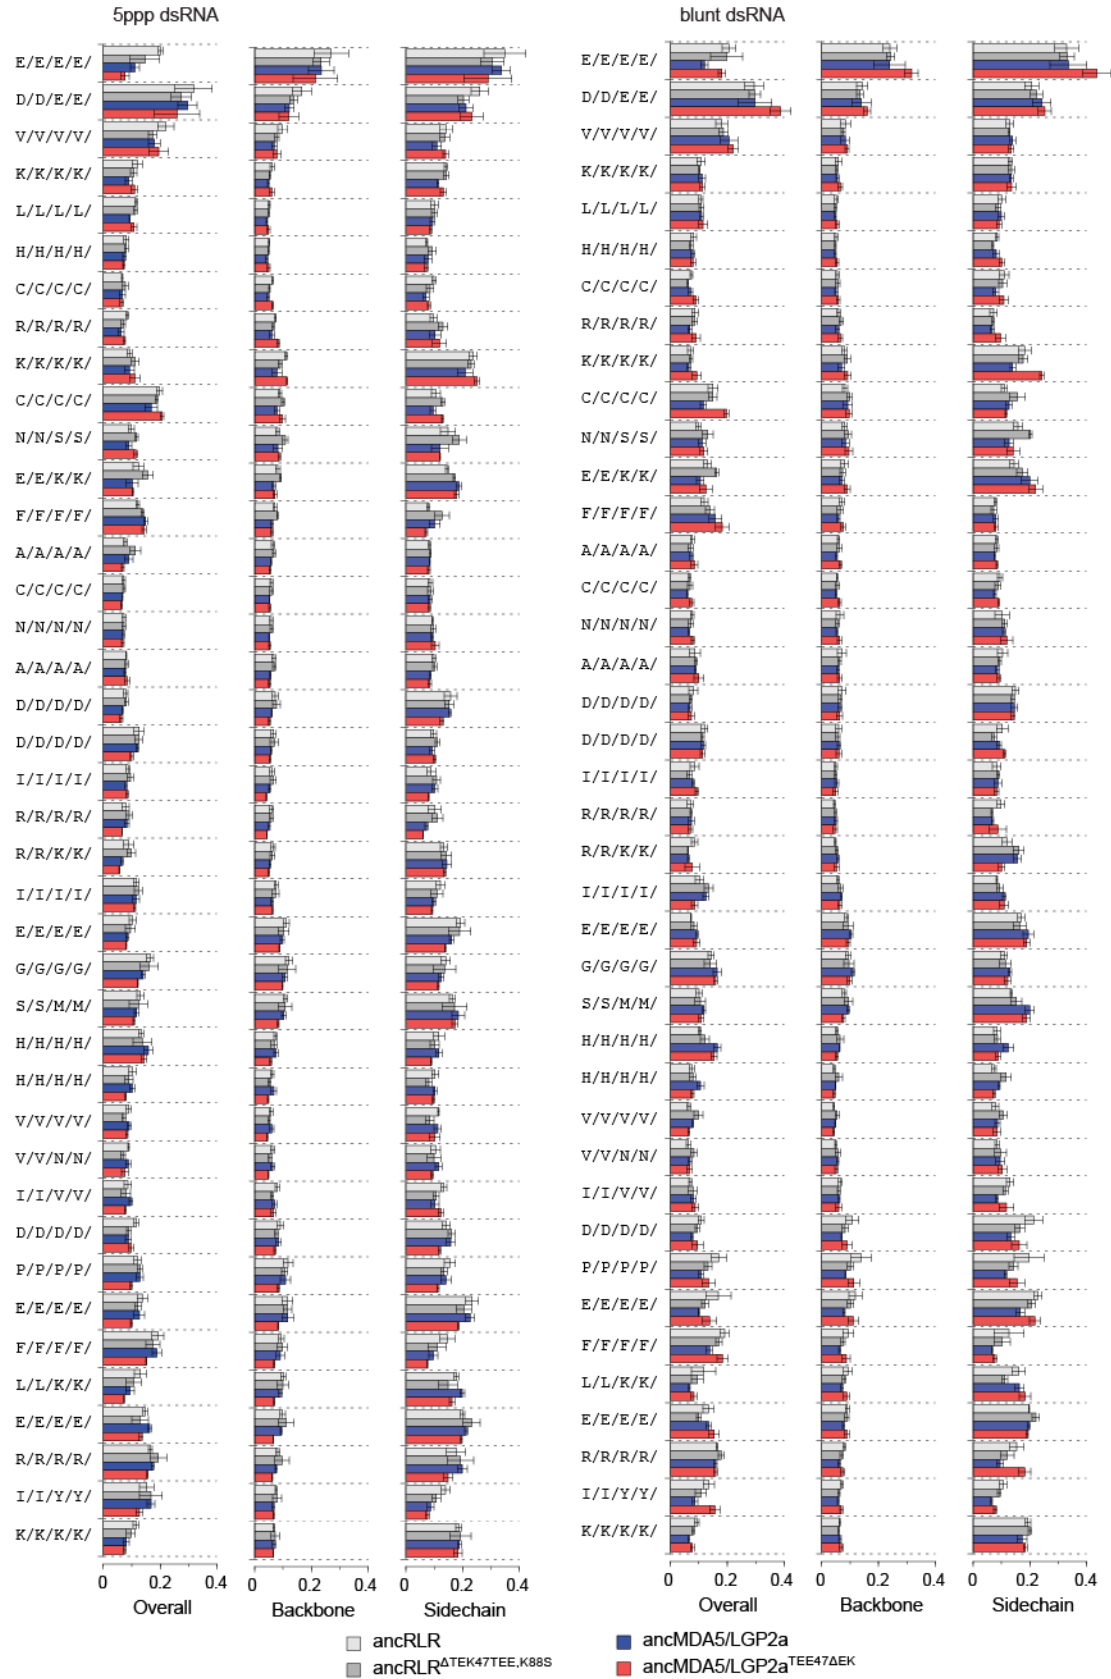

Figure S23, part 1.

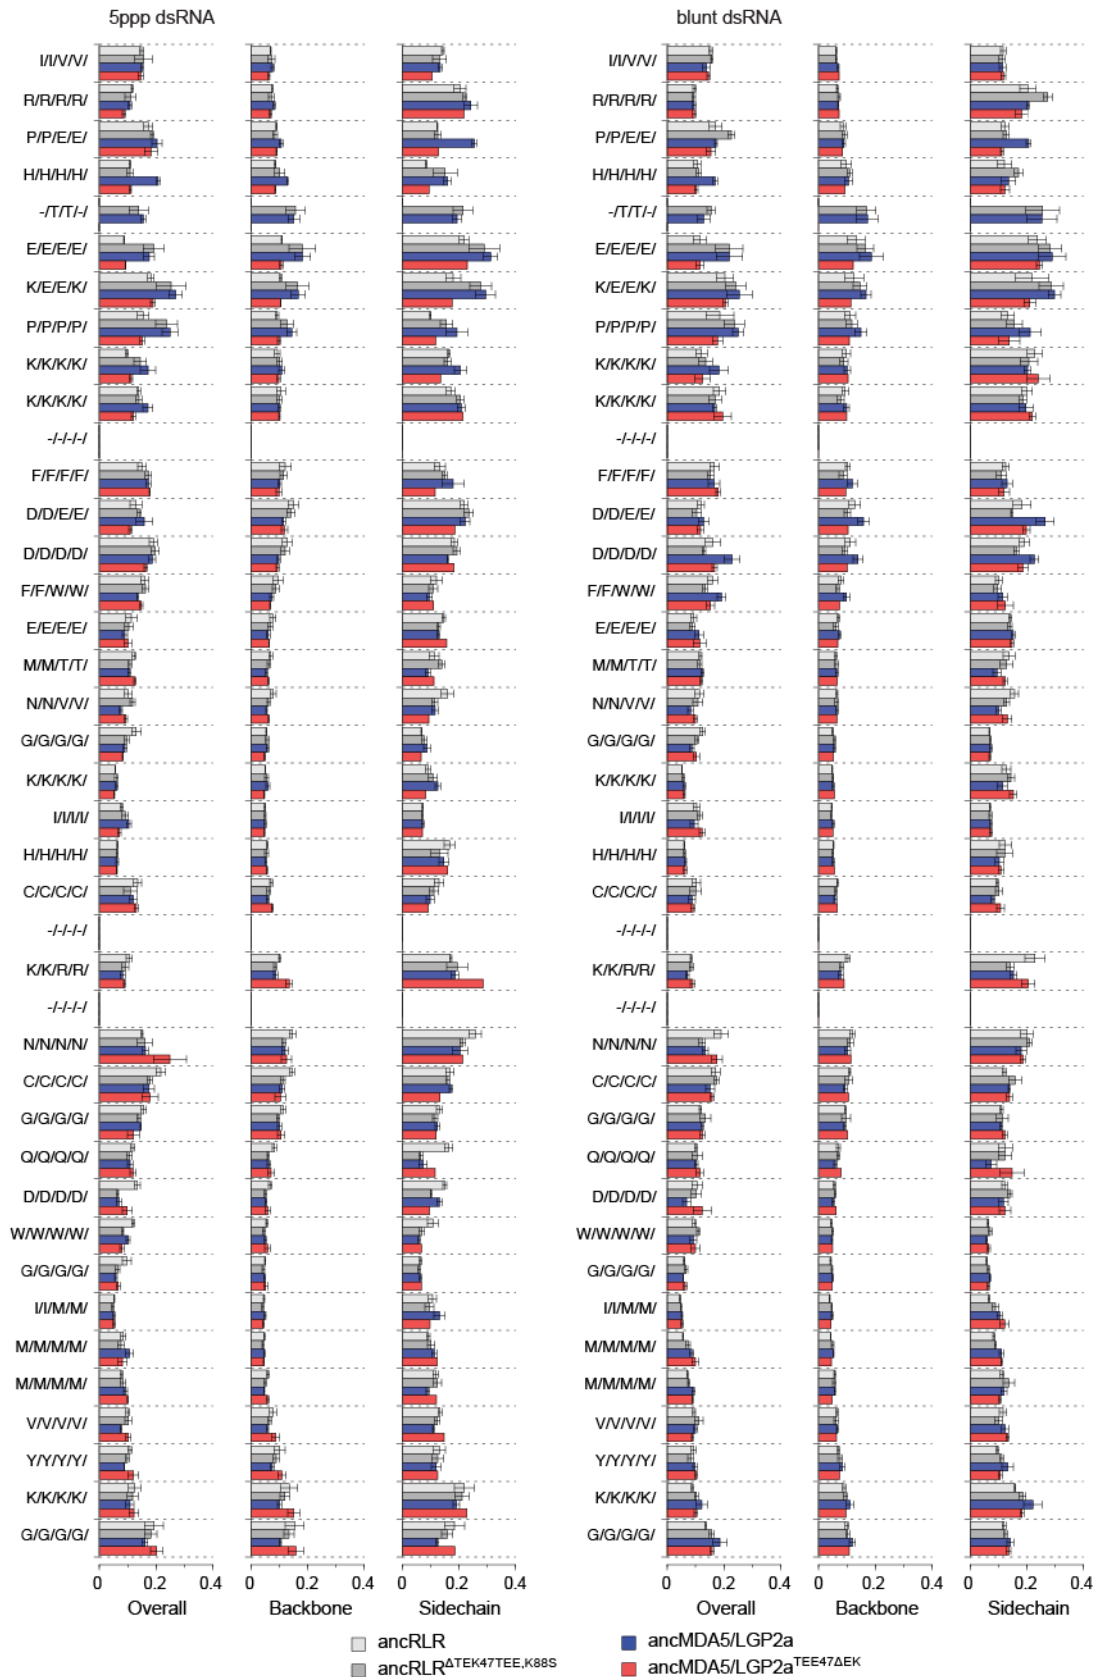

Figure S23, part 2.

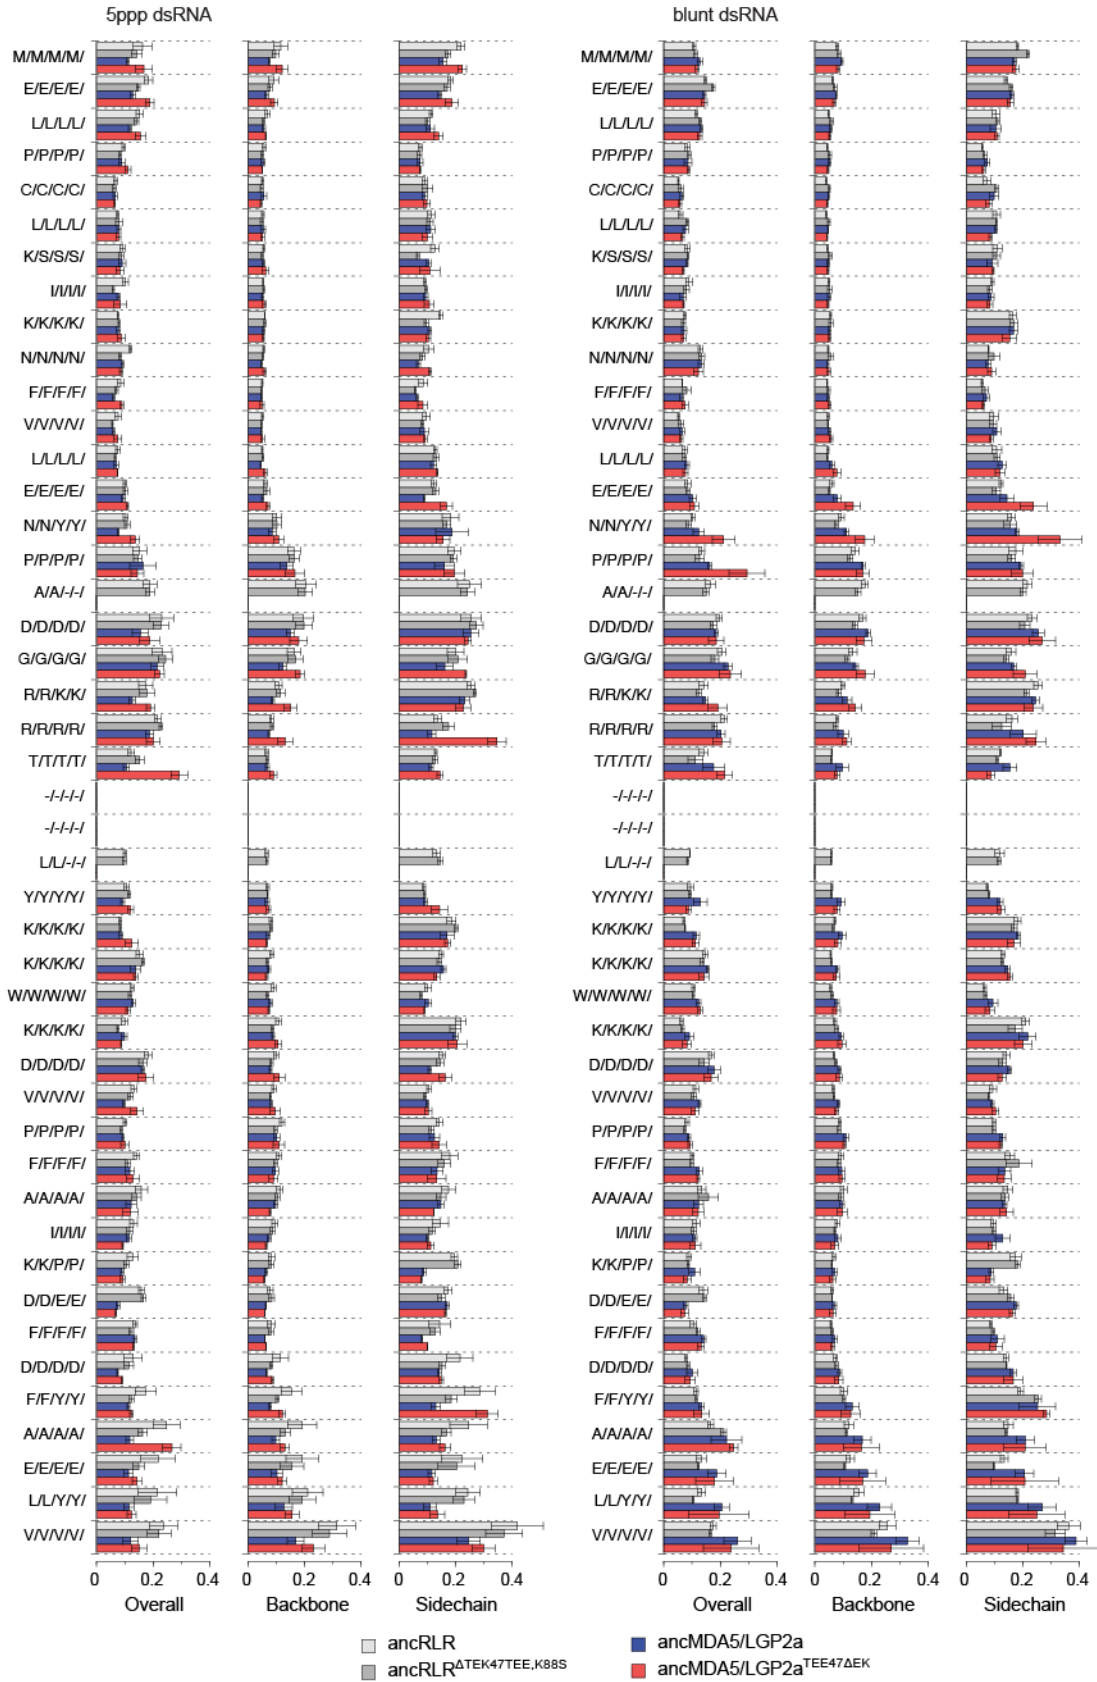

**Figure S23. Root mean squared fluctuation (RMSF) differences between ancRLR and ancMDA5/LGP2a.** We performed replicate molecular dynamics simulations of each RLR RD bound to blunt-ended and 5'ppp dsRNA (see Methods). We plot the overall, backbone and sidechain RMSFs of each residue, averaged over four dynamics simulations. Bars indicate standard errors.

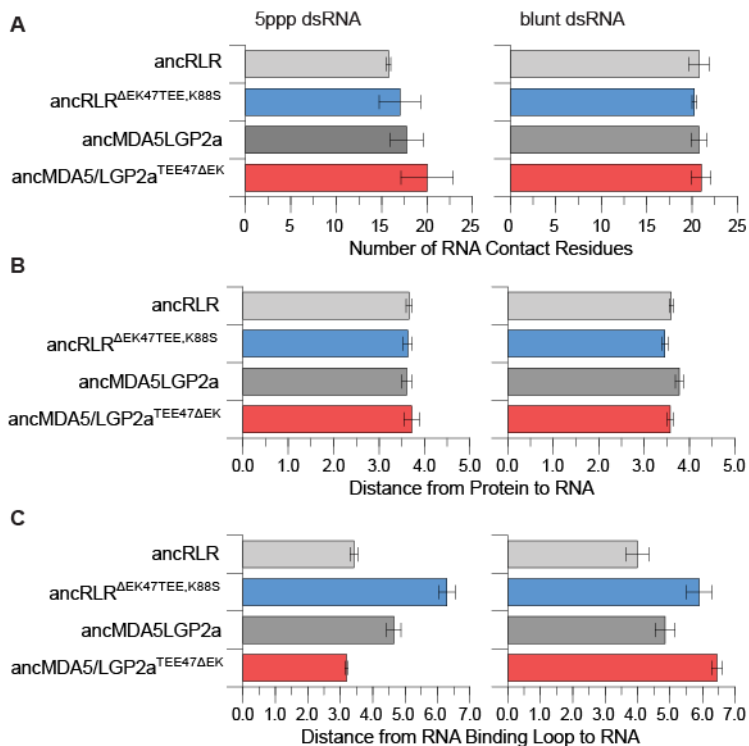

**Figure S24. Reduced distance from the RNA binding loop to the 5'ppp dsRNA ligand correlates with greater affinity for 5'ppp dsRNA in ancRLR and ancMDA5/LGP2a RNA-recognition domains (RDs).** We calculated the distance (in angstroms) between each residue and the RNA molecule over the course of replicate molecular dynamics simulations (see Methods). **A.** We plot the number of potential RNA contact residues, which we defined as residues having an average minimum distance to the RNA < 4 angstroms. **B.** We plot the average distance from each ancestral RD to the RNA molecule across all residues in the RD-RNA interface (average distance to RNA < 8 angstroms). **C.** We plot the average distance between all residues in the canonical RNA-binding loop (see Fig. 2) and the RNA molecule. Bars indicate standard errors over replicate dynamics simulations.

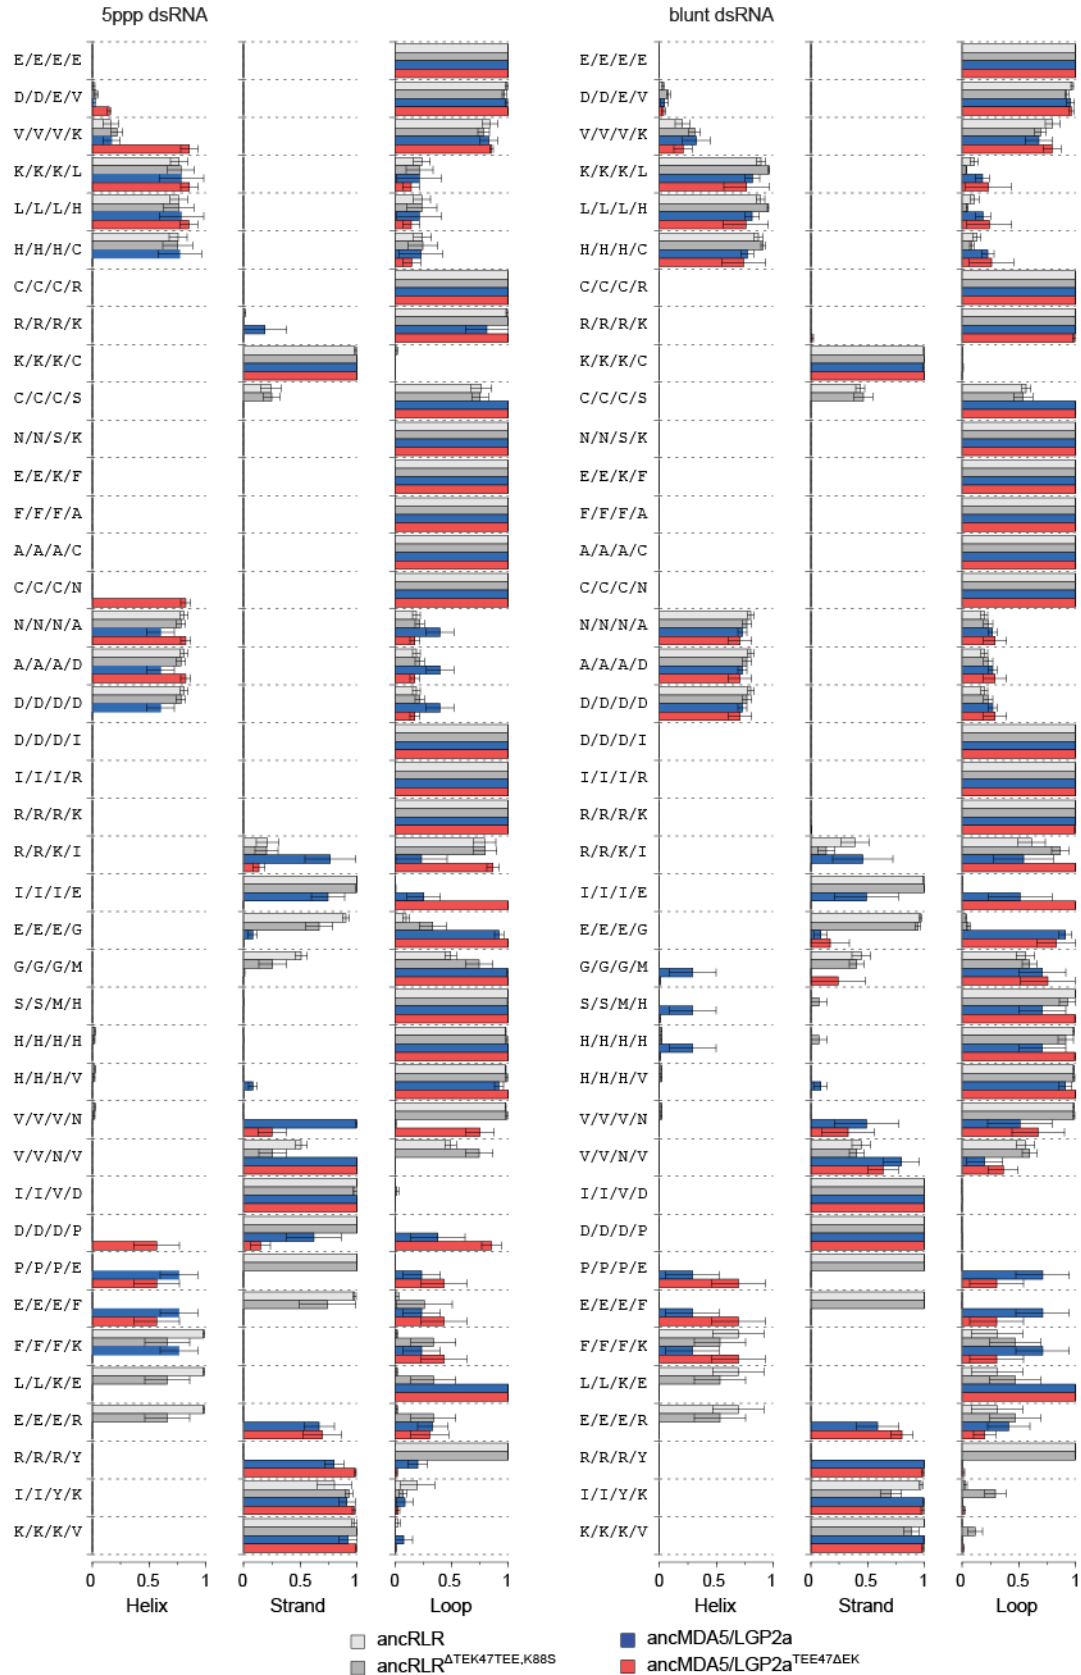

Figure S25, Part 1.



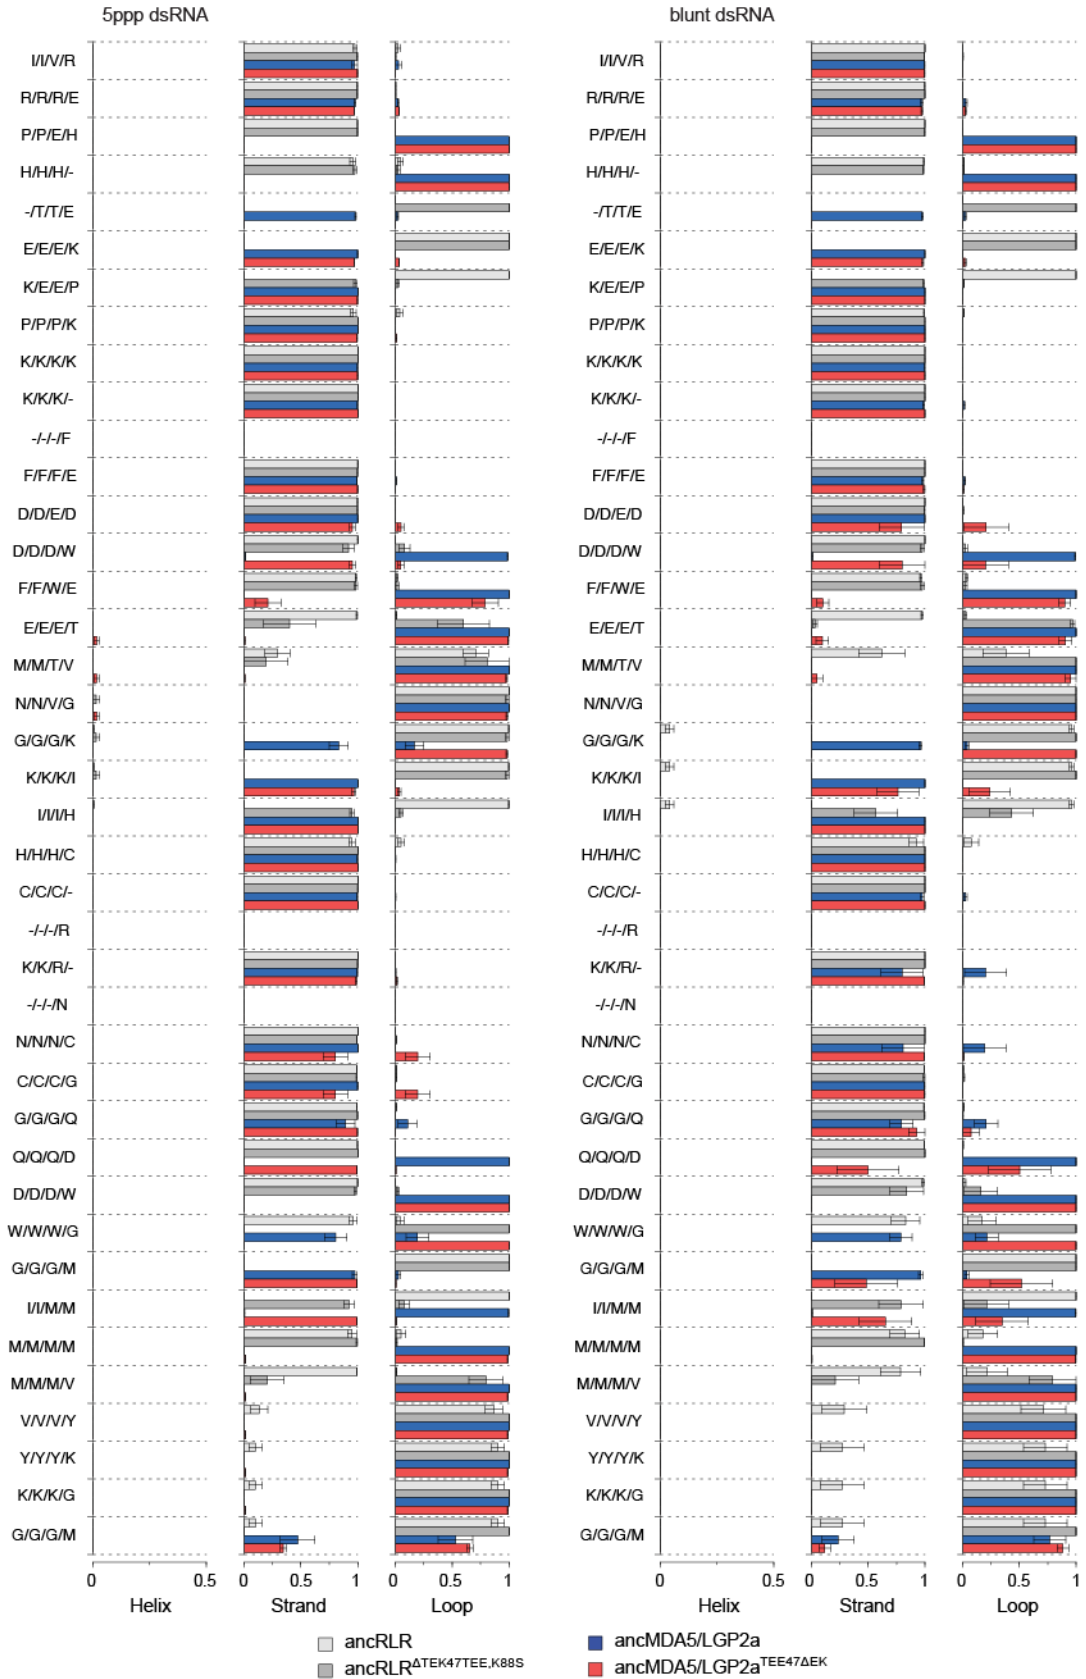

Figure S25, Part 2.

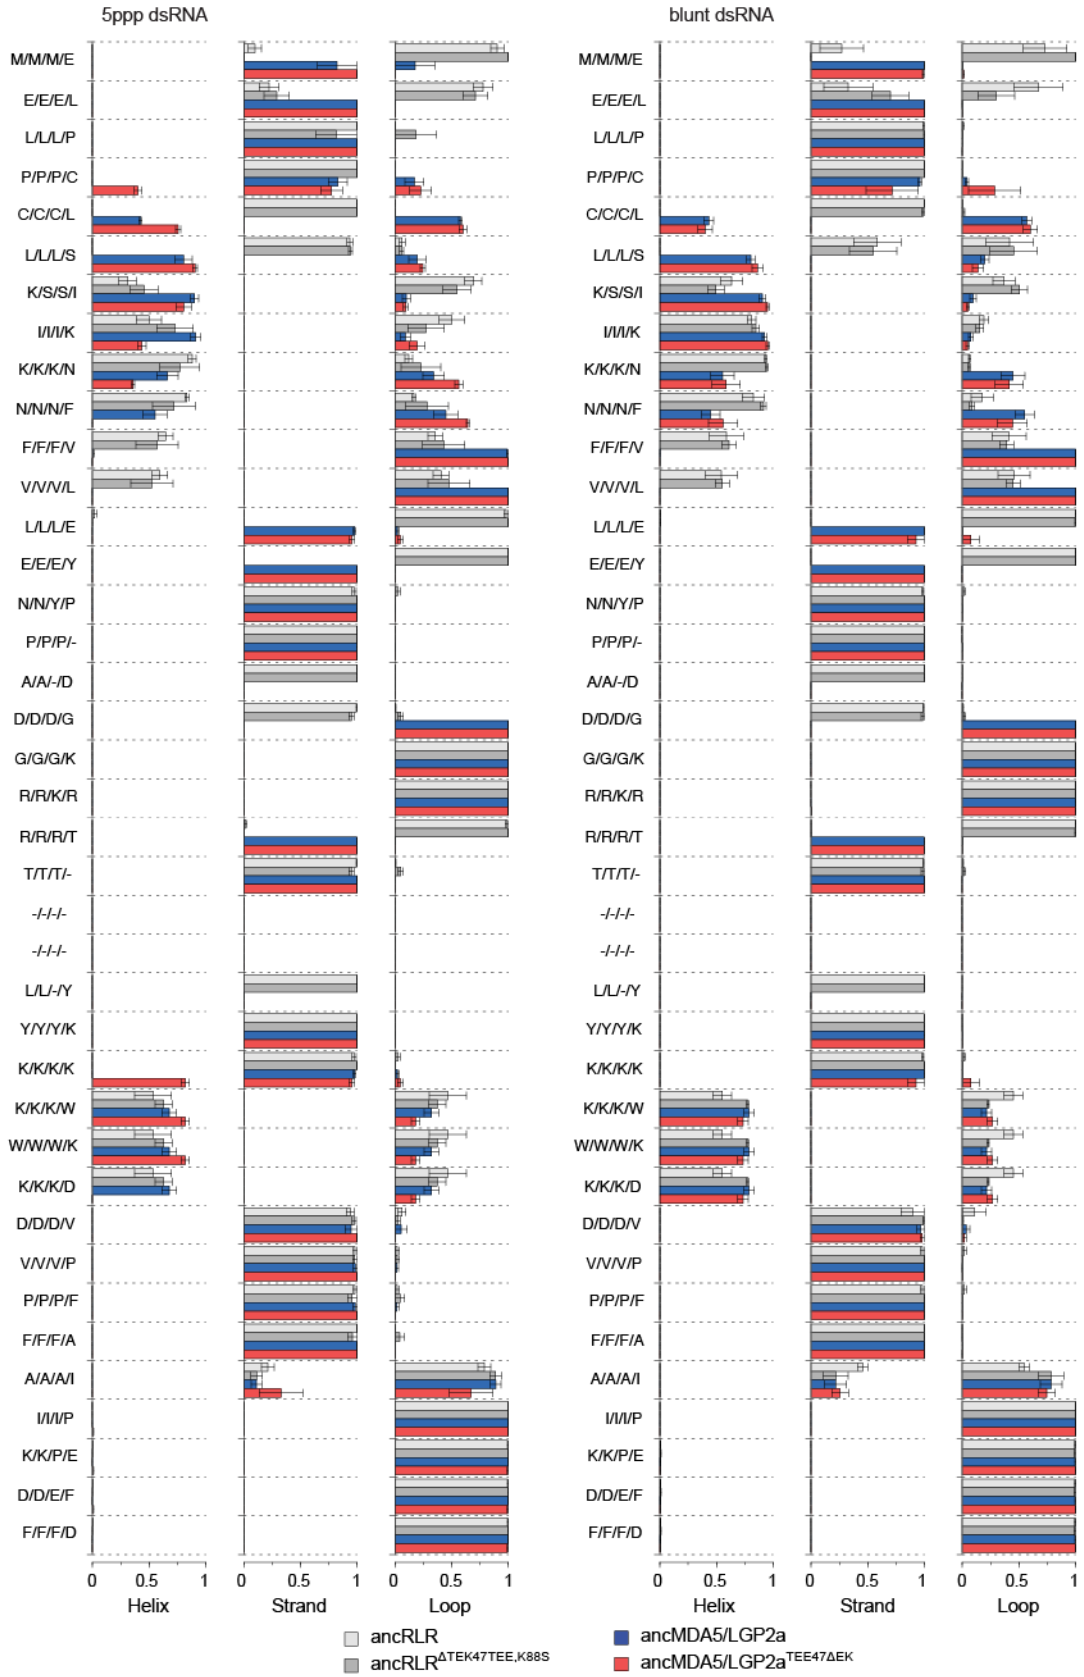

**Figure S25. Protein secondary structure changes between ancRLR ancMDA5/LGP2a.** We calculated protein secondary structure of ancRLR, ancMDA5/LGP2a and mutant RLR RDs across each molecular dynamics simulation (see Methods). For each residue, we plot the average proportion of molecular dynamics time points the residue was inferred as  $\alpha$ -helix,  $\beta$ -strand or unstructured loop. Bars indicate standard errors over replicate dynamics simulations.

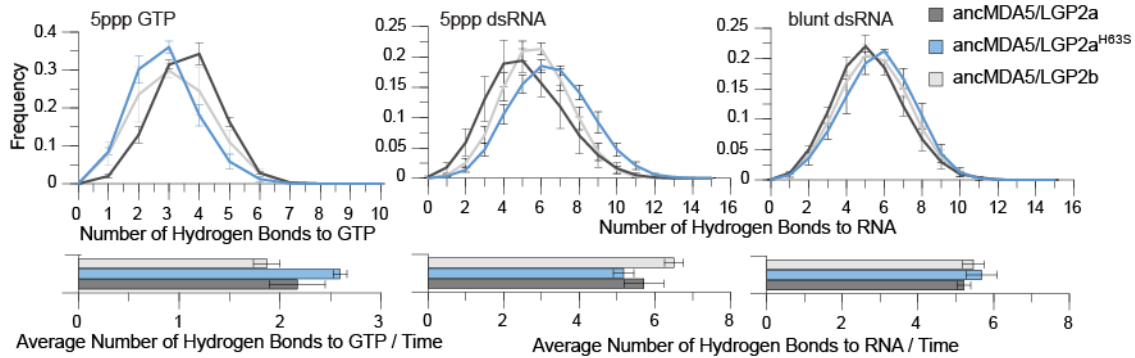

**Figure S26. Hydrogen bonding between ancestral RNA recognition domains (RDs) and RNA ligands changes from ancMDA5/LGP2a to ancMDA5/LGP2b.** We performed replicate molecular dynamics simulations of each ancestral or mutant RLR RD bound to blunt-ended or 5'ppp dsRNA (see Methods). Top panels plot the proportion of simulation samples from which we observed each number of hydrogen bonds between the RD and its RNA ligand, with bars indicating standard errors. Bottom panels plot the average and standard error of the number of hydrogen bonds between the RD and its RNA ligand over all sampled molecular dynamics time points.

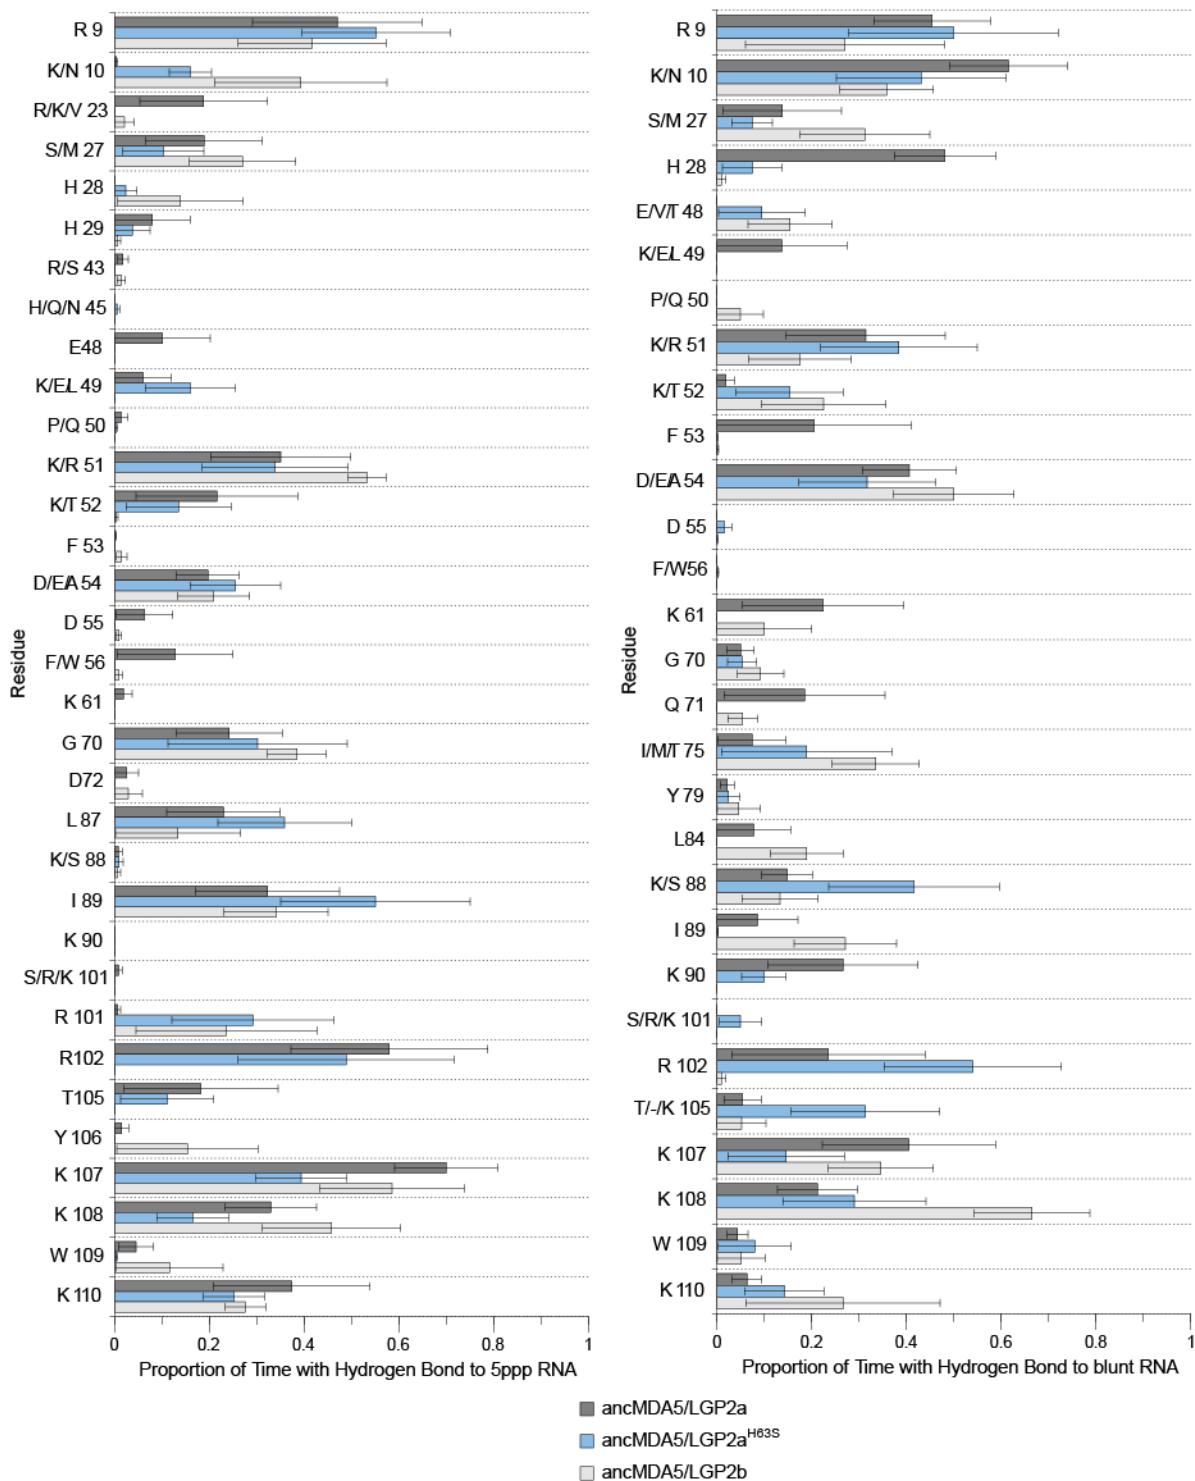

**Figure S27. The capacity of specific residues to form hydrogen bonds to the RNA ligand changes between ancMDA5/LGP2a and ancMDA5/LGP2b.** We performed replicate molecular dynamics simulations of each RLR RD bound to blunt-ended and 5'ppp dsRNA (see Methods). We plot the average proportion of time each residue formed hydrogen bonds with its RNA ligand over the course of molecular dynamics simulations. Bars indicate standard errors over four replicate dynamics simulations.

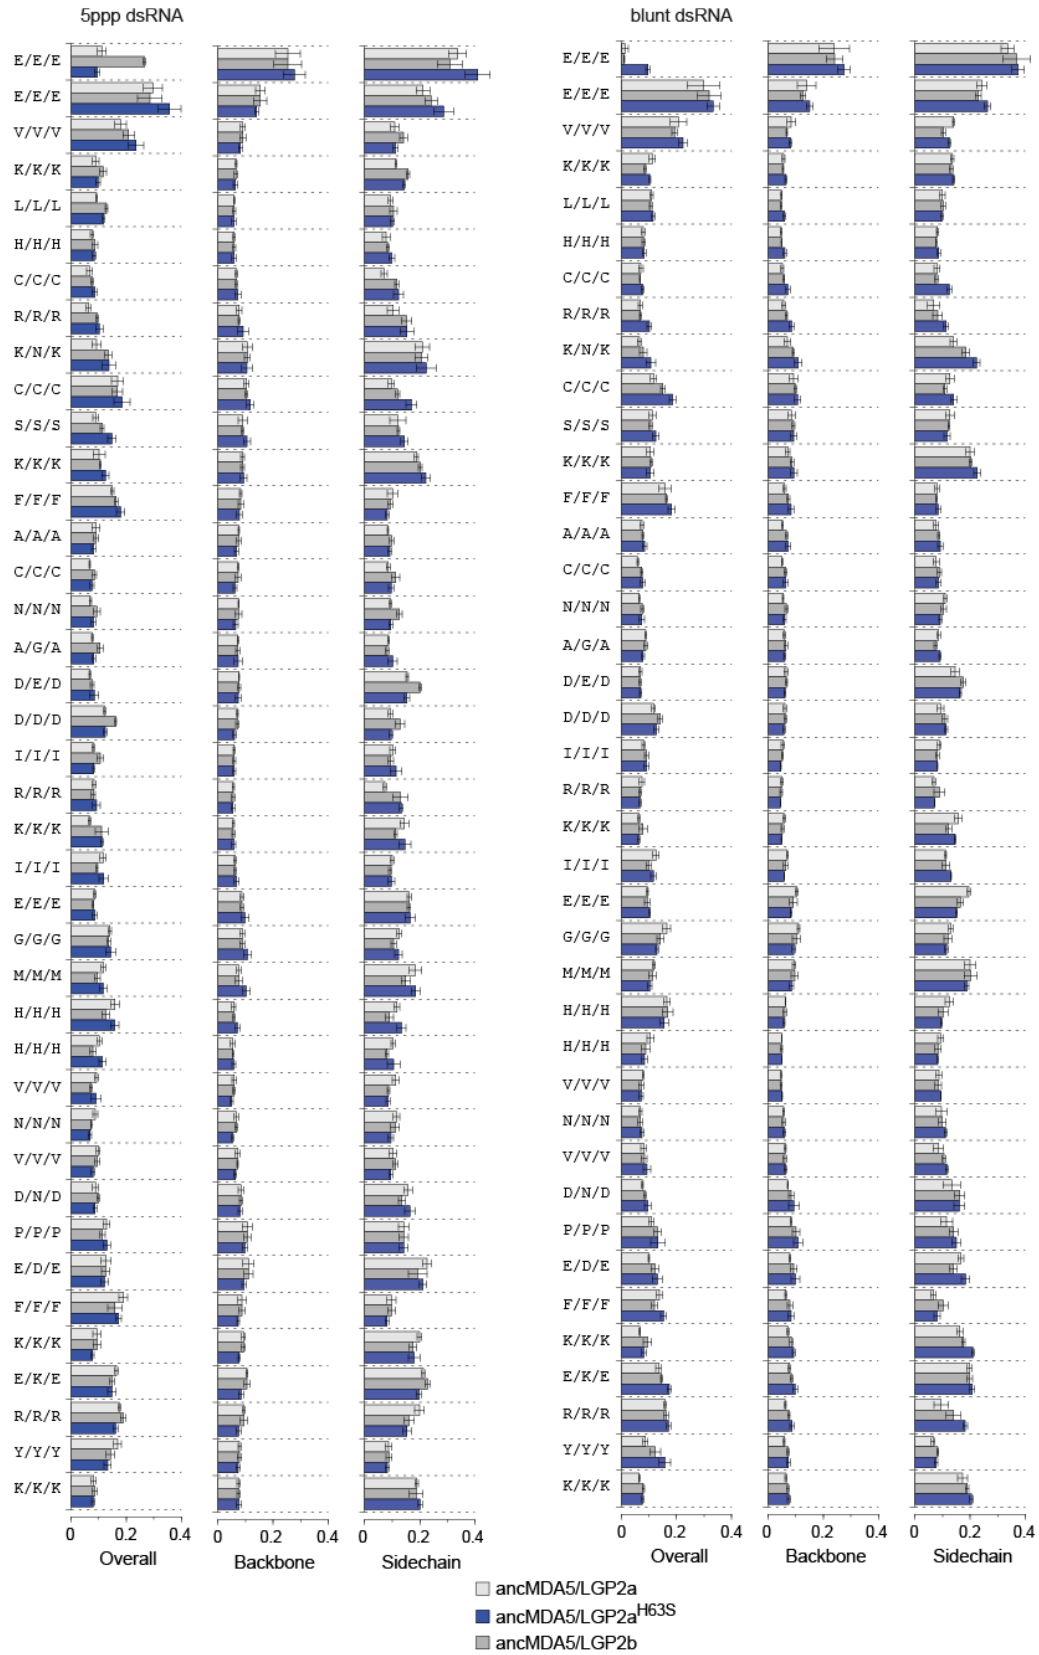

Figure S28, Part 1.

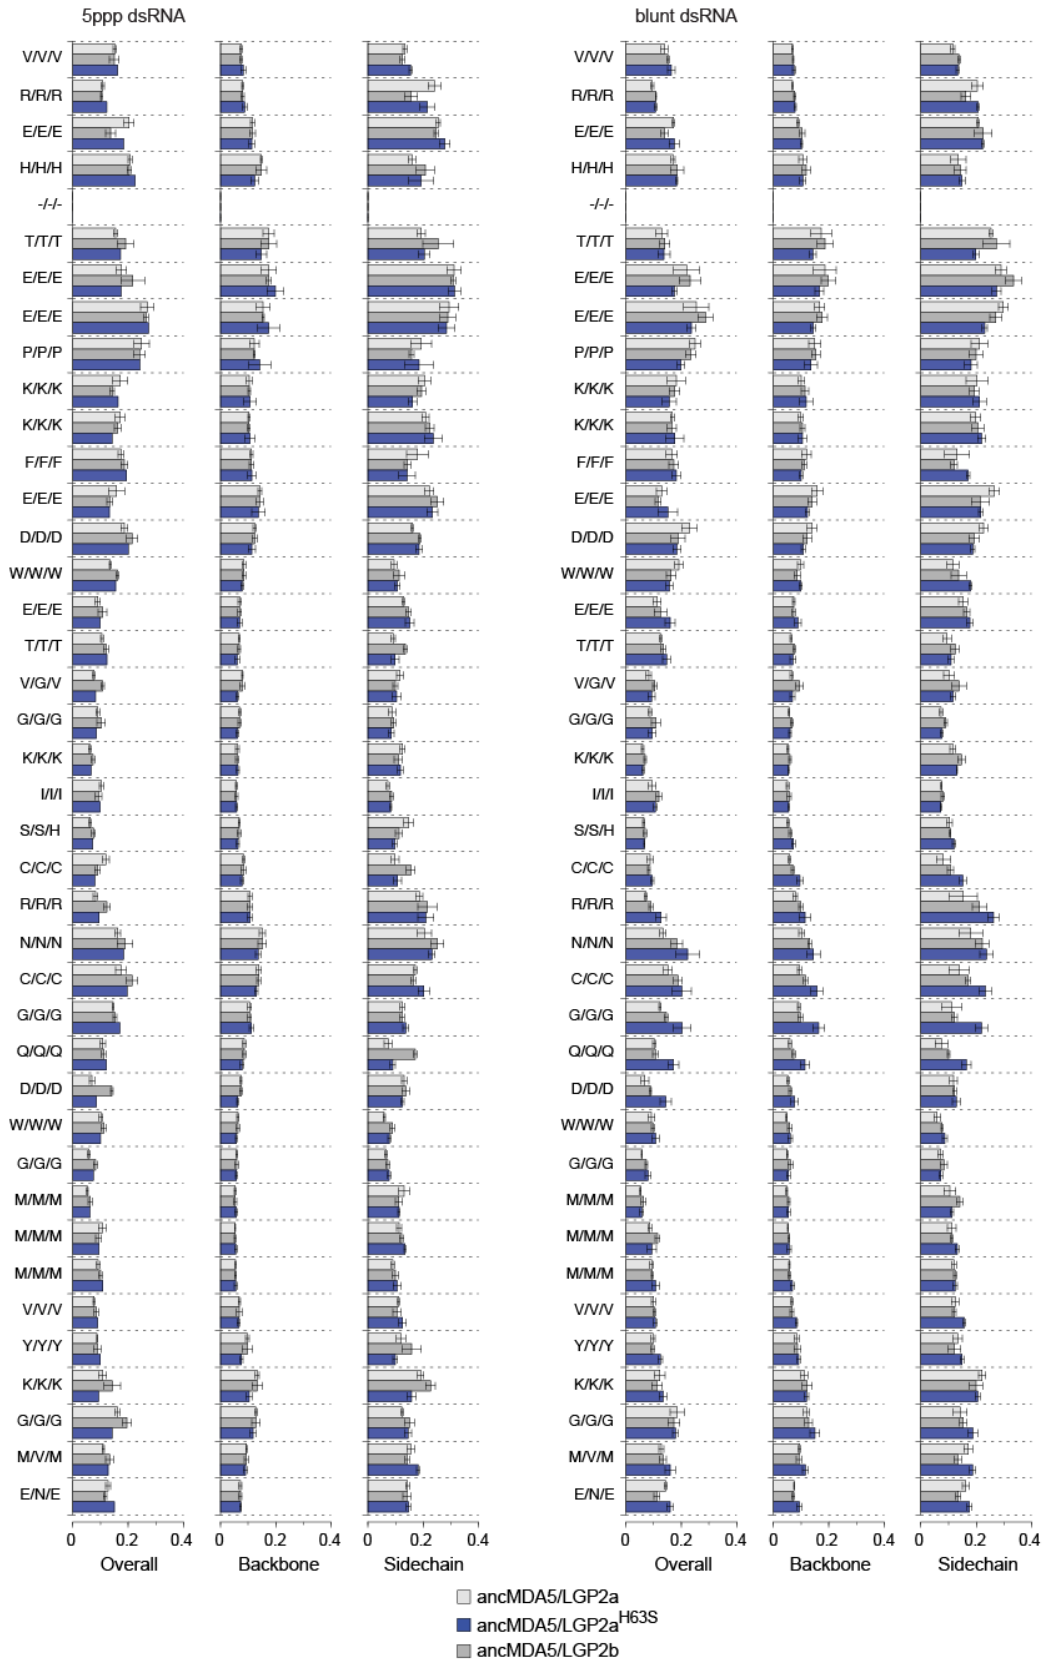

Figure S28, Part 2.





**Figure S28. Root mean squared fluctuation (RMSF) differences between ancMDA5/LGP2a and ancMDA5/LGP2b.** We performed replicate molecular dynamics simulations of each RLR RD bound to blunt-ended and 5'ppp dsRNA (see Methods). We plot the overall, backbone and sidechain RMSFs of each residue, averaged over four dynamics simulations. Bars indicate standard errors.

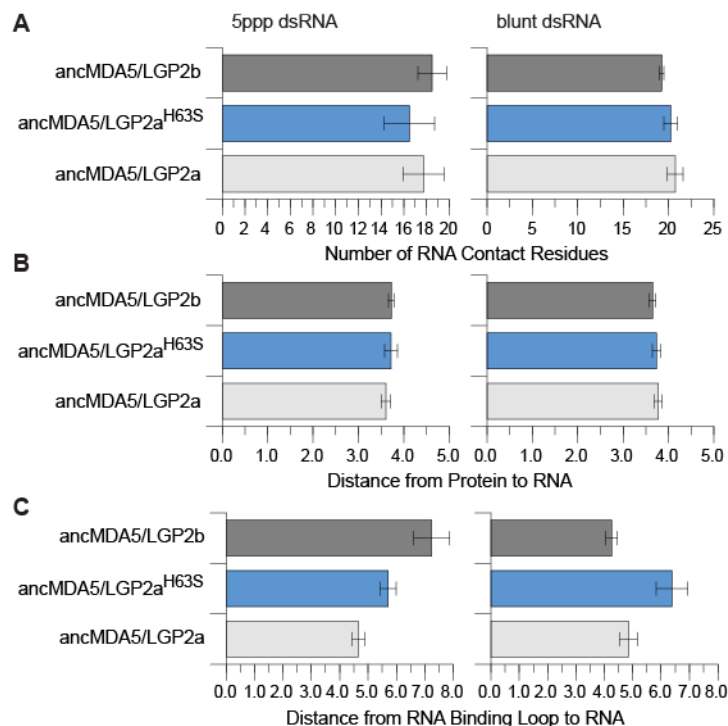

**Figure S29. Reduced distance between the RD and its RNA ligand does not correlate with greater affinity for 5'ppp dsRNA in ancMDA5/LGP2a and ancMDA5/LGP2b RNA-recognition domains (RDs).** We calculated the distance (in angstroms) between each residue and the RNA molecule over the course of replicate molecular dynamics simulations (see Methods). **A.** We plot the number of potential RNA contact residues, which we defined as residues having an average minimum distance to the RNA < 4 angstroms. **B.** We plot the average distance from each ancestral RD to the RNA molecule across all residues in the RD-RNA interface (average distance to RNA < 8 angstroms). **C.** We plot the average distance between all residues in the canonical RNA-binding loop (see Fig. 2) and the RNA molecule. Bars indicate standard errors over replicate dynamics simulations.

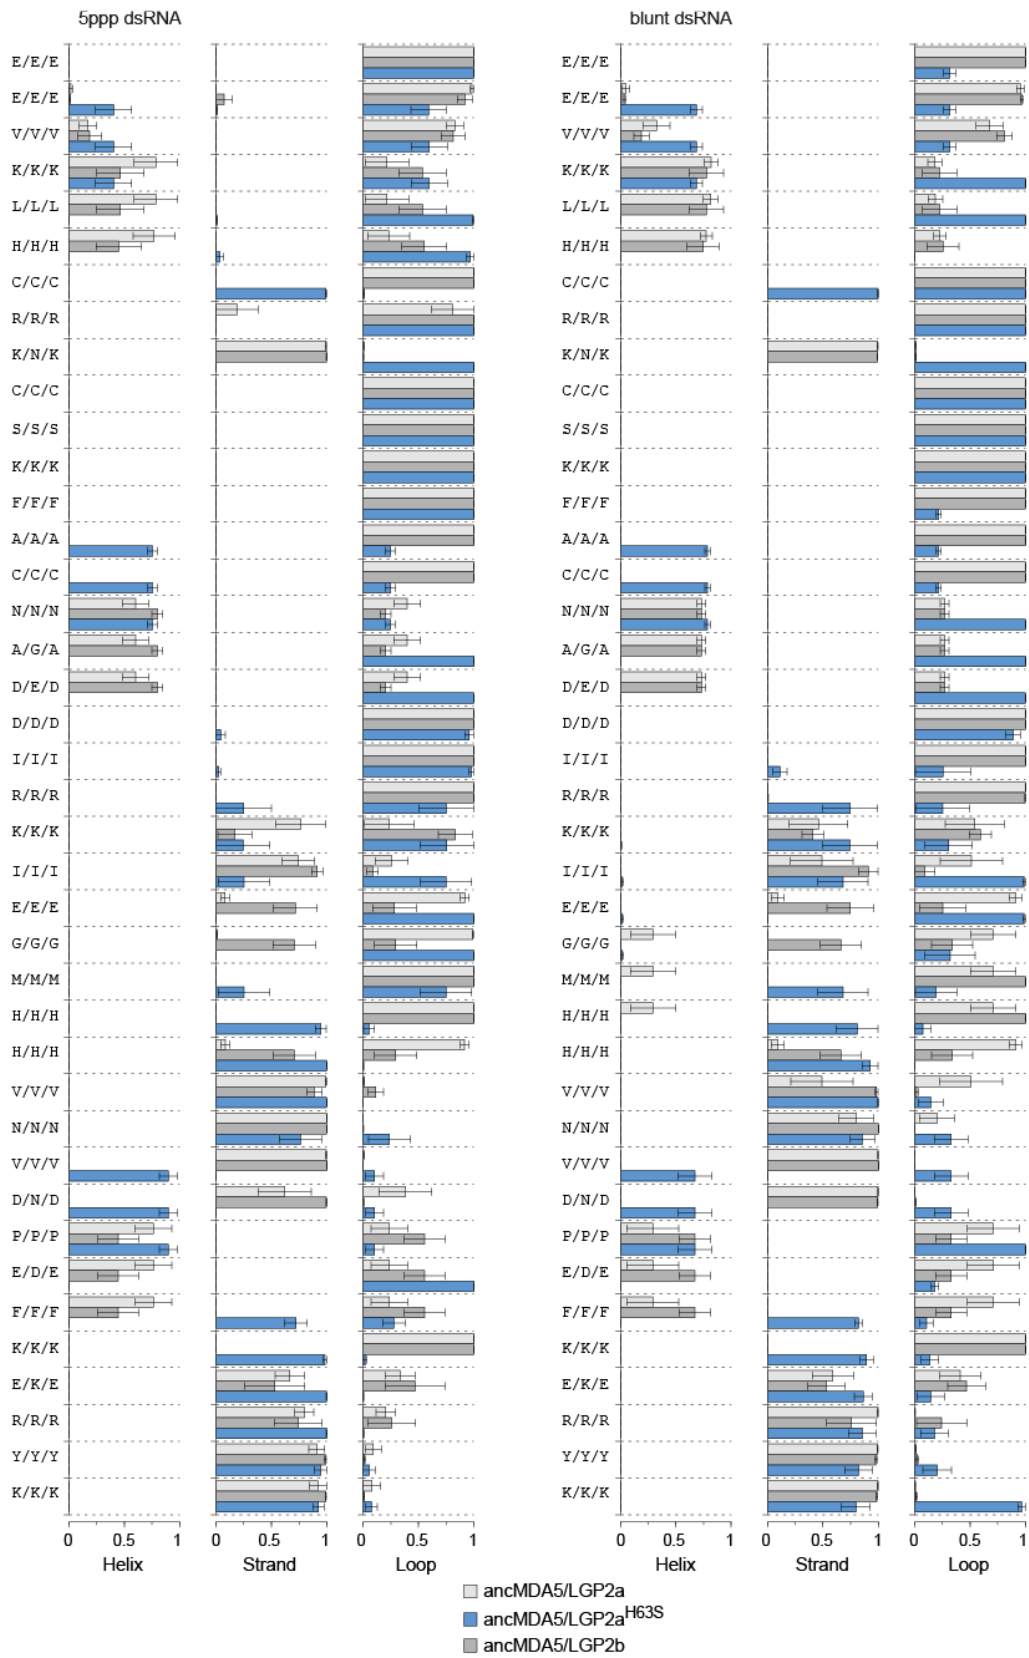

Figure S30, part 1.

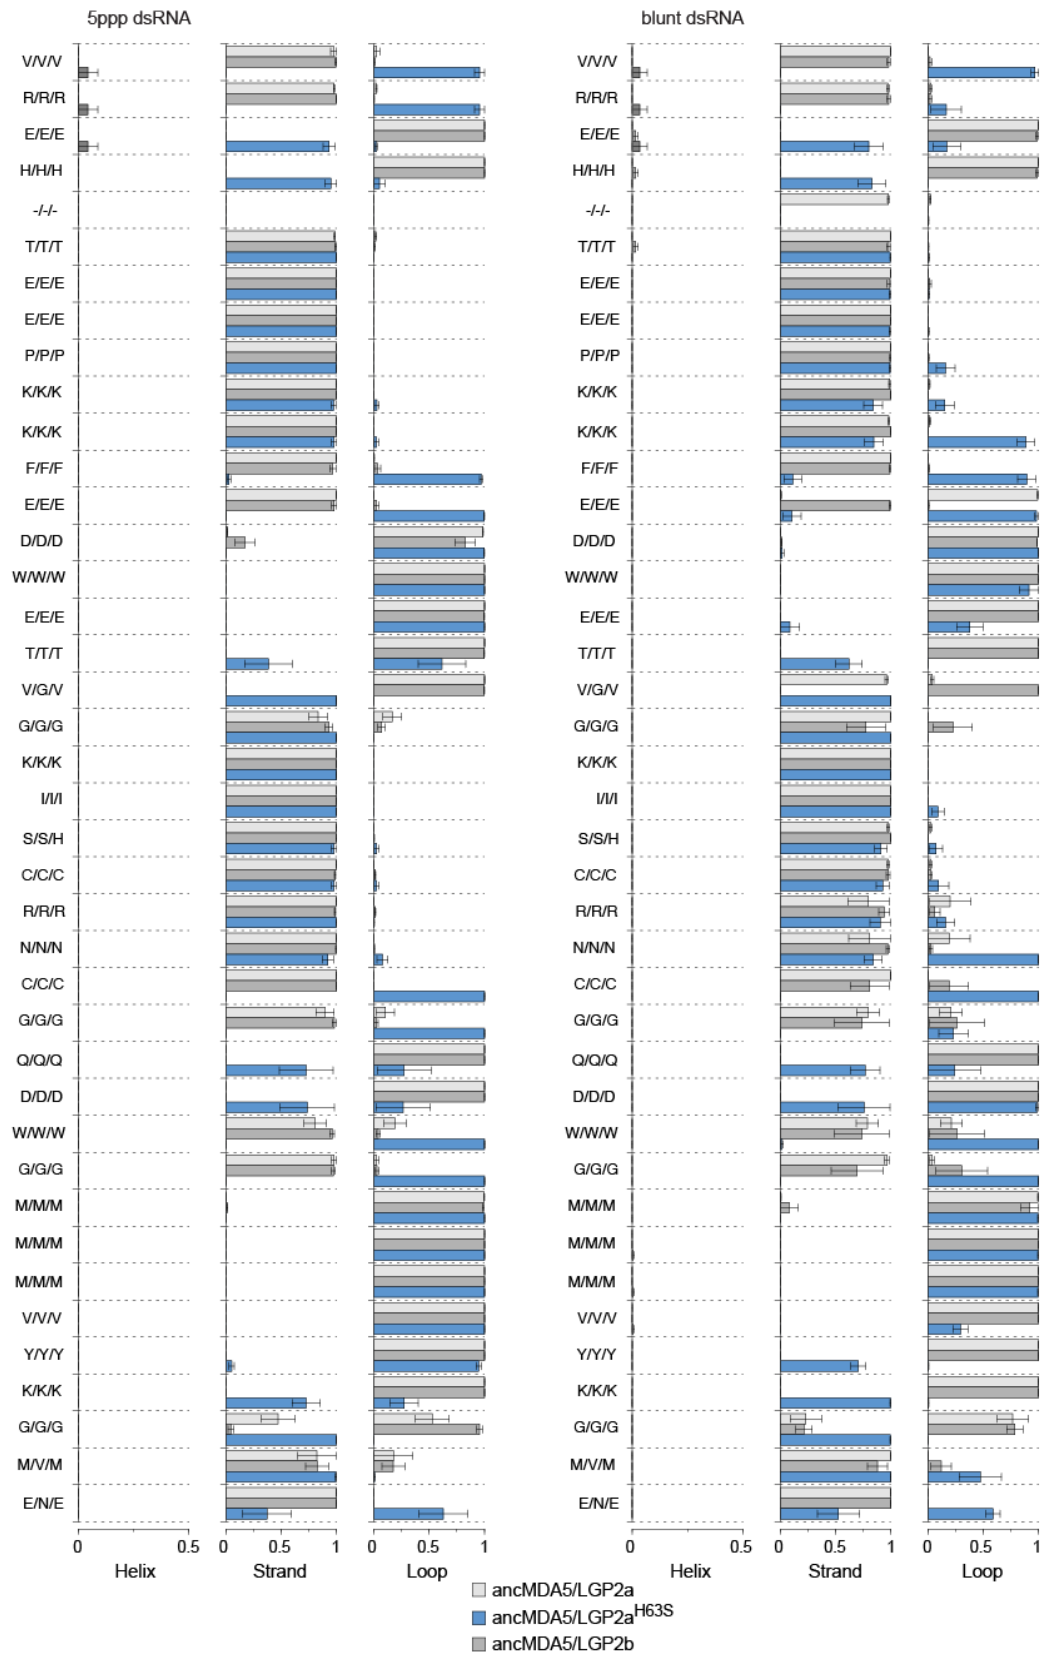

Figure S30, part 2.

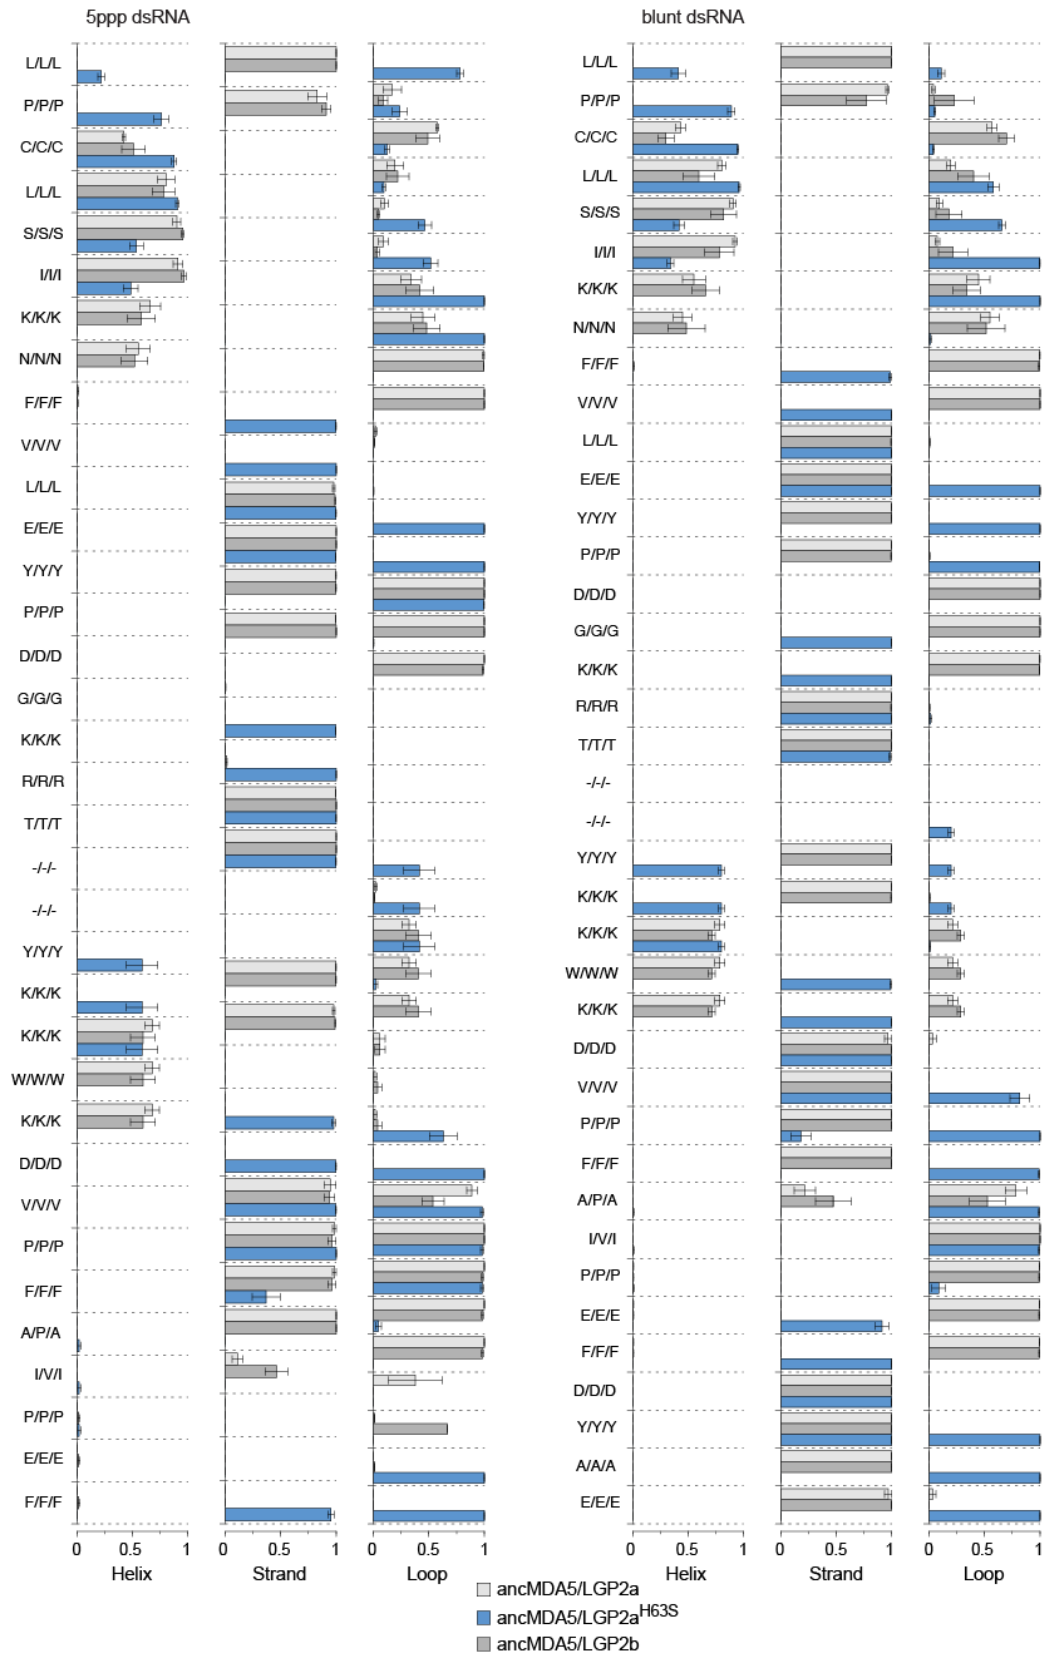

**Figure S30. Protein secondary structure changes between ancMDA5/LGP2a and ancMDA5/LGP2b.** We calculated protein secondary structure of ancRLR, ancMDA5/LGP2a and mutant RLR RDs across each molecular dynamics simulation (see Methods). For each residue, we plot the average proportion of molecular dynamics time points the residue was inferred as  $\alpha$ -helix,  $\beta$ -strand or unstructured loop. Bars indicate standard errors over replicate dynamics simulations.

### Supplementary Tables

|           |                                 |           |                                        |
|-----------|---------------------------------|-----------|----------------------------------------|
| 109115463 | <i>Macaca mulatta</i>           | 308469221 | <i>Caenorhabditis remanei</i>          |
| 111154107 | <i>Macaca mulatta</i>           | 308469293 | <i>Caenorhabditis remanei</i>          |
| 114052719 | <i>Macaca mulatta</i>           | 312069940 | <i>Loa loa</i>                         |
| 114624048 | <i>Pan troglodytes</i>          | 312079013 | <i>Loa loa</i>                         |
| 114624054 | <i>Pan troglodytes</i>          | 312284067 | <i>Sus scrofa</i>                      |
| 114667313 | <i>Pan troglodytes</i>          | 326922819 | <i>Meleagris gallopavo</i>             |
| 148231712 | <i>Xenopus laevis</i>           | 327272183 | <i>Anolis carolinensis</i>             |
| 149408122 | <i>Homo sapiens</i>             | 327283103 | <i>Anolis carolinensis</i>             |
| 149408137 | <i>Rattus norvegicus</i>        | 332234337 | <i>Nomascus leucogenys</i>             |
| 149730873 | <i>Equus caballus</i>           | 332814684 | <i>Pan troglodytes</i>                 |
| 153945886 | <i>Mus musculus</i>             | 339247851 | <i>Trichinella spiralis</i>            |
| 154147577 | <i>Sus scrofa</i>               | 339259444 | <i>Trichinella spiralis</i>            |
| 156393350 | <i>Nematostella vectensis</i>   | 340369687 | <i>Amphimedon queenslandica</i>        |
| 156393452 | <i>Nematostella vectensis</i>   | 344268047 | <i>Loxodonta africana</i>              |
| 156401322 | <i>Nematostella vectensis</i>   | 344271077 | <i>Loxodonta africana</i>              |
| 157822253 | <i>Rattus norvegicus</i>        | 345308281 | <i>Ornithorhynchus anatinus</i>        |
| 170593727 | <i>Brugia malayi</i>            | 348562460 | <i>Cavia porcellus</i>                 |
| 17539846  | <i>Caenorhabditis elegans</i>   | 348569861 | <i>Cavia porcellus</i>                 |
| 194224905 | <i>Equus caballus</i>           | 348585927 | <i>Cavia porcellus</i>                 |
| 197098648 | <i>Pongo abelii</i>             | 354485032 | <i>Cricetulus griseus</i>              |
| 198430581 | <i>Ciona intestinalis</i>       | 354493094 | <i>Cricetulus griseus</i>              |
| 213513760 | <i>Salmo salar</i>              | 356460981 | <i>Sus scrofa</i>                      |
| 254911056 | <i>Salmo salar</i>              | 359320815 | <i>Canis lupus familiaris</i>          |
| 257096036 | <i>Mus musculus</i>             | 363743602 | <i>Gallus gallus</i>                   |
| 257096038 | <i>Mus musculus</i>             | 380422390 | <i>Danio rerio</i>                     |
| 260809266 | <i>Branchiostoma floridae</i>   | 390331517 | <i>Strongylocentrotus purpuratus</i>   |
| 260809268 | <i>Branchiostoma floridae</i>   | 390331519 | <i>Strongylocentrotus purpuratus</i>   |
| 260809270 | <i>Branchiostoma floridae</i>   | 390331521 | <i>Strongylocentrotus purpuratus</i>   |
| 260817577 | <i>Branchiostoma floridae</i>   | 390331523 | <i>Strongylocentrotus purpuratus</i>   |
| 268536792 | <i>Caenorhabditis briggsae</i>  | 390336956 | <i>Strongylocentrotus purpuratus</i>   |
| 268536796 | <i>Caenorhabditis briggsae</i>  | 390341546 | <i>Strongylocentrotus purpuratus</i>   |
| 268567267 | <i>Caenorhabditis briggsae</i>  | 390342381 | <i>Strongylocentrotus purpuratus</i>   |
| 27881482  | <i>Homo sapiens</i>             | 390347586 | <i>Strongylocentrotus purpuratus</i>   |
| 27886568  | <i>Homo sapiens</i>             | 390354545 | <i>Strongylocentrotus purpuratus</i>   |
| 291235953 | <i>Saccoglossus kowalevskii</i> | 390463706 | <i>Callithrix jacchus</i>              |
| 291383111 | <i>Oryctolagus cuniculus</i>    | 395519645 | <i>Sarcophilus harrisii</i>            |
| 291391627 | <i>Oryctolagus cuniculus</i>    | 395532380 | <i>Sarcophilus harrisii</i>            |
| 291406113 | <i>Oryctolagus cuniculus</i>    | 395826380 | <i>Otolemur garnettii</i>              |
| 296190081 | <i>Callithrix jacchus</i>       | 395826382 | <i>Otolemur garnettii</i>              |
| 296202916 | <i>Callithrix jacchus</i>       | 395826384 | <i>Otolemur garnettii</i>              |
| 296202918 | <i>Callithrix jacchus</i>       | 395844909 | <i>Otolemur garnettii</i>              |
| 296204692 | <i>Callithrix jacchus</i>       | 395855808 | <i>Otolemur garnettii</i>              |
| 297273051 | <i>Macaca mulatta</i>           | 395855810 | <i>Otolemur garnettii</i>              |
| 297471684 | <i>Bos taurus</i>               | 397485570 | <i>Pan paniscus</i>                    |
| 297668722 | <i>Pongo abelii</i>             | 397485572 | <i>Pan paniscus</i>                    |
| 297684253 | <i>Pongo abelii</i>             | 397500570 | <i>Pan paniscus</i>                    |
| 301773535 | <i>Ailuropoda melanoleuca</i>   | 397520025 | <i>Pan paniscus</i>                    |
| 301778989 | <i>Ailuropoda melanoleuca</i>   | 397520027 | <i>Pan paniscus</i>                    |
| 301785794 | <i>Ailuropoda melanoleuca</i>   | 402888490 | <i>Papio anubis</i>                    |
| 302370918 | <i>Gallus gallus</i>            | 402897212 | <i>Papio anubis</i>                    |
| 304434770 | <i>Oncorhynchus mykiss</i>      | 402900290 | <i>Papio anubis</i>                    |
| 308455471 | <i>Caenorhabditis remanei</i>   | 403258897 | <i>Saimiri boliviensis boliviensis</i> |
| 308466625 | <i>Caenorhabditis remanei</i>   | 403297888 | <i>Saimiri boliviensis boliviensis</i> |



403304470 *Saimiri boliviensis boliviensis*  
403304472 *Saimiri boliviensis boliviensis*  
410897044 *Takifugu rubripes*  
410902733 *Takifugu rubripes*  
426221009 *Ovis aries*  
426222380 *Ovis aries*  
426238043 *Ovis aries*  
426337537 *Gorilla gorilla gorilla*  
426348251 *Gorilla gorilla gorilla*  
426361539 *Gorilla gorilla gorilla*  
432867922 *Oryzias latipes*  
432934592 *Oryzias latipes*  
441677777 *Nomascus leucogenys*  
449491219 *Taeniopygia guttata*  
449507056 *Taeniopygia guttata*  
449514052 *Taeniopygia guttata*  
459185383 *Ciona intestinalis*  
466035138 *Orcinus orca*  
466073108 *Orcinus orca*  
466077086 *Orcinus orca*  
470628436 *Tursiops truncatus*  
470640590 *Tursiops truncatus*  
471369945 *Trichechus manatus latirostris*  
471417714 *Trichechus manatus latirostris*  
471417716 *Trichechus manatus latirostris*  
471418994 *Trichechus manatus latirostris*  
472344976 *Odobenus rosmarus divergens*  
472381721 *Odobenus rosmarus divergens*  
472382387 *Odobenus rosmarus divergens*  
478508066 *Ceratotherium simum simum*  
478508301 *Ceratotherium simum simum*  
478508303 *Ceratotherium simum simum*  
478520621 *Ceratotherium simum simum*  
488545868 *Dasybus novemcinctus*  
488545870 *Dasybus novemcinctus*  
488545872 *Dasybus novemcinctus*  
488565638 *Dasybus novemcinctus*  
488565640 *Dasybus novemcinctus*  
488594425 *Dasybus novemcinctus*  
498991746 *Maylandia zebra*  
499012355 *Maylandia zebra*  
499013353 *Maylandia zebra*  
504127371 *Ochotona princeps*  
504137312 *Ochotona princeps*  
504181289 *Ochotona princeps*  
505768383 *Sorex araneus*  
505800717 *Sorex araneus*  
505803065 *Sorex araneus*  
507535823 *Jaculus jaculus*  
507535825 *Jaculus jaculus*  
507542883 *Jaculus jaculus*  
507549246 *Jaculus jaculus*  
507639468 *Octodon degus*  
507648173 *Octodon degus*  
507650869 *Echinops telfairi*  
507655253 *Octodon degus*  
507665028 *Echinops telfairi*  
507688690 *Echinops telfairi*  
507926800 *Condylura cristata*  
507952430 *Condylura cristata*  
507954670 *Condylura cristata*  
511838976 *Mustela putorius furo*  
511891446 *Mustela putorius furo*  
511891448 *Mustela putorius furo*  
511891450 *Mustela putorius furo*  
511891452 *Mustela putorius furo*  
511891454 *Mustela putorius furo*  
511906606 *Mustela putorius furo*  
511906608 *Mustela putorius furo*  
511945175 *Mustela putorius furo*  
511971782 *Mustela putorius furo*  
511971784 *Mustela putorius furo*  
511971786 *Mustela putorius furo*  
511971788 *Mustela putorius furo*  
511971790 *Mustela putorius furo*  
512015167 *Mustela putorius furo*  
512015169 *Mustela putorius furo*  
512808626 *Heterocephalus glaber*  
512808628 *Heterocephalus glaber*  
512808630 *Heterocephalus glaber*  
512813647 *Xenopus (Silurana) tropicalis*  
512840572 *Heterocephalus glaber*  
512865974 *Xenopus (Silurana) tropicalis*  
512874269 *Xenopus (Silurana) tropicalis*  
512874273 *Xenopus (Silurana) tropicalis*  
512874277 *Xenopus (Silurana) tropicalis*  
512924800 *Heterocephalus glaber*  
512946853 *Heterocephalus glaber*  
512946855 *Heterocephalus glaber*  
512946857 *Heterocephalus glaber*  
512952063 *Heterocephalus glaber*  
512995649 *Heterocephalus glaber*  
513226256 *Gallus gallus*  
513226259 *Gallus gallus*  
513226262 *Gallus gallus*  
514455710 *Cavia porcellus*  
514750528 *Anas platyrhynchos*  
514776939 *Anas platyrhynchos*  
514796163 *Anas platyrhynchos*  
523704380 *Ictalurus punctatus*  
523704386 *Ictalurus punctatus*  
523704392 *Ictalurus punctatus*  
524866761 *Aplysia californica*  
524866763 *Aplysia californica*  
524892613 *Aplysia californica*  
524895767 *Aplysia californica*  
524958007 *Mesocricetus auratus*  
524975237 *Mesocricetus auratus*  
525003555 *Ficedula albicollis*  
525024579 *Ficedula albicollis*  
525027443 *Ficedula albicollis*  
527246408 *Melopsittacus undulatus*  
527247366 *Melopsittacus undulatus*  
527269403 *Melopsittacus undulatus*  
528491003 *Danio rerio*  
528908090 *Bos taurus*  
528908092 *Bos taurus*  
528958082 *Bos taurus*  
528958084 *Bos taurus*  
529425898 *Falco peregrinus*  
529429213 *Falco peregrinus*  
529430101 *Falco peregrinus*  
530604799 *Chrysemys picta bellii*  
530604801 *Chrysemys picta bellii*

|           |                                   |           |                                   |
|-----------|-----------------------------------|-----------|-----------------------------------|
| 530604803 | <i>Chrysemys picta bellii</i>     | 554539925 | <i>Myotis brandtii</i>            |
| 530604805 | <i>Chrysemys picta bellii</i>     | 554562932 | <i>Myotis brandtii</i>            |
| 530604807 | <i>Chrysemys picta bellii</i>     | 554562934 | <i>Myotis brandtii</i>            |
| 530606212 | <i>Chrysemys picta bellii</i>     | 554814916 | <i>Haplochromis burtoni</i>       |
| 530606214 | <i>Chrysemys picta bellii</i>     | 554814918 | <i>Haplochromis burtoni</i>       |
| 532005375 | <i>Microtus ochrogaster</i>       | 554819328 | <i>Haplochromis burtoni</i>       |
| 532005377 | <i>Microtus ochrogaster</i>       | 554819330 | <i>Haplochromis burtoni</i>       |
| 532039126 | <i>Microtus ochrogaster</i>       | 554819332 | <i>Haplochromis burtoni</i>       |
| 532052660 | <i>Microtus ochrogaster</i>       | 554819334 | <i>Haplochromis burtoni</i>       |
| 532059804 | <i>Ictidomys tridecemlineatus</i> | 555970659 | <i>Bos mutus</i>                  |
| 532059806 | <i>Ictidomys tridecemlineatus</i> | 555974569 | <i>Bos mutus</i>                  |
| 532059808 | <i>Ictidomys tridecemlineatus</i> | 555994926 | <i>Bos mutus</i>                  |
| 532072212 | <i>Ictidomys tridecemlineatus</i> | 556736769 | <i>Panthalops hodgsonii</i>       |
| 532080950 | <i>Ictidomys tridecemlineatus</i> | 556738700 | <i>Panthalops hodgsonii</i>       |
| 533158924 | <i>Chinchilla lanigera</i>        | 556745786 | <i>Panthalops hodgsonii</i>       |
| 533158926 | <i>Chinchilla lanigera</i>        | 556987117 | <i>Latimeria chalumnae</i>        |
| 533161308 | <i>Chinchilla lanigera</i>        | 557005377 | <i>Latimeria chalumnae</i>        |
| 533161310 | <i>Chinchilla lanigera</i>        | 557018441 | <i>Latimeria chalumnae</i>        |
| 533175819 | <i>Chinchilla lanigera</i>        | 557284378 | <i>Alligator sinensis</i>         |
| 541953364 | <i>Falco cherrug</i>              | 557319289 | <i>Alligator sinensis</i>         |
| 541971298 | <i>Falco cherrug</i>              | 557329201 | <i>Alligator sinensis</i>         |
| 541981722 | <i>Falco cherrug</i>              | 558101469 | <i>Myotis lucifugus</i>           |
| 542152859 | <i>Zonotrichia albicollis</i>     | 558101471 | <i>Myotis lucifugus</i>           |
| 542168361 | <i>Zonotrichia albicollis</i>     | 558124456 | <i>Pelodiscus sinensis</i>        |
| 542174161 | <i>Zonotrichia albicollis</i>     | 558141560 | <i>Myotis lucifugus</i>           |
| 542181785 | <i>Oreochromis niloticus</i>      | 558141564 | <i>Myotis lucifugus</i>           |
| 542181789 | <i>Oreochromis niloticus</i>      | 558162372 | <i>Pelodiscus sinensis</i>        |
| 542228550 | <i>Oreochromis niloticus</i>      | 558162376 | <i>Pelodiscus sinensis</i>        |
| 543245956 | <i>Geospiza fortis</i>            | 558170072 | <i>Myotis lucifugus</i>           |
| 543271683 | <i>Geospiza fortis</i>            | 558198829 | <i>Pelodiscus sinensis</i>        |
| 543291626 | <i>Geospiza fortis</i>            | 560914247 | <i>Camelus ferus</i>              |
| 543348865 | <i>Pseudopodoces humilis</i>      | 560927981 | <i>Camelus ferus</i>              |
| 543373588 | <i>Pseudopodoces humilis</i>      | 560932894 | <i>Camelus ferus</i>              |
| 543376777 | <i>Pseudopodoces humilis</i>      | 560932896 | <i>Camelus ferus</i>              |
| 543714794 | <i>Columba livia</i>              | 560932898 | <i>Camelus ferus</i>              |
| 543739380 | <i>Columba livia</i>              | 560947414 | <i>Vicugna pacos</i>              |
| 543745715 | <i>Columba livia</i>              | 560953594 | <i>Vicugna pacos</i>              |
| 544475442 | <i>Macaca fascicularis</i>        | 560989496 | <i>Vicugna pacos</i>              |
| 544493999 | <i>Macaca fascicularis</i>        | 562854944 | <i>Tupaia chinensis</i>           |
| 544494001 | <i>Macaca fascicularis</i>        | 562864169 | <i>Tupaia chinensis</i>           |
| 544494003 | <i>Macaca fascicularis</i>        | 564242519 | <i>Alligator mississippiensis</i> |
| 544500072 | <i>Macaca fascicularis</i>        | 564251110 | <i>Alligator mississippiensis</i> |
| 544500074 | <i>Macaca fascicularis</i>        | 564253027 | <i>Alligator mississippiensis</i> |
| 544500076 | <i>Macaca fascicularis</i>        | 564341167 | <i>Rattus norvegicus</i>          |
| 545180520 | <i>Equus caballus</i>             | 564374222 | <i>Rattus norvegicus</i>          |
| 545201667 | <i>Equus caballus</i>             | 564374224 | <i>Rattus norvegicus</i>          |
| 545510597 | <i>Canis lupus familiaris</i>     | 564374226 | <i>Rattus norvegicus</i>          |
| 545517283 | <i>Canis lupus familiaris</i>     | 568918427 | <i>Mus musculus</i>               |
| 545857927 | <i>Sus scrofa</i>                 | 573877187 | <i>Lepisosteus oculatus</i>       |
| 545857930 | <i>Sus scrofa</i>                 | 573883999 | <i>Lepisosteus oculatus</i>       |
| 545874461 | <i>Sus scrofa</i>                 | 573897889 | <i>Lepisosteus oculatus</i>       |
| 548341928 | <i>Pundamilia nyererei</i>        | 573901160 | <i>Lepisosteus oculatus</i>       |
| 548347500 | <i>Pundamilia nyererei</i>        | 583986710 | <i>Neolamprologus brichardi</i>   |
| 548347502 | <i>Pundamilia nyererei</i>        | 584006652 | <i>Neolamprologus brichardi</i>   |
| 548347926 | <i>Pundamilia nyererei</i>        | 584006654 | <i>Neolamprologus brichardi</i>   |
| 548453393 | <i>Capra hircus</i>               | 584043505 | <i>Myotis davidii</i>             |
| 548476237 | <i>Capra hircus</i>               | 584064706 | <i>Myotis davidii</i>             |
| 548509077 | <i>Capra hircus</i>               | 584077036 | <i>Myotis davidii</i>             |
| 548509079 | <i>Capra hircus</i>               | 585149822 | <i>Leptonychotes weddellii</i>    |
| 551490362 | <i>Xiphophorus maculatus</i>      | 585173429 | <i>Leptonychotes weddellii</i>    |
| 551507740 | <i>Xiphophorus maculatus</i>      | 585173431 | <i>Leptonychotes weddellii</i>    |
| 554529333 | <i>Myotis brandtii</i>            | 585191864 | <i>Leptonychotes weddellii</i>    |

|           |                                            |           |                                      |
|-----------|--------------------------------------------|-----------|--------------------------------------|
| 585638395 | <i>Elephantulus edwardii</i>               | 617420008 | <i>Poecilia formosa</i>              |
| 585642658 | <i>Elephantulus edwardii</i>               | 617605689 | <i>Erinaceus europaeus</i>           |
| 585681904 | <i>Saccoglossus kowalevskii</i>            | 617638697 | <i>Erinaceus europaeus</i>           |
| 585690235 | <i>Saccoglossus kowalevskii</i>            | 617654303 | <i>Erinaceus europaeus</i>           |
| 585717270 | <i>Elephantulus edwardii</i>               | 620978842 | <i>Ornithorhynchus anatinus</i>      |
| 586449065 | <i>Chrysochloris asiatica</i>              | 625206893 | <i>Cricetulus griseus</i>            |
| 586472956 | <i>Chrysochloris asiatica</i>              | 625213678 | <i>Cricetulus griseus</i>            |
| 586539674 | <i>Pteropus alecto</i>                     | 625234420 | <i>Cricetulus griseus</i>            |
| 586539676 | <i>Pteropus alecto</i>                     | 625234422 | <i>Cricetulus griseus</i>            |
| 586565816 | <i>Pteropus alecto</i>                     | 625246515 | <i>Cricetulus griseus</i>            |
| 586997260 | <i>Felis catus</i>                         | 625254256 | <i>Cricetulus griseus</i>            |
| 587008394 | <i>Felis catus</i>                         | 62751389  | <i>Bos taurus</i>                    |
| 587008396 | <i>Felis catus</i>                         | 632945385 | <i>Callorhinchus milii</i>           |
| 587011657 | <i>Felis catus</i>                         | 632976448 | <i>Callorhinchus milii</i>           |
| 588480439 | <i>Pteropus alecto</i>                     | 632981623 | <i>Callorhinchus milii</i>           |
| 588480490 | <i>Pteropus alecto</i>                     | 634850933 | <i>Orycteropus afer afer</i>         |
| 588480506 | <i>Pteropus alecto</i>                     | 634851763 | <i>Orycteropus afer afer</i>         |
| 589925029 | <i>Peromyscus maniculatus bairdii</i>      | 634875734 | <i>Orycteropus afer afer</i>         |
| 589943938 | <i>Peromyscus maniculatus bairdii</i>      | 635058327 | <i>Chlorocebus sabaeus</i>           |
| 589960757 | <i>Peromyscus maniculatus bairdii</i>      | 635058329 | <i>Chlorocebus sabaeus</i>           |
| 591299240 | <i>Panthera tigris altaica</i>             | 635073168 | <i>Chlorocebus sabaeus</i>           |
| 591299242 | <i>Panthera tigris altaica</i>             | 635092341 | <i>Chlorocebus sabaeus</i>           |
| 591303338 | <i>Panthera tigris altaica</i>             | 635092343 | <i>Chlorocebus sabaeus</i>           |
| 591303340 | <i>Panthera tigris altaica</i>             | 635092345 | <i>Chlorocebus sabaeus</i>           |
| 591323280 | <i>Panthera tigris altaica</i>             | 635092347 | <i>Chlorocebus sabaeus</i>           |
| 591359695 | <i>Chelonia mydas</i>                      | 635092349 | <i>Chlorocebus sabaeus</i>           |
| 591363601 | <i>Chelonia mydas</i>                      | 635092351 | <i>Chlorocebus sabaeus</i>           |
| 591381440 | <i>Chelonia mydas</i>                      | 637299422 | <i>Anolis carolinensis</i>           |
| 593717924 | <i>Physeter catodon</i>                    | 637299426 | <i>Anolis carolinensis</i>           |
| 593747658 | <i>Physeter catodon</i>                    | 637299430 | <i>Anolis carolinensis</i>           |
| 593755350 | <i>Physeter catodon</i>                    | 637299434 | <i>Anolis carolinensis</i>           |
| 594063588 | <i>Bubalus bubalis</i>                     | 637299444 | <i>Anolis carolinensis</i>           |
| 594073010 | <i>Bubalus bubalis</i>                     | 637299448 | <i>Anolis carolinensis</i>           |
| 594101952 | <i>Bubalus bubalis</i>                     | 637344897 | <i>Anolis carolinensis</i>           |
| 594657107 | <i>Balaenoptera acutorostrata scammoni</i> | 637352188 | <i>Anolis carolinensis</i>           |
| 594658856 | <i>Balaenoptera acutorostrata scammoni</i> | 640780400 | <i>Tarsius syrichta</i>              |
| 594658858 | <i>Balaenoptera acutorostrata scammoni</i> | 640792670 | <i>Tarsius syrichta</i>              |
| 594658860 | <i>Balaenoptera acutorostrata scammoni</i> | 640805855 | <i>Tarsius syrichta</i>              |
| 594659124 | <i>Balaenoptera acutorostrata scammoni</i> | 641696885 | <i>Eptesicus fuscus</i>              |
| 594659126 | <i>Balaenoptera acutorostrata scammoni</i> | 641703041 | <i>Eptesicus fuscus</i>              |
| 594659128 | <i>Balaenoptera acutorostrata scammoni</i> | 641703043 | <i>Eptesicus fuscus</i>              |
| 594670557 | <i>Balaenoptera acutorostrata scammoni</i> | 641716301 | <i>Eptesicus fuscus</i>              |
| 594670559 | <i>Balaenoptera acutorostrata scammoni</i> | 641763351 | <i>Chrysemys picta bellii</i>        |
| 594670561 | <i>Balaenoptera acutorostrata scammoni</i> | 641789818 | <i>Chrysemys picta bellii</i>        |
| 594670563 | <i>Balaenoptera acutorostrata scammoni</i> | 655600047 | <i>Oryctolagus cuniculus</i>         |
| 597736428 | <i>Astyanax mexicanus</i>                  | 655600049 | <i>Oryctolagus cuniculus</i>         |
| 597736430 | <i>Astyanax mexicanus</i>                  | 657557925 | <i>Stegastes partitus</i>            |
| 597751074 | <i>Astyanax mexicanus</i>                  | 657566562 | <i>Stegastes partitus</i>            |
| 597785802 | <i>Astyanax mexicanus</i>                  | 657799628 | <i>Cynoglossus semilaevis</i>        |
| 602629316 | <i>Python bivittatus</i>                   | 657800674 | <i>Cynoglossus semilaevis</i>        |
| 602655369 | <i>Python bivittatus</i>                   | 658839718 | <i>Poecilia reticulata</i>           |
| 602677894 | <i>Python bivittatus</i>                   | 658864888 | <i>Poecilia reticulata</i>           |
| 602677896 | <i>Python bivittatus</i>                   | 663239641 | <i>Calypte anna</i>                  |
| 602705673 | <i>Lipotes vexillifer</i>                  | 663247831 | <i>Calypte anna</i>                  |
| 602708581 | <i>Lipotes vexillifer</i>                  | 663268328 | <i>Calypte anna</i>                  |
| 602709522 | <i>Lipotes vexillifer</i>                  | 70608133  | <i>Mus musculus</i>                  |
| 611991734 | <i>Monodelphis domestica</i>               | 71982860  | <i>Caenorhabditis elegans</i>        |
| 611991736 | <i>Monodelphis domestica</i>               | 72010927  | <i>Strongylocentrotus purpuratus</i> |
| 612019329 | <i>Monodelphis domestica</i>               | 74004732  | <i>Canis lupus familiaris</i>        |
| 612019331 | <i>Monodelphis domestica</i>               | 76609700  | <i>Bos taurus</i>                    |
| 617381433 | <i>Poecilia formosa</i>                    |           |                                      |

**Table S1. Genbank protein IDs for all sequences used in this study.**

## 5'ppp

## Best Models

| Scoring function term           | ancRLR    |         | ancRIG-I  |         | ancMDA5-LGP2a |         | ancMDA5-LGP2b |         | ancMDA5   |         | ancLGP2   |         |
|---------------------------------|-----------|---------|-----------|---------|---------------|---------|---------------|---------|-----------|---------|-----------|---------|
|                                 | Raw score | Z-score | Raw score | Z-score | Raw score     | Z-score | Raw score     | Z-score | Raw score | Z-score | Raw score | Z-score |
| C_beta interaction energy       | -87.66    | -0.12   | -91.71    | -0.05   | -57.64        | -0.93   | -29.72        | -1.69   | -73.95    | -0.47   | -57.59    | -0.96   |
| All-atom pairwise energy        | -4577.51  | -0.93   | -4652.04  | -0.92   | -4404.85      | -1.01   | -2200.91      | -1.66   | -4343.1   | -1.01   | -4343.63  | -1.11   |
| Solvation energy                | -26.25    | -0.11   | -27.11    | -0.02   | -31.28        | 0.47    | -14.77        | 0.66    | -23.96    | -0.43   | -8.07     | -2.23   |
| Torsion angle energy            | -68.37    | 0.07    | -56.63    | -0.53   | -38.4         | -1.43   | -12.95        | -2.02   | -35.57    | -1.62   | -32.33    | -1.83   |
| Secondary structure agreement   | 67.90%    | -2.21   | 60.80%    | -3.27   | 65.10%        | -2.6    | 63.00%        | -2.6    | 68.30%    | -2.2    | 69.80%    | -2.07   |
| Solvent accessibility agreement | 79.20%    | 0.03    | 80.00%    | 0.19    | 84.00%        | 0.96    | 80.70%        | 0.9     | 78.50%    | -0.09   | 78.70%    | -0.08   |
| QMEAN6 score                    | 0.686     | -0.77   | 0.647     | -1.19   | 0.682         | -0.8    | 0.602         | -1.45   | 0.614     | -1.52   | 0.637     | -1.34   |
| dfire energy                    | -280.44   | N/A     | -278.59   | N/A     | -266.28       | N/A     | -132.88       | N/A     | -282.76   | N/A     | -284.48   | N/A     |

## 5'ppp

## Central Structures

| Scoring function term           | ancRLR    |         | ancRIG-I  |         | ancMDA5-LGP2a |         | ancMDA5-LGP2b |         | ancMDA5   |         | ancLGP2   |         |
|---------------------------------|-----------|---------|-----------|---------|---------------|---------|---------------|---------|-----------|---------|-----------|---------|
|                                 | Raw score | Z-score | Raw score | Z-score | Raw score     | Z-score | Raw score     | Z-score | Raw score | Z-score | Raw score | Z-score |
| C_beta interaction energy       | -51.56    | -0.84   | -63.55    | -0.48   | -25.59        | -1.78   | -53.19        | -0.81   | -48.92    | -0.98   | -29       | -1.6    |
| All-atom pairwise energy        | -4270.02  | -0.55   | -5153.45  | -0.09   | -3669.48      | -1.01   | -3748.56      | -0.93   | -3892.97  | -0.82   | -4270.88  | -0.65   |
| Solvation energy                | -23.11    | -0.2    | -28.59    | 0.42    | -21.8         | -0.41   | -20.06        | -0.6    | -2.39     | -2.56   | -3.8      | -2.62   |
| Torsion angle energy            | -37.81    | -0.45   | -43.38    | -0.02   | -23.5         | -1.84   | -47.85        | -0.48   | -34.58    | -1.11   | -26.88    | -1.74   |
| Secondary structure agreement   | 60.90%    | -3.13   | 59.50%    | -3.33   | 59.70%        | -3.35   | 56.10%        | -3.8    | 69.60%    | -1.89   | 63.10%    | -2.98   |
| Solvent accessibility agreement | 80.00%    | 0.18    | 79.10%    | 0.02    | 80.50%        | 0.31    | 81.10%        | 0.42    | 79.60%    | 0.15    | 81.60%    | 0.48    |
| QMEAN6 score                    | 0.66      | -1.01   | 0.656     | -1.06   | 0.604         | -1.59   | 0.657         | -1.03   | 0.692     | -0.67   | 0.672     | -0.92   |
| dfire energy                    | -297.73   | N/A     | -305.79   | N/A     | -284.06       | N/A     | -274.57       | N/A     | -291.09   | N/A     | -292.82   | N/A     |

**Blunt Best Models**

| Scoring function term           | ancRLR    |         | ancRIG-I  |         | ancMDA5-LGP2a |         | ancMDA5-LGP2b |         | ancMDA5   |         | ancLGP2   |         |
|---------------------------------|-----------|---------|-----------|---------|---------------|---------|---------------|---------|-----------|---------|-----------|---------|
|                                 | Raw score | Z-score | Raw score | Z-score | Raw score     | Z-score | Raw score     | Z-score | Raw score | Z-score | Raw score | Z-score |
| C_beta interaction energy       | -86.67    | -0.12   | -84.67    | -0.21   | -66.03        | -0.68   | -27.53        | -1.77   | -74.84    | -0.42   | -71.8     | -0.54   |
| All-atom pairwise energy        | -4849.47  | -0.77   | -5062.41  | -0.69   | -4548.76      | -0.93   | -2398.1       | -1.47   | -5102.42  | -0.57   | -4897.89  | -0.8    |
| Solvation energy                | -25.41    | -0.2    | -23.41    | -0.42   | -33.33        | 0.69    | -14.59        | 0.64    | -20.29    | -0.83   | -18.46    | -1.13   |
| Torsion angle energy            | -51.7     | -0.78   | -60.36    | -0.34   | -40.55        | -1.32   | -23.01        | -1.05   | -30.67    | -1.86   | -43.36    | -1.31   |
| Secondary structure agreement   | 68.80%    | -2.09   | 63.30%    | -2.89   | 66.80%        | -2.35   | 63.90%        | -2.49   | 67.90%    | -2.26   | 67.80%    | -2.37   |
| Solvent accessibility agreement | 79.60%    | 0.11    | 80.00%    | 0.19    | 79.00%        | 0.02    | 79.00%        | 0.58    | 80.10%    | 0.21    | 82.60%    | 0.64    |
| QMEAN6 score                    | 0.667     | -0.97   | 0.673     | -0.91   | 0.615         | -1.51   | 0.623         | -1.22   | 0.64      | -1.25   | 0.697     | -0.67   |
| dfire energy                    | -276.06   | N/A     | -276.37   | N/A     | -267.83       | N/A     | -135.94       | N/A     | -283.73   | N/A     | -287.44   | N/A     |

**Blunt Central Structures**

| Scoring function term           | ancRLR    |         | ancRIG-I  |         | ancMDA5-LGP2a |         | ancMDA5-LGP2b |         | ancMDA5   |         | ancLGP2   |         |
|---------------------------------|-----------|---------|-----------|---------|---------------|---------|---------------|---------|-----------|---------|-----------|---------|
|                                 | Raw score | Z-score | Raw score | Z-score | Raw score     | Z-score | Raw score     | Z-score | Raw score | Z-score | Raw score | Z-score |
| C_beta interaction energy       | -47.65    | -0.98   | -46.73    | -1      | -32.62        | -1.56   | -24.36        | -1.82   | -45.68    | -1.08   | -27.19    | -1.72   |
| All-atom pairwise energy        | -4628.6   | -0.33   | -4342.24  | -0.47   | -4148.26      | -0.76   | -3628.43      | -1.05   | -4346.2   | -0.54   | -4063.86  | -0.91   |
| Solvation energy                | -19.63    | -0.59   | -23.74    | -0.12   | -19.32        | -0.69   | -22.37        | -0.35   | -8.24     | -1.93   | -7.54     | -2.21   |
| Torsion angle energy            | -41.52    | -0.17   | -27.78    | -1.21   | -33.77        | -1.2    | -43.2         | -0.75   | -25.4     | -1.7    | -34.74    | -1.26   |
| Secondary structure agreement   | 64.50%    | -2.61   | 58.60%    | -3.46   | 59.70%        | -3.35   | 57.90%        | -3.55   | 71.30%    | -1.64   | 66.40%    | -2.49   |
| Solvent accessibility agreement | 82.30%    | 0.59    | 79.50%    | 0.1     | 81.40%        | 0.47    | 80.30%        | 0.26    | 80.00%    | 0.23    | 79.90%    | 0.18    |
| QMEAN6 score                    | 0.729     | -0.31   | 0.615     | -1.48   | 0.651         | -1.11   | 0.635         | -1.26   | 0.677     | -0.83   | 0.669     | -0.95   |
| dfire energy                    | -295.39   | N/A     | -295.55   | N/A     | -287.41       | N/A     | -284.59       | N/A     | -296.84   | N/A     | -307.8    | N/A     |

**Table S2. Molecular dynamics improves protein structural model quality.** We report structural model quality scores for ancestral RLR RDs bound to blunt-ended and 5'ppp dsRNA, both before and after model refinement by molecular dynamics (see Methods).

## Supplementary References

1. Kanehisa M: **The KEGG database**. *Novartis Found Symp* 2002, **247**:91-101; discussion 101-103, 119-128, 244-152.
2. Meylan E, Curran J, Hofmann K, Moradpour D, Binder M, Bartenschlager R, Tschopp J: **Cardif is an adaptor protein in the RIG-I antiviral pathway and is targeted by hepatitis C virus**. *Nature* 2005, **437**(7062):1167-1172.
3. Bruns AM, Horvath CM: **Antiviral RNA recognition and assembly by RLR family innate immune sensors**. *Cytokine Growth Factor Rev* 2014, **25**(5):507-512.
4. Bruns AM, Horvath CM: **LGP2 synergy with MDA5 in RLR-mediated RNA recognition and antiviral signaling**. *Cytokine* 2015, **74**(2):198-206.
5. Rodriguez KR, Bruns AM, Horvath CM: **MDA5 and LGP2: accomplices and antagonists of antiviral signal transduction**. *J Virol* 2014, **88**(15):8194-8200.
